# Supplementary material for: Asymmetric synthesis of C–F quaternary α-fluoro-β-amino-indolin-2-ones via Mannich addition reactions; facets of reactivity, structural generality and stereochemical outcome
Source: Royal Society of Chemistry journal article supplement (doi:10.1039/c6ra27710a), 2017-01-01
Supplement: c6ra27710a1.pdf [file c6ra27710a1.pdf]

*Supporting Information*

**Asymmetric synthesis of C-F quaternary  $\alpha$ -fluoro- $\beta$ -amino-indolin-2-ones via  
Mannich addition reactions; facets of reactivity, structural generality and  
stereochemical outcome**

Chen Xie, Wanxing Sha, Yi Zhu, Jianlin Han, Vadim A. Soloshonok and Yi Pan

|                                                         |            |
|---------------------------------------------------------|------------|
| <b>1. General information</b> .....                     | <b>S2</b>  |
| <b>2. General synthetic procedures</b> .....            | <b>S2</b>  |
| <b>3. Characterization data of compounds</b> .....      | <b>S3</b>  |
| <b>4. X-ray crystallography for 11bi</b> .....          | <b>S16</b> |
| <b>5. NMR spectra</b> .....                             | <b>S17</b> |
| <b>6. HPLC spectra of deprotection product 14</b> ..... | <b>S81</b> |

## 1. General information

All commercial reagents were used without additional purification unless otherwise specified.  $\beta$ -keto-amides-hydrates **8** and **12** were synthesized according to literature.<sup>1</sup> Solvents were purified and dried according to standard methods prior to use. All experiments were monitored by thin layer chromatography (TLC) using UV light as visualizing agent. TLC was performed on pre-coated silica gel plated. Column chromatography was performed using silica gel 60 (300-400 mesh).

<sup>1</sup>H NMR, <sup>13</sup>C NMR and <sup>19</sup>F NMR were measured on Bruker AVANCE III-400. Chemical shifts are reported in ppm ( $\delta$ ) relative to internal tetramethylsilane (TMS,  $\delta$  0.0 ppm) or with the solvent reference relative to TMS employed as the internal standard. Data are reported as follows: chemical shift (multiplicity [singlet (s), doublet (d), triplet (t), quartet (q), broad (br) and multiplet (m)], coupling constants [Hz], integration). <sup>19</sup>F NMR spectra were broadband decoupled from hydrogen nuclei. Melting points are uncorrected. Values of optical rotation were measured on Rudolph Automatic Polarimeter A21101 at the wavelength of the sodium D-line (589 nm). Infrared spectra were obtained on Bruker Vector 22 in KBr pellets. HRMS were recorded on a LTQ-Orbitrap XL (ThermoFisher, U. S. A.). HPLC analysis were performed on Shimadzu SPD-20A using Daicel Chiralpak AD-H Column.

References:

1. Xie, C.; Zhang, L.; Sha, W.; Soloshonok, V. A.; Han, J.; Pan, Y. *Org. Lett.* **2016**, *18*, 3270-3273.

## 2. General synthetic procedures

### 2.1. General procedures for asymmetric detrifluoroacetylative Mannich reaction

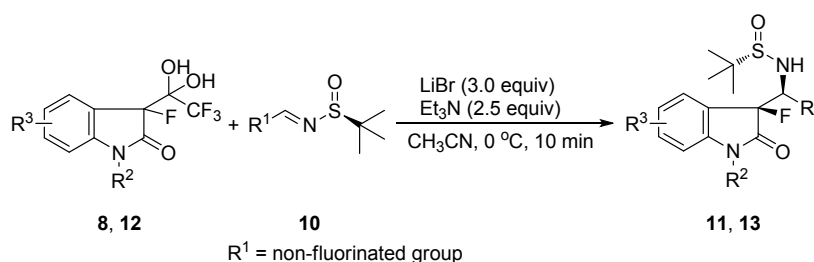

To a solution of  $\beta$ -keto-amides-hydrates **8** or **12** (0.6 mmol), non-fluorinated sulfinylimines **10** (0.5 mmol), and LiBr (156.3 mg, 1.8 mmol) in CH<sub>3</sub>CN (5 mL) at 0 °C was added Et<sub>3</sub>N (151.8 mg, 1.5 mmol) dropwise. After 10 min, the reaction was quenched with saturated aqueous NH<sub>4</sub>Cl (5 mL) followed by H<sub>2</sub>O (10 mL) and EtOAc (20 mL), then the mixture was brought to room temperature. The organic layer was taken and the aqueous layer was extracted with EtOAc (2  $\times$  10 mL). The combined organic layer was washed with H<sub>2</sub>O (2  $\times$  20 mL) and brine solution (1  $\times$  20 mL) and dried with anhydrous Na<sub>2</sub>SO<sub>4</sub>, filtered and the solvent was removed to give the crude product, which was purified by column chromatography (petroleum ether/ethyl acetate = 2:1 to 1:2) to afford the corresponding product **11** or **13**.

## 2.2. Procedures for the deprotection to affording the free amine

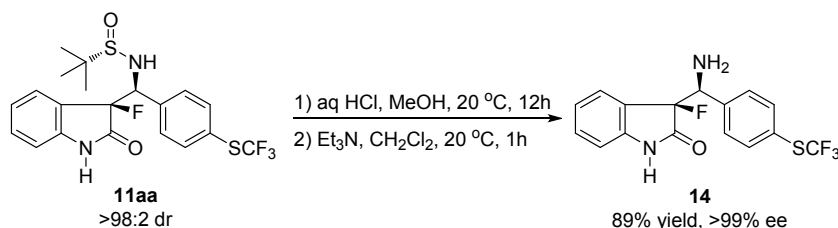

**11aa** (92.1 mg, 0.2 mmol) and MeOH (5 mL) were placed in a 25 mL round-bottom flask and aq HCl (36%, 1 mL) was added dropwise. The reaction was stirred at 20 °C for 12 h, during which the cleavage was monitored by TLC. Volatiles were removed under reduced pressure. The residue was dissolved in CH<sub>2</sub>Cl<sub>2</sub> (10 mL) and Et<sub>3</sub>N (1.52 g, 15 mmol) was added. The mixture was stirred at 20 °C for 1 h, then H<sub>2</sub>O (10 mL) was added. The organic layer was taken, washed with H<sub>2</sub>O (2 × 10 mL), dried with anhydrous Na<sub>2</sub>SO<sub>4</sub>, filtered and the solvent was removed to give the crude product, which was purified by column chromatography (petroleum ether/ethyl acetate = 1:1) to afford the corresponding deprotection product **14**.

## 3. Characterization data of compounds

### 3.1. Characterization data of compounds 11 and 13

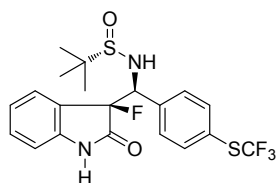

#### (S)-N-((S)-((S)-3-fluoro-2-oxoindolin-3-yl)(4-((trifluoromethyl)thio)phenyl)methyl)-2-methylpropane-2-sulfonamide (**11aa**)

White solid, 205.1 mg (89% yield),  $R_f = 0.26$  (hexanes/ethyl acetate = 1:1), m.p. 192–193 °C,  $[\alpha]_{20}^D = +55.3$  ( $c = 0.43$ , CH<sub>2</sub>Cl<sub>2</sub>). <sup>1</sup>H NMR (400 MHz, CDCl<sub>3</sub>)  $\delta$  8.97 (s, 1H), 7.42 (d,  $J = 8.2$  Hz, 2H), 7.30 (d,  $J = 7.5$  Hz, 1H), 7.24 – 7.16 (m, 3H), 7.01 (t,  $J = 7.6$  Hz, 1H), 6.63 (d,  $J = 7.8$  Hz, 1H), 5.27 (dd,  $J = 7.6, 4.9$  Hz, 1H), 4.97 (d,  $J = 4.6$  Hz, 1H), 1.22 (s, 9H); <sup>19</sup>F NMR (376 MHz, CDCl<sub>3</sub>)  $\delta$  -42.51 (s, 3F), -159.04 (s, 1F); <sup>13</sup>C NMR (101 MHz, CDCl<sub>3</sub>)  $\delta$  172.7 (d,  $J = 21.6$  Hz), 142.1 (d,  $J = 5.6$  Hz), 137.9 (d,  $J = 4.6$  Hz), 135.7, 132.1 (d,  $J = 2.8$  Hz), 129.9, 129.5 (q,  $J = 308.2$  Hz), 125.7, 124.8 (q,  $J = 1.9$  Hz), 123.1 (d,  $J = 18.6$  Hz), 123.1 (d,  $J = 2.4$  Hz), 111.0, 92.6 (d,  $J = 199.9$  Hz), 62.4 (d,  $J = 27.7$  Hz), 56.7, 22.6. IR (cm<sup>-1</sup>): 1732, 1720, 1625, 1477, 1157, 1117, 1085, 1046, 1015, 840, 756. HRMS (TOF MS ESI): calcd for C<sub>20</sub>H<sub>20</sub>F<sub>4</sub>N<sub>2</sub>O<sub>2</sub>S<sub>2</sub>Na<sup>+</sup> [M+Na]<sup>+</sup> 483.0795, found 483.0803.

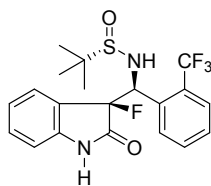

**(S)-N-((S)-((S)-3-fluoro-2-oxoindolin-3-yl)(2-(trifluoromethyl)phenyl)methyl)-2-methylpropane-2-sulfinamide (11ab)**

White solid, 137.6 mg (64% yield),  $R_f = 0.16$  (hexanes/ethyl acetate = 1:1), m.p. 192–193 °C,  $[\alpha]_{20}^D = +58.1$  ( $c = 0.15$ ,  $\text{CH}_2\text{Cl}_2$ ).  $^1\text{H NMR}$  (400 MHz, MeOD)  $\delta$  7.74 (d,  $J = 8.2$  Hz, 1H), 7.63 – 7.56 (m, 2H), 7.47 – 7.39 (m, 2H), 7.26 (tt,  $J = 7.8, 1.4$  Hz, 1H), 6.99 (t,  $J = 7.6$  Hz, 1H), 6.80 (d,  $J = 7.8$  Hz, 1H), 5.47 (d,  $J = 14.5$  Hz, 1H), 4.87 (s, 2H), 1.07 (s, 9H);  $^{19}\text{F NMR}$  (376 MHz, MeOD)  $\delta$  -57.01 (d,  $J = 3.9$  Hz, 3F), -159.93 (s, 1F);  $^{13}\text{C NMR}$  (101 MHz, MeOD)  $\delta$  175.1 (d,  $J = 20.9$  Hz), 143.9 (d,  $J = 5.8$  Hz), 136.9 (dd,  $J = 3.6, 1.2$  Hz), 133.3, 133.0 (d,  $J = 2.8$  Hz), 130.8 (d,  $J = 1.1$  Hz), 129.9, 129.2 (q,  $J = 29.7$  Hz), 127.8, 127.1 (q,  $J = 5.9$  Hz), 125.5 (q,  $J = 273.9$  Hz), 124.7 (d,  $J = 18.4$  Hz), 123.6 (d,  $J = 2.5$  Hz), 111.7, 93.8 (d,  $J = 195.8$  Hz), 60.6 (dd,  $J = 29.5, 2.2$  Hz), 57.9, 22.6. IR ( $\text{cm}^{-1}$ ): 1716, 1616, 1473, 1311, 1164, 1121, 1032, 1012, 758. HRMS (TOF MS ESI): calcd for  $\text{C}_{20}\text{H}_{20}\text{F}_4\text{N}_2\text{O}_2\text{SNa}^+ [\text{M}+\text{Na}]^+$  451.1074, found 451.1075.

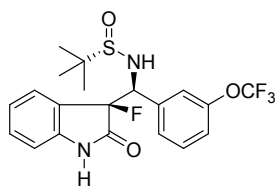

**(S)-N-((S)-((S)-3-fluoro-2-oxoindolin-3-yl)(3-(trifluoromethoxy)phenyl)methyl)-2-methylpropane-2-sulfinamide (11ac)**

White solid, 188.9 mg (85% yield),  $R_f = 0.28$  (hexanes/ethyl acetate = 1:1), m.p. 156–157 °C,  $[\alpha]_{20}^D = +47.2$  ( $c = 0.22$ ,  $\text{CH}_2\text{Cl}_2$ ).  $^1\text{H NMR}$  (400 MHz,  $\text{CDCl}_3$ )  $\delta$  8.68 (s, 1H), 7.29 (d,  $J = 7.5$  Hz, 1H), 7.25 – 7.15 (m, 2H), 7.12 – 6.99 (m, 4H), 6.65 (d,  $J = 7.8$  Hz, 1H), 5.25 (dd,  $J = 7.4, 4.7$  Hz, 1H), 4.87 (d,  $J = 3.6$  Hz, 1H), 1.22 (s, 9H);  $^{19}\text{F NMR}$  (376 MHz,  $\text{CDCl}_3$ )  $\delta$  -57.93 (s, 3F), -159.12 (s, 1F);  $^{13}\text{C NMR}$  (101 MHz,  $\text{CDCl}_3$ )  $\delta$  172.6 (d,  $J = 21.6$  Hz), 148.9 (q,  $J = 1.7$  Hz), 141.9 (d,  $J = 5.6$  Hz), 137.2 (d,  $J = 4.7$  Hz), 132.1 (d,  $J = 2.8$  Hz), 129.5, 127.7, 125.7, 123.2, 123.1 (d,  $J = 20.4$  Hz), 121.5, 121.3, 120.4 (q,  $J = 257.5$  Hz), 110.9, 92.6 (d,  $J = 199.7$  Hz), 62.3 (d,  $J = 27.7$  Hz), 56.7, 22.6. IR ( $\text{cm}^{-1}$ ): 1718, 1474, 1254, 1203, 1151, 1061, 1032, 755. HRMS (TOF MS ESI): calcd for  $\text{C}_{20}\text{H}_{20}\text{F}_4\text{N}_2\text{O}_3\text{SNa}^+ [\text{M}+\text{Na}]^+$  467.1023, found 467.1020.

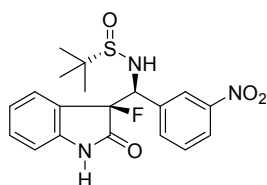

**(S)-N-((S)-((S)-3-fluoro-2-oxoindolin-3-yl)(3-nitrophenyl)methyl)-2-methylpropane-2-sulfinamide (11ad)**

White solid, 194.3 mg (96% yield),  $R_f = 0.22$  (hexanes/ethyl acetate = 1:1), m.p. 208–209 °C,  $[\alpha]_{20}^D = +72.2$  ( $c = 0.42$ ,  $\text{CH}_2\text{Cl}_2$ ).  $^1\text{H NMR}$  (400 MHz,  $\text{CDCl}_3$ )  $\delta$  9.29 (s, 1H), 8.10 – 8.00 (m,

2H), 7.48 (d,  $J = 7.5$  Hz, 1H), 7.33 (dd,  $J = 15.7, 7.7$  Hz, 2H), 7.20 (t,  $J = 7.6$  Hz, 1H), 7.03 (t,  $J = 7.5$  Hz, 1H), 6.65 (d,  $J = 7.7$  Hz, 1H), 5.38 – 5.32 (m, 1H), 5.06 (d,  $J = 4.3$  Hz, 1H), 1.22 (s, 9H);  $^{19}\text{F}$  NMR (376 MHz,  $\text{CDCl}_3$ )  $\delta$  -159.21 (s, 1F);  $^{13}\text{C}$  NMR (101 MHz,  $\text{CDCl}_3$ )  $\delta$  172.5 (d,  $J = 21.4$  Hz), 147.9, 142.0 (d,  $J = 5.6$  Hz), 137.3 (d,  $J = 4.6$  Hz), 135.1, 132.4 (d,  $J = 2.7$  Hz), 129.2, 125.6, 123.7, 123.6, 123.3 (d,  $J = 2.3$  Hz), 122.7 (d,  $J = 18.6$  Hz), 111.2, 92.4 (d,  $J = 200.3$  Hz), 62.1 (d,  $J = 28.1$  Hz), 56.9, 22.6. IR ( $\text{cm}^{-1}$ ): 1733, 1626, 1528, 1478, 1348, 1198, 1037, 813. HRMS (TOF MS ESI): calcd for  $\text{C}_{19}\text{H}_{20}\text{FN}_3\text{O}_4\text{SNa}^+$   $[\text{M}+\text{Na}]^+$  428.1051, found 428.1059.

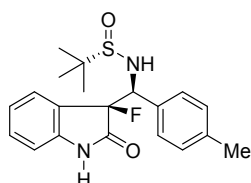

**(S)-N-((S)-((S)-3-fluoro-2-oxoindolin-3-yl)(p-tolyl)methyl)-2-methylpropane-2-sulfonamide (11ae)**

White solid, 148.0 mg (79% yield),  $R_f = 0.24$  (hexanes/ethyl acetate = 1:1), m.p. 186–187 °C,  $[\alpha]_{20}^D = +46.3$  ( $c = 0.38$ ,  $\text{CH}_2\text{Cl}_2$ ).  $^1\text{H}$  NMR (400 MHz,  $\text{CDCl}_3$ )  $\delta$  9.05 (s, 1H), 7.28 (d,  $J = 7.5$  Hz, 1H), 7.15 (t,  $J = 7.7$  Hz, 1H), 7.03 (d,  $J = 8.1$  Hz, 2H), 7.01 – 6.90 (m, 3H), 6.63 (d,  $J = 7.8$  Hz, 1H), 5.19 (dd,  $J = 7.6, 4.9$  Hz, 1H), 4.95 (s, 1H), 2.21 (s, 3H), 1.21 (s, 9H);  $^{19}\text{F}$  NMR (376 MHz,  $\text{CDCl}_3$ )  $\delta$  -158.06 (s, 1F);  $^{13}\text{C}$  NMR (101 MHz,  $\text{CDCl}_3$ )  $\delta$  173.2 (d,  $J = 21.6$  Hz), 142.3 (d,  $J = 5.5$  Hz), 138.1, 131.7 (d,  $J = 2.8$  Hz), 131.5 (d,  $J = 4.6$  Hz), 128.8, 128.8, 125.7, 123.7 (d,  $J = 18.4$  Hz), 122.7, 110.9, 92.9 (d,  $J = 197.9$  Hz), 62.5 (d,  $J = 27.1$  Hz), 56.5, 22.7, 21.2. IR ( $\text{cm}^{-1}$ ): 1714, 1623, 1473, 1198, 1059, 1032, 826, 755. HRMS (TOF MS ESI): calcd for  $\text{C}_{20}\text{H}_{23}\text{FN}_2\text{O}_2\text{SNa}^+$   $[\text{M}+\text{Na}]^+$  397.1356, found 397.1360.

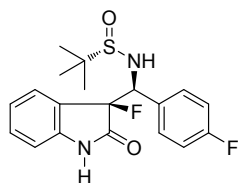

**(S)-N-((S)-((S)-3-fluoro-2-oxoindolin-3-yl)(4-fluorophenyl)methyl)-2-methylpropane-2-sulfonamide (11af)**

White solid, 160.4 mg (85% yield),  $R_f = 0.24$  (hexanes/ethyl acetate = 1:1), m.p. 183–184 °C,  $[\alpha]_{20}^D = +60.5$  ( $c = 0.17$ ,  $\text{CH}_2\text{Cl}_2$ ).  $^1\text{H}$  NMR (400 MHz,  $\text{CDCl}_3$ )  $\delta$  9.02 (s, 1H), 7.34 (d,  $J = 7.4$  Hz, 1H), 7.18 (t,  $J = 7.7$  Hz, 1H), 7.12 (dd,  $J = 8.3, 5.4$  Hz, 2H), 7.01 (t,  $J = 7.6$  Hz, 1H), 6.82 (t,  $J = 8.5$  Hz, 2H), 6.64 (d,  $J = 7.8$  Hz, 1H), 5.23 (dd,  $J = 7.4, 4.4$  Hz, 1H), 4.98 (d,  $J = 3.9$  Hz, 1H), 1.22 (s, 9H);  $^{19}\text{F}$  NMR (376 MHz,  $\text{CDCl}_3$ )  $\delta$  -113.14 (s, 1F), -158.96 (s, 1F);  $^{13}\text{C}$  NMR (101 MHz,  $\text{CDCl}_3$ )  $\delta$  172.9 (d,  $J = 21.7$  Hz), 162.6 (d,  $J = 247.7$  Hz), 142.1 (d,  $J = 5.6$  Hz), 131.9 (d,  $J = 2.7$  Hz), 130.7 (d,  $J = 8.2$  Hz), 130.3 (dd,  $J = 5.0, 3.2$  Hz), 125.6, 123.5 (d,  $J = 18.5$  Hz), 123.0 (d,  $J = 2.4$  Hz), 115.1 (d,  $J = 21.6$  Hz), 110.9, 92.8 (d,  $J = 198.8$  Hz), 62.1 (d,  $J = 27.2$  Hz), 56.6, 22.7. IR ( $\text{cm}^{-1}$ ): 1724, 1623, 1509, 1474, 1227, 1204, 1190, 1048, 840, 756, 708. HRMS (TOF MS ESI): calcd for  $\text{C}_{19}\text{H}_{20}\text{F}_2\text{N}_2\text{O}_2\text{SNa}^+$   $[\text{M}+\text{Na}]^+$  401.1106, found 401.1106.

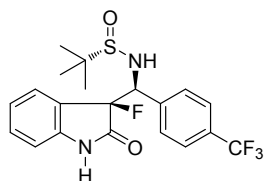

**(S)-N-((S)-((S)-3-fluoro-2-oxoindolin-3-yl)(4-(trifluoromethyl)phenyl)methyl)-2-methylpropane-2-sulfinamide (11ag)**

White solid, 194.7 mg (91% yield),  $R_f = 0.26$  (hexanes/ethyl acetate = 1:1), m.p. 197–198 °C,  $[\alpha]_{20}^D = +59.9$  ( $c = 0.45$ ,  $\text{CH}_2\text{Cl}_2$ ).  $^1\text{H NMR}$  (400 MHz,  $\text{CDCl}_3$ )  $\delta$  8.35 (s, 1H), 7.42 (d,  $J = 8.2$  Hz, 2H), 7.35 (d,  $J = 7.5$  Hz, 1H), 7.28 (d,  $J = 8.2$  Hz, 2H), 7.23 (d,  $J = 7.7$  Hz, 1H), 7.06 (t,  $J = 7.6$  Hz, 1H), 6.65 (d,  $J = 7.8$  Hz, 1H), 5.29 (dd,  $J = 7.2, 4.7$  Hz, 1H), 4.88 (d,  $J = 4.2$  Hz, 1H), 1.23 (s, 9H);  $^{19}\text{F NMR}$  (376 MHz,  $\text{CDCl}_3$ )  $\delta$  -62.68 (s, 3F), -158.81 (s, 1F);  $^{13}\text{C NMR}$  (101 MHz,  $\text{CDCl}_3$ )  $\delta$  172.5 (d,  $J = 21.6$  Hz), 141.9 (d,  $J = 5.6$  Hz), 138.8 (d,  $J = 3.6$  Hz), 132.2 (d,  $J = 2.8$  Hz), 130.6 (q,  $J = 32.6$  Hz), 129.4, 125.7, 125.1 (q,  $J = 3.6$  Hz), 123.9 (q,  $J = 272.3$  Hz), 123.2 (d,  $J = 2.5$  Hz), 123.1 (d,  $J = 18.6$  Hz), 111.0, 92.5 (d,  $J = 199.5$  Hz), 62.4 (d,  $J = 27.5$  Hz), 56.7, 22.7. IR ( $\text{cm}^{-1}$ ): 1716, 1622, 1475, 1324, 1164, 1126, 1062, 1028, 1017, 849, 757. HRMS (TOF MS ESI): calcd for  $\text{C}_{20}\text{H}_{20}\text{F}_4\text{N}_2\text{O}_2\text{SNa}^+$   $[\text{M}+\text{Na}]^+$  451.1074, found 451.1072.

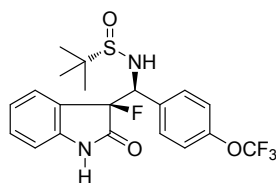

**(S)-N-((S)-((S)-3-fluoro-2-oxoindolin-3-yl)(4-(trifluoromethoxy)phenyl)methyl)-2-methylpropane-2-sulfinamide (11ah)**

White solid, 189.2 mg (85% yield),  $R_f = 0.26$  (hexanes/ethyl acetate = 1:1), m.p. 162–163 °C,  $[\alpha]_{20}^D = +59.2$  ( $c = 0.45$ ,  $\text{CH}_2\text{Cl}_2$ ).  $^1\text{H NMR}$  (400 MHz,  $\text{CDCl}_3$ )  $\delta$  9.43 (s, 1H), 7.32 (d,  $J = 7.4$  Hz, 1H), 7.22 – 7.13 (m, 3H), 7.02 – 6.94 (m, 3H), 6.64 (d,  $J = 7.8$  Hz, 1H), 5.26 (dd,  $J = 7.4, 4.8$  Hz, 1H), 5.06 (d,  $J = 4.4$  Hz, 1H), 1.21 (s, 9H);  $^{19}\text{F NMR}$  (376 MHz,  $\text{CDCl}_3$ )  $\delta$  -57.80 (s, 3F), -158.80 (s, 1F);  $^{13}\text{C NMR}$  (101 MHz,  $\text{CDCl}_3$ )  $\delta$  173.0 (d,  $J = 21.5$  Hz), 149.1 (d,  $J = 1.6$  Hz), 142.3 (d,  $J = 5.6$  Hz), 133.3 (d,  $J = 4.9$  Hz), 132.0 (d,  $J = 2.6$  Hz), 130.4, 125.5, 123.2 (d,  $J = 18.5$  Hz), 122.9 (d,  $J = 2.2$  Hz), 120.4 (q,  $J = 257.6$  Hz), 120.2, 111.0, 92.7 (d,  $J = 198.9$  Hz), 62.1 (d,  $J = 27.6$  Hz), 56.6, 22.6. IR ( $\text{cm}^{-1}$ ): 1721, 1624, 1508, 1475, 1254, 1222, 1205, 1162, 1055, 1044, 1018, 850, 755. HRMS (TOF MS ESI): calcd for  $\text{C}_{20}\text{H}_{20}\text{F}_4\text{N}_2\text{O}_3\text{SNa}^+$   $[\text{M}+\text{Na}]^+$  467.1023, found 467.1021.

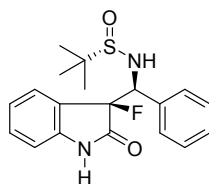

**(S)-N-((S)-((S)-3-fluoro-2-oxoindolin-3-yl)(phenyl)methyl)-2-methylpropane-2-sulfinamide (11ai)**

White solid, 149.3 mg (83% yield),  $R_f = 0.22$  (hexanes/ethyl acetate = 1:1), m.p. 207–208 °C,

$[\alpha]_{20}^D = +64.8$  ( $c = 0.40$ ,  $\text{CH}_2\text{Cl}_2$ ).  $^1\text{H NMR}$  (400 MHz,  $\text{CDCl}_3$ )  $\delta$  8.69 (s, 1H), 7.29 (d,  $J = 7.4$  Hz, 1H), 7.21 – 7.11 (m, 6H), 7.00 (t,  $J = 7.6$  Hz, 1H), 6.62 (d,  $J = 7.8$  Hz, 1H), 5.22 (dd,  $J = 7.6$ , 4.9 Hz, 1H), 4.91 (d,  $J = 4.3$  Hz, 1H), 1.22 (s, 9H);  $^{19}\text{F NMR}$  (376 MHz,  $\text{CDCl}_3$ )  $\delta$  -158.10 (s, 1F);  $^{13}\text{C NMR}$  (101 MHz,  $\text{CDCl}_3$ )  $\delta$  173.0 (d,  $J = 21.7$  Hz), 142.1 (d,  $J = 5.6$  Hz), 134.6 (d,  $J = 4.6$  Hz), 131.8 (d,  $J = 2.8$  Hz), 129.0, 128.5, 128.1, 125.8, 123.6 (d,  $J = 18.5$  Hz), 122.9 (d,  $J = 2.5$  Hz), 110.8, 92.9 (d,  $J = 198.6$  Hz), 62.8 (d,  $J = 27.1$  Hz), 56.6, 22.7. IR ( $\text{cm}^{-1}$ ): 1718, 1626, 1477, 1195, 1037, 745, 703. HRMS (TOF MS ESI): calcd for  $\text{C}_{19}\text{H}_{21}\text{FN}_2\text{O}_2\text{SNa}^+$   $[\text{M}+\text{Na}]^+$  383.1200, found 383.1207.

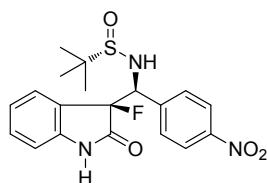

**(S)-N-((S)-((S)-3-fluoro-2-oxoindolin-3-yl)(4-nitrophenyl)methyl)-2-methylpropane-2-sulfonamide (11aj)**

White solid, 196.3 mg (97% yield),  $R_f = 0.21$  (hexanes/ethyl acetate = 1:1), m.p. 217–218 °C,  $[\alpha]_{20}^D = +58.7$  ( $c = 0.47$ ,  $\text{CH}_2\text{Cl}_2$ ).  $^1\text{H NMR}$  (400 MHz,  $\text{CDCl}_3$ )  $\delta$  9.14 (s, 1H), 7.98 (d,  $J = 8.7$  Hz, 2H), 7.38 (d,  $J = 7.5$  Hz, 1H), 7.34 (d,  $J = 8.7$  Hz, 2H), 7.21 (t,  $J = 7.8$  Hz, 1H), 7.04 (t,  $J = 7.6$  Hz, 1H), 6.66 (d,  $J = 7.8$  Hz, 1H), 5.36 (dd,  $J = 7.6$ , 4.8 Hz, 1H), 5.12 (d,  $J = 4.5$  Hz, 1H), 1.22 (s, 9H);  $^{19}\text{F NMR}$  (376 MHz,  $\text{CDCl}_3$ )  $\delta$  -158.65 (s, 1F);  $^{13}\text{C NMR}$  (101 MHz,  $\text{CDCl}_3$ )  $\delta$  172.6 (d,  $J = 21.4$  Hz), 147.7, 142.2 (d,  $J = 5.2$  Hz), 132.3 (d,  $J = 2.1$  Hz), 129.8, 125.5, 123.2, 123.1, 123.1, 122.8 (d,  $J = 18.3$  Hz), 111.3, 92.2 (d,  $J = 199.7$  Hz), 62.5 (d,  $J = 28.1$  Hz), 56.8, 22.5. IR ( $\text{cm}^{-1}$ ): 1716, 1623, 1525, 1473, 1346, 1196, 1059, 1025, 1012, 833, 758. HRMS (TOF MS ESI): calcd for  $\text{C}_{19}\text{H}_{20}\text{FN}_3\text{O}_4\text{SNa}^+$   $[\text{M}+\text{Na}]^+$  428.1051, found 428.1051.

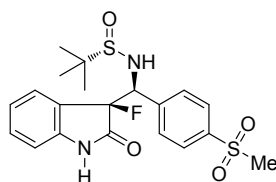

**(S)-N-((S)-((S)-3-fluoro-2-oxoindolin-3-yl)(4-(methylsulfonyl)phenyl)methyl)-2-methylpropane-2-sulfonamide (11ak)**

White solid, 199.7 mg (91% yield),  $R_f = 0.19$  (hexanes/ethyl acetate = 1:2), m.p. 200–201 °C,  $[\alpha]_{20}^D = +53.8$  ( $c = 0.51$ ,  $\text{CH}_2\text{Cl}_2$ ).  $^1\text{H NMR}$  (400 MHz,  $\text{CDCl}_3$ )  $\delta$  9.11 (s, 1H), 7.71 (d,  $J = 8.4$  Hz, 2H), 7.41 – 7.33 (m, 3H), 7.20 (t,  $J = 7.7$  Hz, 1H), 7.03 (t,  $J = 7.6$  Hz, 1H), 6.65 (d,  $J = 7.8$  Hz, 1H), 5.33 (dd,  $J = 7.5$ , 4.8 Hz, 1H), 5.09 (s, 1H), 2.99 (s, 3H), 1.22 (s, 9H);  $^{19}\text{F NMR}$  (376 MHz,  $\text{CDCl}_3$ )  $\delta$  -158.31 (s, 1F);  $^{13}\text{C NMR}$  (101 MHz,  $\text{CDCl}_3$ )  $\delta$  172.5 (d,  $J = 21.6$  Hz), 142.1 (d,  $J = 5.4$  Hz), 141.2 (d,  $J = 4.8$  Hz), 140.4, 132.3 (d,  $J = 2.6$  Hz), 130.0, 127.1, 125.5, 123.2, 122.9 (d,  $J = 18.5$  Hz), 111.3, 92.3 (d,  $J = 199.6$  Hz), 62.4 (d,  $J = 27.8$  Hz), 56.8, 44.4, 22.7. IR ( $\text{cm}^{-1}$ ): 1737, 1718, 1624, 1477, 1310, 1146, 1046, 1036, 956, 758. HRMS (TOF MS ESI): calcd for  $\text{C}_{20}\text{H}_{23}\text{FN}_2\text{O}_4\text{S}_2\text{Na}^+$   $[\text{M}+\text{Na}]^+$  461.0975, found 461.0975.

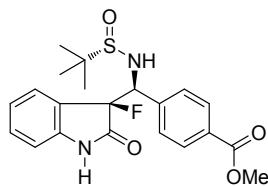

**methyl 4-((S)-((S)-1,1-dimethylethylsulfonamido)((S)-3-fluoro-2-oxoindolin-3-yl)methyl)benzoate (11al)**

White solid, 188.2 mg (90% yield),  $R_f = 0.21$  (hexanes/ethyl acetate = 1:1), m.p. 204–205 °C,  $[\alpha]_{20}^D = +53.8$  ( $c = 0.73$ ,  $\text{CH}_2\text{Cl}_2$ ).  $^1\text{H NMR}$  (400 MHz,  $\text{CDCl}_3$ )  $\delta$  8.83 (s, 1H), 7.81 (d,  $J = 8.3$  Hz, 2H), 7.31 (d,  $J = 7.4$  Hz, 1H), 7.23 (d,  $J = 8.3$  Hz, 2H), 7.18 (t,  $J = 7.8$  Hz, 1H), 7.01 (t,  $J = 7.6$  Hz, 1H), 6.62 (d,  $J = 7.8$  Hz, 1H), 5.28 (dd,  $J = 7.6, 4.9$  Hz, 1H), 4.99 (d,  $J = 4.4$  Hz, 1H), 3.85 (s, 3H), 1.21 (s, 9H);  $^{19}\text{F NMR}$  (376 MHz,  $\text{CDCl}_3$ )  $\delta$  -158.45 (s, 1F);  $^{13}\text{C NMR}$  (101 MHz,  $\text{CDCl}_3$ )  $\delta$  172.7 (d,  $J = 21.6$  Hz), 166.8, 142.1 (d,  $J = 5.6$  Hz), 139.9 (d,  $J = 4.7$  Hz), 132.1 (d,  $J = 2.7$  Hz), 130.2, 129.3, 129.0, 125.7, 123.2 (d,  $J = 18.6$  Hz), 123.0 (d,  $J = 2.2$  Hz), 111.0, 92.5 (d,  $J = 199.4$  Hz), 62.7 (d,  $J = 27.6$  Hz), 56.7, 52.3, 22.6. IR ( $\text{cm}^{-1}$ ): 3256, 1723, 1623, 1471, 1264, 1111, 1080, 1058, 747, 723, 705. HRMS (TOF MS ESI): calcd for  $\text{C}_{21}\text{H}_{23}\text{FN}_2\text{O}_4\text{SNa}^+$   $[\text{M}+\text{Na}]^+$  441.1255, found 441.1254.

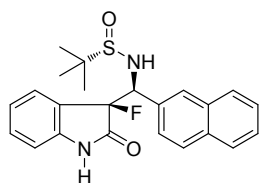

**(S)-N-(((S)-3-fluoro-2-oxoindolin-3-yl)(naphthalen-2-yl)methyl)-2-methylpropane-2-sulfonamide (11am)**

White solid, 174.3 mg (85% yield),  $R_f = 0.25$  (hexanes/ethyl acetate = 1:1), m.p. 201–202 °C,  $[\alpha]_{20}^D = +66.3$  ( $c = 0.66$ ,  $\text{CH}_2\text{Cl}_2$ ).  $^1\text{H NMR}$  (400 MHz,  $\text{CDCl}_3$ )  $\delta$  7.93 (s, 1H), 7.77–7.60 (m, 4H), 7.47–7.39 (m, 3H), 7.28–7.23 (m, 1H), 7.16 (tt,  $J = 7.8, 1.4$  Hz, 1H), 7.04 (t,  $J = 7.6$  Hz, 1H), 6.53 (d,  $J = 7.8$  Hz, 1H), 5.40 (dd,  $J = 7.4, 4.3$  Hz, 1H), 4.91 (d,  $J = 3.0$  Hz, 1H), 1.23 (s, 9H);  $^{19}\text{F NMR}$  (376 MHz,  $\text{CDCl}_3$ )  $\delta$  -158.21 (s, 1F);  $^{13}\text{C NMR}$  (101 MHz,  $\text{CDCl}_3$ )  $\delta$  172.9 (d,  $J = 21.7$  Hz), 141.9 (d,  $J = 5.8$  Hz), 133.2, 132.9, 132.1 (d,  $J = 4.7$  Hz), 131.9 (d,  $J = 2.8$  Hz), 128.9, 128.2, 127.8, 127.7, 126.6, 126.3, 126.2, 125.8, 123.7 (d,  $J = 18.5$  Hz), 123.0 (d,  $J = 2.1$  Hz), 110.8, 92.9 (d,  $J = 198.8$  Hz), 63.0 (d,  $J = 27.0$  Hz), 56.6, 22.7. IR ( $\text{cm}^{-1}$ ): 1718, 1475, 1205, 1037, 759, 751. HRMS (TOF MS ESI): calcd for  $\text{C}_{23}\text{H}_{23}\text{FN}_2\text{O}_2\text{SNa}^+$   $[\text{M}+\text{Na}]^+$  433.1356, found 433.1356.

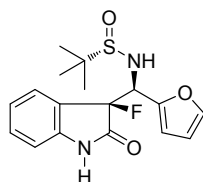

**(S)-N-(((S)-3-fluoro-2-oxoindolin-3-yl)(furan-2-yl)methyl)-2-methylpropane-2-sulfonamide (11an)**

White solid, 140.4 mg (80% yield),  $R_f = 0.17$  (hexanes/ethyl acetate = 1:1), m.p. 154–155 °C,  $[\alpha]_{20}^D = +72.7$  ( $c = 0.20$ ,  $\text{CH}_2\text{Cl}_2$ ).  $^1\text{H NMR}$  (400 MHz,  $\text{CDCl}_3$ )  $\delta$  9.82 (s, 1H), 7.26 (dd,  $J = 1.7,$



0.7 Hz, 1H), 7.22 – 7.13 (m, 2H), 6.96 (t,  $J = 7.6$  Hz, 1H), 6.81 (d,  $J = 7.8$  Hz, 1H), 6.27 (d,  $J = 3.2$  Hz, 1H), 6.24 (dd,  $J = 3.3, 1.8$  Hz, 1H), 5.32 (t,  $J = 7.2$  Hz, 1H), 4.94 (d,  $J = 7.4$  Hz, 1H), 1.16 (s, 9H);  $^{19}\text{F}$  NMR (376 MHz,  $\text{CDCl}_3$ )  $\delta$  -156.74 (s, 1F);  $^{13}\text{C}$  NMR (101 MHz,  $\text{CDCl}_3$ )  $\delta$  173.3 (d,  $J = 20.9$  Hz), 148.9 (d,  $J = 4.6$  Hz), 143.0 (d,  $J = 5.4$  Hz), 142.7, 131.8 (d,  $J = 2.8$  Hz), 125.7, 122.9 (d,  $J = 18.4$  Hz), 122.7 (d,  $J = 2.6$  Hz), 111.2, 110.7, 109.7 (d,  $J = 1.5$  Hz), 91.6 (d,  $J = 197.1$  Hz), 57.3 (d,  $J = 32.1$  Hz), 56.8, 22.4. IR ( $\text{cm}^{-1}$ ): 1722, 1623, 1473, 1206, 1037, 1012, 792, 752, 732. HRMS (TOF MS ESI): calcd for  $\text{C}_{17}\text{H}_{19}\text{FN}_2\text{O}_3\text{SNa}^+ [\text{M}+\text{Na}]^+$  373.0993, found 373.0998.

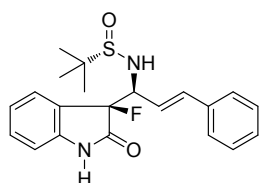

**(S)-N-((S,E)-1-((S)-3-fluoro-2-oxoindolin-3-yl)-3-phenylallyl)-2-methylpropane-2-sulfonamide (11ao)**

White solid, 168.4 mg (87% yield),  $R_f = 0.14$  (hexanes/ethyl acetate = 1:1), m.p. 181–182 °C,  $[\alpha]_{20}^D = -88.7$  ( $c = 0.37$ ,  $\text{CH}_2\text{Cl}_2$ ).  $^1\text{H}$  NMR (400 MHz,  $\text{CDCl}_3$ )  $\delta$  9.57 (s, 1H), 7.40 (d,  $J = 7.5$  Hz, 1H), 7.30 – 7.18 (m, 6H), 7.01 (t,  $J = 7.6$  Hz, 1H), 6.82 (d,  $J = 7.8$  Hz, 1H), 6.60 (d,  $J = 15.8$  Hz, 1H), 6.03 (dd,  $J = 15.8, 6.9$  Hz, 1H), 4.83 (q,  $J = 6.4$  Hz, 1H), 4.49 (d,  $J = 6.0$  Hz, 1H), 1.20 (s, 9H);  $^{19}\text{F}$  NMR (376 MHz,  $\text{CDCl}_3$ )  $\delta$  -159.35 (s, 1F);  $^{13}\text{C}$  NMR (101 MHz,  $\text{CDCl}_3$ )  $\delta$  173.3 (d,  $J = 21.2$  Hz), 142.8 (d,  $J = 5.5$  Hz), 136.0, 135.7, 131.9 (d,  $J = 2.8$  Hz), 128.7, 128.3, 126.8, 125.5, 123.6 (d,  $J = 18.5$  Hz), 123.0 (d,  $J = 2.3$  Hz), 122.5 (d,  $J = 4.0$  Hz), 111.2, 92.4 (d,  $J = 197.8$  Hz), 61.0 (d,  $J = 28.8$  Hz), 56.6, 22.7. IR ( $\text{cm}^{-1}$ ): 1730, 1622, 1470, 1200, 1056, 973, 751. HRMS (TOF MS ESI): calcd for  $\text{C}_{21}\text{H}_{23}\text{FN}_2\text{O}_2\text{SNa}^+ [\text{M}+\text{Na}]^+$  409.1356, found 409.1351.

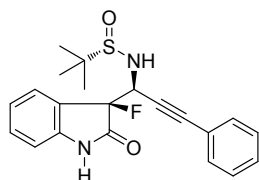

**(S)-N-((S)-1-((S)-3-fluoro-2-oxoindolin-3-yl)-3-phenylprop-2-yn-1-yl)-2-methylpropane-2-sulfonamide (11ap)**

White solid, 161.7 mg (84% yield),  $R_f = 0.14$  (hexanes/ethyl acetate = 1:1), m.p. 218–219 °C,  $[\alpha]_{20}^D = +155.4$  ( $c = 0.40$ ,  $\text{CH}_2\text{Cl}_2$ ).  $^1\text{H}$  NMR (400 MHz, MeOD)  $\delta$  7.84 (d,  $J = 7.6$  Hz, 1H), 7.56 – 7.51 (m, 2H), 7.43 – 7.35 (m, 4H), 7.11 (t,  $J = 7.6$  Hz, 1H), 6.90 (d,  $J = 7.8$  Hz, 1H), 5.04 (d,  $J = 4.4$  Hz, 1H), 4.90 (s, 2H), 0.97 (s, 9H);  $^{19}\text{F}$  NMR (376 MHz, MeOD)  $\delta$  -155.07 (s, 1F);  $^{13}\text{C}$  NMR (101 MHz, MeOD)  $\delta$  174.4 (d,  $J = 20.1$  Hz), 145.4 (d,  $J = 5.6$  Hz), 133.3 (d,  $J = 3.1$  Hz), 132.8, 130.2, 129.6, 128.0, 124.6 (d,  $J = 18.1$  Hz), 123.8 (d,  $J = 2.7$  Hz), 123.3, 111.9 (d,  $J = 1.0$  Hz), 92.7 (d,  $J = 193.7$  Hz), 89.8, 84.3, 57.0, 51.2 (d,  $J = 36.1$  Hz), 22.8. IR ( $\text{cm}^{-1}$ ): 1724, 1625, 1471, 1338, 1204, 1043, 759, 749. HRMS (TOF MS ESI): calcd for  $\text{C}_{21}\text{H}_{21}\text{FN}_2\text{O}_2\text{SNa}^+ [\text{M}+\text{Na}]^+$  407.1200, found 407.1210.

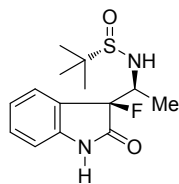

**(S)-N-((S)-1-((S)-3-fluoro-2-oxindolin-3-yl)ethyl)-2-methylpropane-2-sulfinamide (11aq)**

White solid, 128.4 mg (86% yield),  $R_f = 0.24$  (hexanes/ethyl acetate = 1:2), m.p. 190–191 °C,  $[\alpha]_{20}^D = +64.3$  ( $c = 0.51$ ,  $\text{CH}_2\text{Cl}_2$ ).  $^1\text{H NMR}$  (400 MHz,  $\text{CDCl}_3$ )  $\delta$  9.77 (s, 1H), 7.37 (d,  $J = 7.5$  Hz, 1H), 7.30 – 7.24 (m, 1H), 7.03 (t,  $J = 7.6$  Hz, 1H), 6.90 (d,  $J = 7.8$  Hz, 1H), 4.51 (d,  $J = 7.1$  Hz, 1H), 4.22 – 4.12 (m, 1H), 1.21 (d,  $J = 6.7$  Hz, 3H), 1.18 (s, 9H);  $^{19}\text{F NMR}$  (376 MHz,  $\text{CDCl}_3$ )  $\delta$  -160.09 (s, 1F);  $^{13}\text{C NMR}$  (101 MHz,  $\text{CDCl}_3$ )  $\delta$  173.7 (d,  $J = 21.1$  Hz), 143.0 (d,  $J = 5.6$  Hz), 131.7 (d,  $J = 2.8$  Hz), 125.1, 124.1 (d,  $J = 18.4$  Hz), 123.0 (d,  $J = 2.5$  Hz), 111.3, 93.0 (d,  $J = 194.0$  Hz), 56.2, 55.2 (d,  $J = 28.2$  Hz), 22.6, 16.4 (d,  $J = 3.5$  Hz). IR ( $\text{cm}^{-1}$ ): 1716, 1623, 1473, 1340, 1204, 1057, 1028, 763. HRMS (TOF MS ESI): calcd for  $\text{C}_{14}\text{H}_{19}\text{FN}_2\text{O}_2\text{SNa}^+$   $[\text{M}+\text{Na}]^+$  321.1043, found 321.1045.

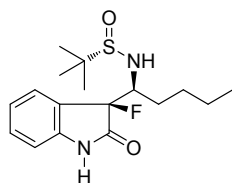

**(S)-N-((S)-1-((S)-3-fluoro-2-oxindolin-3-yl)pentyl)-2-methylpropane-2-sulfinamide (11ar)**

White solid, 127.5 mg (75% yield),  $R_f = 0.17$  (hexanes/ethyl acetate = 1:1), m.p. 81–82 °C,  $[\alpha]_{20}^D = +41.6$  ( $c = 0.15$ ,  $\text{CH}_2\text{Cl}_2$ ).  $^1\text{H NMR}$  (400 MHz,  $\text{CDCl}_3$ )  $\delta$  9.75 (s, 1H), 7.35 (d,  $J = 7.4$  Hz, 1H), 7.24 (t,  $J = 7.8$  Hz, 1H), 7.00 (t,  $J = 7.6$  Hz, 1H), 6.91 (d,  $J = 7.8$  Hz, 1H), 4.80 (d,  $J = 8.3$  Hz, 1H), 3.95 – 3.85 (m, 1H), 1.43 – 1.06 (m, 15H), 0.76 (t,  $J = 7.2$  Hz, 3H);  $^{19}\text{F NMR}$  (376 MHz,  $\text{CDCl}_3$ )  $\delta$  -155.94 (s, 1F);  $^{13}\text{C NMR}$  (101 MHz,  $\text{CDCl}_3$ )  $\delta$  174.2 (d,  $J = 21.2$  Hz), 143.0 (d,  $J = 5.4$  Hz), 131.7 (d,  $J = 2.9$  Hz), 124.9, 124.5 (d,  $J = 18.4$  Hz), 123.1 (d,  $J = 2.4$  Hz), 111.5, 91.9 (d,  $J = 194.1$  Hz), 60.6 (d,  $J = 26.6$  Hz), 57.0, 30.4 (d,  $J = 2.8$  Hz), 28.1, 23.0, 22.1, 13.9. IR ( $\text{cm}^{-1}$ ): 1733, 1624, 1472, 1207, 1047, 746. HRMS (TOF MS ESI): calcd for  $\text{C}_{17}\text{H}_{25}\text{FN}_2\text{O}_2\text{SNa}^+$   $[\text{M}+\text{Na}]^+$  363.1513, found 363.1526.

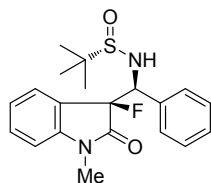

**(S)-N-((S)-1-((S)-3-fluoro-1-methyl-2-oxindolin-3-yl)(phenyl)methyl)-2-methylpropane-2-sulfinamide (11bi)**

White solid, 153.6 mg (82% yield),  $R_f = 0.29$  (hexanes/ethyl acetate = 1:1), m.p. 147–148 °C,  $[\alpha]_{20}^D = +78.8$  ( $c = 0.07$ ,  $\text{CH}_2\text{Cl}_2$ ).  $^1\text{H NMR}$  (400 MHz,  $\text{CDCl}_3$ )  $\delta$  7.38 (d,  $J = 7.4$  Hz, 1H), 7.29 – 7.23 (m, 1H), 7.17 – 7.02 (m, 6H), 6.53 (d,  $J = 7.9$  Hz, 1H), 5.19 (dd,  $J = 7.3, 4.3$  Hz, 1H), 4.83 (d,  $J = 3.2$  Hz, 1H), 2.95 (s, 3H), 1.24 (s, 9H);  $^{19}\text{F NMR}$  (376 MHz,  $\text{CDCl}_3$ )  $\delta$  -162.03 (s, 1F);  $^{13}\text{C NMR}$  (101 MHz,  $\text{CDCl}_3$ )  $\delta$  171.2 (d,  $J = 22.1$  Hz), 144.1 (d,  $J = 5.3$  Hz), 134.6 (d,  $J = 5.3$  Hz),

131.8 (d,  $J = 2.7$  Hz), 128.8, 128.4, 127.9, 125.1, 123.5 (d,  $J = 18.6$  Hz), 123.2 (d,  $J = 2.4$  Hz), 108.7, 92.9 (d,  $J = 199.6$  Hz), 63.0 (d,  $J = 26.4$  Hz), 56.5, 26.0, 22.7. IR (cm<sup>-1</sup>): 1718, 1707, 1617, 1379, 1070, 700. HRMS (TOF MS ESI): calcd for C<sub>20</sub>H<sub>23</sub>FN<sub>2</sub>O<sub>2</sub>SNa<sup>+</sup> [M+Na]<sup>+</sup> 397.1356, found 397.1354.

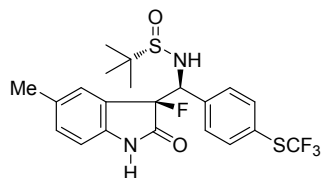

**(S)-N-((S)-((S)-3-fluoro-5-methyl-2-oxoindolin-3-yl)(4-((trifluoromethyl)thio)phenyl)methyl)-2-methylpropane-2-sulfinamide (13a)**

White solid, 201.4 mg (85% yield),  $R_f = 0.31$  (hexanes/ethyl acetate = 1:1), m.p. 95–96 °C,  $[\alpha]_{20}^D = -4.8$  ( $c = 0.25$ , CH<sub>2</sub>Cl<sub>2</sub>). <sup>1</sup>H NMR (400 MHz, CDCl<sub>3</sub>)  $\delta$  9.24 (s, 1H), 7.44 (d,  $J = 8.2$  Hz, 2H), 7.21 (d,  $J = 8.3$  Hz, 2H), 6.98 – 6.92 (m, 2H), 6.52 (dd,  $J = 8.4, 0.8$  Hz, 1H), 5.19 (dd,  $J = 7.5, 5.6$  Hz, 1H), 4.99 (d,  $J = 5.2$  Hz, 1H), 2.24 (s, 3H), 1.19 (s, 9H); <sup>19</sup>F NMR (376 MHz, CDCl<sub>3</sub>)  $\delta$  -42.54 (s, 3F), -158.52 (s, 1F); <sup>13</sup>C NMR (101 MHz, CDCl<sub>3</sub>)  $\delta$  173.0 (d,  $J = 21.4$  Hz), 139.8 (d,  $J = 5.7$  Hz), 138.0 (d,  $J = 3.9$  Hz), 135.6, 132.6 (d,  $J = 2.6$  Hz), 132.4 (d,  $J = 2.7$  Hz), 129.9, 129.5 (q,  $J = 308.1$  Hz), 126.2, 124.6 (d,  $J = 2.0$  Hz), 122.8 (d,  $J = 18.5$  Hz), 110.8, 92.8 (d,  $J = 199.6$  Hz), 62.4 (d,  $J = 28.1$  Hz), 56.7, 22.5, 21.1. IR (cm<sup>-1</sup>): 1724, 1495, 1161, 1116, 906, 729. HRMS (TOF MS ESI): calcd for C<sub>21</sub>H<sub>22</sub>F<sub>4</sub>N<sub>2</sub>O<sub>2</sub>S<sub>2</sub>Na<sup>+</sup> [M+Na]<sup>+</sup> 497.0951, found 497.0959.

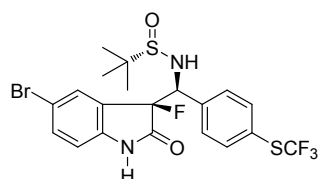

**(S)-N-((S)-((S)-5-bromo-3-fluoro-2-oxoindolin-3-yl)(4-((trifluoromethyl)thio)phenyl)methyl)-2-methylpropane-2-sulfinamide (13b)**

White solid, 248.4 mg (92% yield),  $R_f = 0.30$  (hexanes/ethyl acetate = 1:1), m.p. 152–153 °C,  $[\alpha]_{20}^D = -54.6$  ( $c = 0.52$ , CH<sub>2</sub>Cl<sub>2</sub>). <sup>1</sup>H NMR (400 MHz, CDCl<sub>3</sub>)  $\delta$  9.80 (s, 1H), 7.47 (d,  $J = 8.2$  Hz, 2H), 7.32 – 7.27 (m, 2H), 7.23 (d,  $J = 8.3$  Hz, 2H), 6.56 (d,  $J = 8.6$  Hz, 1H), 5.20 (dd,  $J = 7.7, 5.9$  Hz, 1H), 5.07 (d,  $J = 5.6$  Hz, 1H), 1.18 (s, 9H); <sup>19</sup>F NMR (376 MHz, CDCl<sub>3</sub>)  $\delta$  -42.40 (s, 3F), -158.28 (s, 1F); <sup>13</sup>C NMR (101 MHz, CDCl<sub>3</sub>)  $\delta$  172.5 (d,  $J = 21.2$  Hz), 141.6 (d,  $J = 5.5$  Hz), 137.4 (d,  $J = 4.1$  Hz), 135.8, 134.9 (d,  $J = 2.2$  Hz), 129.8, 129.4 (q,  $J = 308.3$  Hz), 128.7, 125.0 (q,  $J = 1.9$  Hz), 124.8 (d,  $J = 18.5$  Hz), 115.3 (d,  $J = 3.0$  Hz), 112.8, 92.3 (d,  $J = 200.9$  Hz), 62.4 (d,  $J = 27.9$  Hz), 56.8, 22.5. IR (cm<sup>-1</sup>): 1735, 1619, 1474, 1114, 1084, 1015. HRMS (TOF MS ESI): calcd for C<sub>20</sub>H<sub>19</sub>BrF<sub>4</sub>N<sub>2</sub>O<sub>2</sub>S<sub>2</sub>Na<sup>+</sup> [M+Na]<sup>+</sup> 560.9900, found 560.9908.

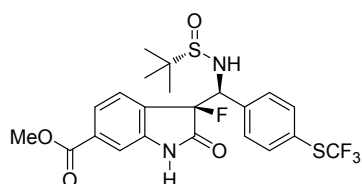

**(S)-methyl**

**3-((S)-((S)-1,1-dimethylethylsulfinamido)(4-**

**((trifluoromethyl)thio)phenyl)methyl)-3-fluoro-2-oxoindoline-6-carboxylate (13c)**

White solid, 204.6 mg (79% yield),  $R_f = 0.27$  (hexanes/ethyl acetate = 1:1), m.p. 113–114 °C,  $[\alpha]_{20}^D = +42.0$  ( $c = 0.10$ ,  $\text{CH}_2\text{Cl}_2$ ).  $^1\text{H NMR}$  (400 MHz,  $\text{CDCl}_3$ )  $\delta$  9.82 (s, 1H), 7.63 (d,  $J = 7.8$  Hz, 1H), 7.50 (d,  $J = 8.2$  Hz, 2H), 7.33 – 7.27 (m, 3H), 7.14 (d,  $J = 7.9$  Hz, 1H), 5.28 (t,  $J = 7.0$  Hz, 1H), 5.04 (d,  $J = 4.3$  Hz, 1H), 3.79 (s, 3H), 1.19 (s, 9H);  $^{19}\text{F NMR}$  (376 MHz,  $\text{CDCl}_3$ )  $\delta$  -42.45 (s, 3F), -158.50 (s, 1F);  $^{13}\text{C NMR}$  (101 MHz,  $\text{CDCl}_3$ )  $\delta$  172.7 (d,  $J = 21.0$  Hz), 165.9, 143.1 (d,  $J = 5.4$  Hz), 137.6 (d,  $J = 2.6$  Hz), 135.8, 133.3, 129.8, 129.4 (q,  $J = 308.2$  Hz), 127.3 (d,  $J = 18.1$  Hz), 125.8, 125.0, 124.2, 111.9, 92.3 (d,  $J = 200.2$  Hz), 62.4 (d,  $J = 28.4$  Hz), 57.0, 52.5, 22.5. IR ( $\text{cm}^{-1}$ ): 1723, 1631, 1456, 1283, 1221, 1116, 1086, 907, 729. HRMS (TOF MS ESI): calcd for  $\text{C}_{22}\text{H}_{22}\text{F}_4\text{N}_2\text{O}_4\text{S}_2\text{Na}^+$   $[\text{M}+\text{Na}]^+$  541.0849, found 541.0859.

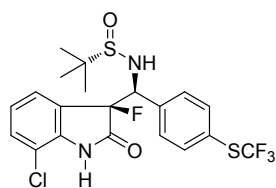

**(S)-N-((S)-((S)-7-chloro-3-fluoro-2-oxoindolin-3-yl)(4-((trifluoromethyl)thio)phenyl)methyl)-2-methylpropane-2-sulfinamide (13d)**

White solid, 225.6 mg (91% yield),  $R_f = 0.46$  (hexanes/ethyl acetate = 1:1), m.p. 164–165 °C,  $[\alpha]_{20}^D = +103.4$  ( $c = 0.70$ ,  $\text{CH}_2\text{Cl}_2$ ).  $^1\text{H NMR}$  (400 MHz,  $\text{CDCl}_3$ )  $\delta$  9.75 (s, 1H), 7.47 (d,  $J = 8.2$  Hz, 2H), 7.30 – 7.23 (m, 3H), 7.18 (d,  $J = 8.3$  Hz, 1H), 7.00 (t,  $J = 7.8$  Hz, 1H), 5.35 (dd,  $J = 7.9$ , 4.7 Hz, 1H), 5.19 (d,  $J = 4.0$  Hz, 1H), 1.25 (s, 9H);  $^{19}\text{F NMR}$  (376 MHz,  $\text{CDCl}_3$ )  $\delta$  -42.53 (s, 3F), -158.50 (s, 1F);  $^{13}\text{C NMR}$  (101 MHz,  $\text{CDCl}_3$ )  $\delta$  172.4 (d,  $J = 21.5$  Hz), 140.0 (d,  $J = 5.6$  Hz), 137.3 (d,  $J = 4.7$  Hz), 135.7, 131.9 (d,  $J = 2.3$  Hz), 129.9, 129.4 (q,  $J = 308.2$  Hz), 124.9 (q,  $J = 2.0$  Hz), 124.6 (d,  $J = 18.8$  Hz), 123.9 (d,  $J = 2.0$  Hz), 123.8, 116.2, 93.1 (d,  $J = 201.3$  Hz), 62.3 (d,  $J = 27.5$  Hz), 56.7, 22.5. IR ( $\text{cm}^{-1}$ ): 1735, 1623, 1476, 1118, 1074, 845, 796, 737. HRMS (TOF MS ESI): calcd for  $\text{C}_{20}\text{H}_{19}\text{ClF}_4\text{N}_2\text{O}_2\text{S}_2\text{Na}^+$   $[\text{M}+\text{Na}]^+$  517.0405, found 517.0426.

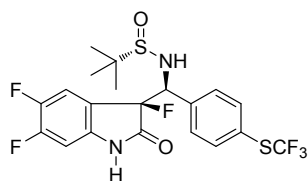

**(S)-2-methyl-N-((S)-((S)-3,5,6-trifluoro-2-oxoindolin-3-yl)(4-((trifluoromethyl)thio)phenyl)methyl)propane-2-sulfinamide (13e)**

White solid, 206.2 mg (83% yield),  $R_f = 0.35$  (hexanes/ethyl acetate = 1:1), m.p. 191–192 °C,  $[\alpha]_{20}^D = +61.0$  ( $c = 0.12$ ,  $\text{CH}_2\text{Cl}_2$ ).  $^1\text{H NMR}$  (400 MHz, MeOD)  $\delta$  7.57 (d,  $J = 8.2$  Hz, 2H), 7.46 (ddd,  $J = 9.4$ , 7.9, 1.6 Hz, 1H), 7.35 (d,  $J = 8.3$  Hz, 2H), 6.61 (ddd,  $J = 10.0$ , 6.4, 0.7 Hz, 1H), 5.37 (d,  $J = 8.9$  Hz, 1H), 4.86 (s, 2H), 1.21 (s, 9H);  $^{19}\text{F NMR}$  (376 MHz, MeOD)  $\delta$  -44.60 (s, 3F), -133.73 (dd,  $J = 19.2$ , 5.2 Hz, 1F), -147.03 (d,  $J = 19.2$  Hz, 1F), -158.05 (d,  $J = 5.1$  Hz, 1F);  $^{13}\text{C NMR}$  (101 MHz, MeOD)  $\delta$  174.4 (d,  $J = 21.2$  Hz), 153.9 (ddd,  $J = 251.0$ , 14.0, 2.9 Hz), 147.8 (ddd,  $J = 243.0$ , 13.6, 3.0 Hz), 141.0 – 140.8 (m), 140.0 (d,  $J = 5.1$  Hz), 137.0, 131.0, 131.0 (q,  $J = 306.9$  Hz), 125.8 (q,  $J = 2.0$  Hz), 120.4 (ddd,  $J = 19.0$ , 6.4, 4.1 Hz), 116.9 (d,  $J = 21.1$  Hz), 101.8

(d,  $J = 23.3$  Hz), 93.1 (d,  $J = 199.3$  Hz), 63.7 (d,  $J = 28.4$  Hz), 57.9, 22.7. IR ( $\text{cm}^{-1}$ ): 1734, 1633, 1503, 1471, 1347, 1131, 1117, 1085, 1045, 777, 719. HRMS (TOF MS ESI): calcd for  $\text{C}_{20}\text{H}_{18}\text{F}_6\text{N}_2\text{O}_2\text{S}_2\text{Na}^+$   $[\text{M}+\text{Na}]^+$  519.0606, found 519.0629.

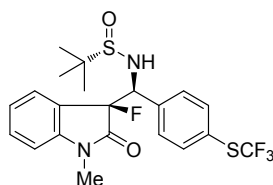

**(S)-N-((S)-((S)-3-fluoro-1-methyl-2-oxoindolin-3-yl)(4-((trifluoromethyl)thio)phenyl)methyl)-2-methylpropane-2-sulfinamide (13f)**

White solid, 206.5 mg (87% yield),  $R_f = 0.32$  (hexanes/ethyl acetate = 1:1), m.p. 143–144 °C,  $[\alpha]_{20}^D = +56.4$  ( $c = 0.55$ ,  $\text{CH}_2\text{Cl}_2$ ).  $^1\text{H}$  NMR (400 MHz,  $\text{CDCl}_3$ )  $\delta$  7.43 – 7.37 (m, 3H), 7.30 (tt,  $J = 7.8, 1.2$  Hz, 1H), 7.14 – 7.07 (m,  $J = 7.9$  Hz, 3H), 6.53 (d,  $J = 7.9$  Hz, 1H), 5.24 (dd,  $J = 6.9, 4.4$  Hz, 1H), 4.93 (d,  $J = 3.3$  Hz, 1H), 2.92 (s, 3H), 1.26 (s, 9H);  $^{19}\text{F}$  NMR (376 MHz,  $\text{CDCl}_3$ )  $\delta$  -42.77 (s, 3F), -163.42 (s, 1F);  $^{13}\text{C}$  NMR (101 MHz,  $\text{CDCl}_3$ )  $\delta$  170.7 (d,  $J = 22.0$  Hz), 143.8 (d,  $J = 5.3$  Hz), 137.8 (d,  $J = 5.2$  Hz), 135.4, 132.0 (d,  $J = 2.6$  Hz), 129.6, 129.4 (q,  $J = 308.2$  Hz), 124.9, 124.5 (q,  $J = 2.0$  Hz), 123.3 (d,  $J = 2.4$  Hz), 122.9 (d,  $J = 18.7$  Hz), 108.7, 92.5 (d,  $J = 201.7$  Hz), 62.6 (d,  $J = 26.9$  Hz), 56.5, 25.8, 22.6. IR ( $\text{cm}^{-1}$ ): 1715, 1612, 1462, 1117, 1079, 1055, 1016, 754, 699. HRMS (TOF MS ESI): calcd for  $\text{C}_{21}\text{H}_{22}\text{F}_4\text{N}_2\text{O}_2\text{S}_2\text{Na}^+$   $[\text{M}+\text{Na}]^+$  497.0951, found 497.0964.

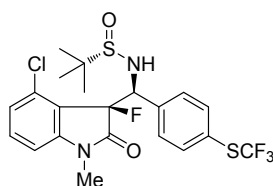

**(S)-N-((S)-((S)-4-chloro-3-fluoro-1-methyl-2-oxoindolin-3-yl)(4-((trifluoromethyl)thio)phenyl)methyl)-2-methylpropane-2-sulfinamide (13g)**

White solid, 218.7 mg (86% yield),  $R_f = 0.50$  (hexanes/ethyl acetate = 1:1), m.p. 165–166 °C,  $[\alpha]_{20}^D = +45.8$  ( $c = 0.26$ ,  $\text{CH}_2\text{Cl}_2$ ).  $^1\text{H}$  NMR (400 MHz,  $\text{CDCl}_3$ )  $\delta$  7.45 (d,  $J = 8.2$  Hz, 2H), 7.29 (dd,  $J = 8.0, 1.7$  Hz, 1H), 7.15 (d,  $J = 8.3$  Hz, 2H), 7.07 (dd,  $J = 7.9, 1.4$  Hz, 1H), 6.55 (s, 1H), 5.23 (dd,  $J = 6.8, 4.7$  Hz, 1H), 4.83 (d,  $J = 3.9$  Hz, 1H), 2.93 (s, 3H), 1.25 (s, 9H);  $^{19}\text{F}$  NMR (376 MHz,  $\text{CDCl}_3$ )  $\delta$  -42.68 (s, 3F), -161.98 (s, 1F);  $^{13}\text{C}$  NMR (101 MHz,  $\text{CDCl}_3$ )  $\delta$  170.6 (d,  $J = 22.0$  Hz), 145.2 (d,  $J = 5.2$  Hz), 138.1 (d,  $J = 3.0$  Hz), 137.5 (d,  $J = 4.7$  Hz), 135.6, 129.6, 129.4 (q,  $J = 308.1$  Hz), 126.1, 124.9 (q,  $J = 1.8$  Hz), 123.2 (d,  $J = 2.3$  Hz), 121.1 (d,  $J = 19.0$  Hz), 109.5, 92.1 (d,  $J = 201.9$  Hz), 62.3 (d,  $J = 27.0$  Hz), 56.6, 26.0, 22.5. IR ( $\text{cm}^{-1}$ ): 1726, 1609, 1496, 1380, 1114, 1062, 1009, 907, 730. HRMS (TOF MS ESI): calcd for  $\text{C}_{21}\text{H}_{21}\text{ClF}_4\text{N}_2\text{O}_2\text{S}_2\text{Na}^+$   $[\text{M}+\text{Na}]^+$  531.0561, found 531.0579.

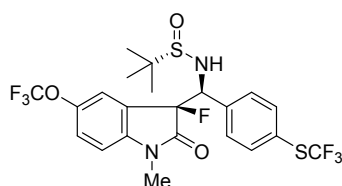

**(S)-N-((S)-((S)-3-fluoro-1-methyl-2-oxo-5-(trifluoromethoxy)indolin-3-yl)(4-((trifluoromethyl)thio)phenyl)methyl)-2-methylpropane-2-sulfinamide (13h)**

White solid, 234.3 mg (84% yield),  $R_f = 0.37$  (hexanes/ethyl acetate = 1:1), m.p. 126–127 °C,  $[\alpha]_{20}^D = +38.8$  ( $c = 0.49$ ,  $\text{CH}_2\text{Cl}_2$ ).  $^1\text{H NMR}$  (400 MHz,  $\text{CDCl}_3$ )  $\delta$  7.38 (d,  $J = 8.2$  Hz, 2H), 7.27 (s, 1H), 7.13 (d,  $J = 8.5$  Hz, 1H), 7.07 (d,  $J = 8.3$  Hz, 2H), 6.50 (dd,  $J = 8.5, 0.9$  Hz, 1H), 5.20 (dd,  $J = 7.5, 4.4$  Hz, 1H), 4.84 (d,  $J = 4.1$  Hz, 1H), 2.91 (s, 3H), 1.22 (s, 9H);  $^{19}\text{F NMR}$  (376 MHz,  $\text{CDCl}_3$ )  $\delta$  -42.83 (s, 3F), -58.61 (s, 3F), -163.85 (s, 1F);  $^{13}\text{C NMR}$  (101 MHz,  $\text{CDCl}_3$ )  $\delta$  170.5 (d,  $J = 22.1$  Hz), 145.0 – 144.8 (m), 142.5 (d,  $J = 5.0$  Hz), 137.4 (d,  $J = 5.2$  Hz), 135.7, 129.5, 129.4 (q,  $J = 308.1$  Hz), 125.3 (d,  $J = 0.9$  Hz), 125.1 (q,  $J = 2.0$  Hz), 124.3 (d,  $J = 18.8$  Hz), 120.5 (q,  $J = 257.5$  Hz), 119.2, 109.5, 92.2 (d,  $J = 203.5$  Hz), 62.7 (d,  $J = 26.8$  Hz), 56.7, 26.0, 22.6. IR ( $\text{cm}^{-1}$ ): 1728, 1624, 1495, 1471, 1367, 1254, 1215, 1158, 1111, 1074, 1016, 732. HRMS (TOF MS ESI): calcd for  $\text{C}_{22}\text{H}_{21}\text{F}_7\text{N}_2\text{O}_3\text{S}_2\text{Na}^+$   $[\text{M}+\text{Na}]^+$  581.0774, found 581.0785.

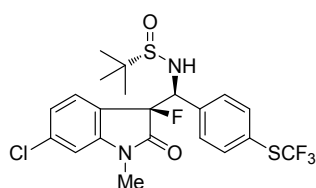

**(S)-N-((S)-((S)-6-chloro-3-fluoro-1-methyl-2-oxoindolin-3-yl)(4-((trifluoromethyl)thio)phenyl)methyl)-2-methylpropane-2-sulfinamide (13i)**

White solid, 229.2 mg (90% yield),  $R_f = 0.50$  (hexanes/ethyl acetate = 1:1), m.p. 171–172 °C,  $[\alpha]_{20}^D = +41.6$  ( $c = 0.38$ ,  $\text{CH}_2\text{Cl}_2$ ).  $^1\text{H NMR}$  (400 MHz,  $\text{CDCl}_3$ )  $\delta$  7.45 (d,  $J = 8.2$  Hz, 2H), 7.29 (dd,  $J = 7.9, 1.8$  Hz, 1H), 7.13 (d,  $J = 8.3$  Hz, 2H), 7.08 (dd,  $J = 7.9, 1.2$  Hz, 1H), 6.55 (s, 1H), 5.21 (dd,  $J = 6.8, 4.5$  Hz, 1H), 4.76 (d,  $J = 3.3$  Hz, 1H), 2.93 (s, 3H), 1.25 (s, 9H);  $^{19}\text{F NMR}$  (376 MHz,  $\text{CDCl}_3$ )  $\delta$  -42.66 (s, 3F), -162.23 (s, 1F);  $^{13}\text{C NMR}$  (101 MHz,  $\text{CDCl}_3$ )  $\delta$  170.7 (d,  $J = 22.0$  Hz), 145.3 (d,  $J = 5.2$  Hz), 138.2 (d,  $J = 3.0$  Hz), 137.5 (d,  $J = 4.8$  Hz), 135.7, 129.7, 129.5 (q,  $J = 308.2$  Hz), 126.1, 125.0 (q,  $J = 2.0$  Hz), 123.3 (d,  $J = 2.4$  Hz), 121.2 (d,  $J = 19.0$  Hz), 109.6, 92.2 (d,  $J = 202.1$  Hz), 62.4 (d,  $J = 26.9$  Hz), 56.7, 26.0, 22.6. IR ( $\text{cm}^{-1}$ ): 1722, 1623, 1473, 1340, 1206, 1037, 1012, 752, 732. HRMS (TOF MS ESI): calcd for  $\text{C}_{21}\text{H}_{21}\text{ClF}_4\text{N}_2\text{O}_2\text{S}_2\text{Na}^+$   $[\text{M}+\text{Na}]^+$  531.0561, found 531.0567.

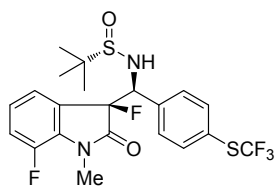

**(S)-N-((S)-((S)-3,7-difluoro-2-oxoindolin-3-yl)(4-((trifluoromethyl)thio)phenyl)methyl)-2-methylpropane-2-sulfinamide (13j)**

Colorless oil, 226.7 mg (92% yield),  $R_f = 0.51$  (hexanes/ethyl acetate = 1:1),  $[\alpha]_{20}^D = +44.5$  ( $c = 0.46$ ,  $\text{CH}_2\text{Cl}_2$ ).  $^1\text{H NMR}$  (400 MHz,  $\text{CDCl}_3$ )  $\delta$  7.41 (d,  $J = 8.2$  Hz, 2H), 7.24 – 7.19 (m, 1H), 7.09 – 6.98 (m, 4H), 5.19 (dd,  $J = 7.0, 4.1$  Hz, 1H), 4.90 (d,  $J = 3.2$  Hz, 1H), 3.11 (d,  $J = 2.4$  Hz, 3H), 1.26 (s, 9H);  $^{19}\text{F NMR}$  (376 MHz,  $\text{CDCl}_3$ )  $\delta$  -42.76 (s, 3F), -135.00 (s, 1F), -162.39 (s, 1F);  $^{13}\text{C NMR}$  (101 MHz,  $\text{CDCl}_3$ )  $\delta$  170.3 (d,  $J = 21.9$  Hz), 147.5 (d,  $J = 246.5$  Hz), 137.4 (d,  $J = 5.3$  Hz), 135.7, 130.5 (dd,  $J = 8.9, 5.3$  Hz), 129.7, 129.5 (q,  $J = 308.2$  Hz), 125.8 (dd,  $J = 18.9, 3.1$  Hz),

125.1 (q,  $J = 2.1$  Hz), 124.3 (dd,  $J = 6.3, 2.3$  Hz), 120.9 (d,  $J = 3.3$  Hz), 120.1 (dd,  $J = 19.3, 2.4$  Hz), 92.4 (dd,  $J = 202.5, 2.5$  Hz), 62.7 (d,  $J = 26.7$  Hz), 56.7, 28.4 (d,  $J = 5.8$  Hz), 22.7. IR (cm<sup>-1</sup>): 1727, 1634, 1481, 1373, 1244, 1114, 1078, 731. HRMS (TOF MS ESI): calcd for C<sub>21</sub>H<sub>21</sub>F<sub>5</sub>N<sub>2</sub>O<sub>2</sub>S<sub>2</sub>Na<sup>+</sup> [M+Na]<sup>+</sup> 515.0857, found 515.0865.

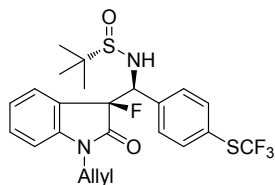

**(S)-N-((S)-((S)-1-allyl-3-fluoro-2-oxoindolin-3-yl)(4-((trifluoromethyl)thio)phenyl)methyl)-2-methylpropane-2-sulfinamide (13k)**

White solid, 217.9 mg (87% yield),  $R_f = 0.49$  (hexanes/ethyl acetate = 1:1), m.p. 116–117 °C,  $[\alpha]_{20}^D = +45.8$  (c = 0.72, CH<sub>2</sub>Cl<sub>2</sub>). <sup>1</sup>H NMR (400 MHz, CDCl<sub>3</sub>)  $\delta$  7.46 (d,  $J = 7.4$  Hz, 1H), 7.35 (d,  $J = 8.2$  Hz, 2H), 7.23 (t,  $J = 7.8$  Hz, 1H), 7.12 – 7.05 (m, 3H), 6.51 (d,  $J = 7.9$  Hz, 1H), 5.38 (ddd,  $J = 22.4, 10.4, 5.3$  Hz, 1H), 5.24 (dd,  $J = 6.7, 4.0$  Hz, 1H), 5.05 (d,  $J = 2.4$  Hz, 1H), 4.98 (d,  $J = 10.4$  Hz, 1H), 4.71 (d,  $J = 17.4$  Hz, 1H), 4.27 – 4.17 (m, 1H), 3.85 (dd,  $J = 16.4, 5.5$  Hz, 1H), 1.24 (s, 9H); <sup>19</sup>F NMR (376 MHz, CDCl<sub>3</sub>)  $\delta$  -42.62 (s, 3F), -160.63 (s, 1F); <sup>13</sup>C NMR (101 MHz, CDCl<sub>3</sub>)  $\delta$  170.4 (d,  $J = 22.0$  Hz), 143.3 (d,  $J = 5.3$  Hz), 137.7 (d,  $J = 5.6$  Hz), 135.6, 132.0 (d,  $J = 2.7$  Hz), 130.0, 129.9, 129.4 (q,  $J = 308.1$  Hz), 125.0, 124.6 (q,  $J = 1.9$  Hz), 123.4 (d,  $J = 2.5$  Hz), 123.0 (d,  $J = 18.6$  Hz), 118.0, 109.8, 92.2 (d,  $J = 200.4$  Hz), 62.4 (d,  $J = 26.7$  Hz), 56.6, 42.3, 22.6. IR (cm<sup>-1</sup>): 1712, 1619, 1471, 1375, 1160, 1111, 1080, 850, 752. HRMS (TOF MS ESI): calcd for C<sub>23</sub>H<sub>24</sub>F<sub>4</sub>N<sub>2</sub>O<sub>2</sub>S<sub>2</sub>Na<sup>+</sup> [M+Na]<sup>+</sup> 523.1108, found 523.1131.

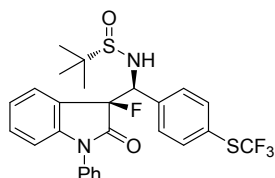

**(S)-N-((S)-((S)-3-fluoro-2-oxo-1-phenylindolin-3-yl)(4-((trifluoromethyl)thio)phenyl)methyl)-2-methylpropane-2-sulfinamide (13l)**

White solid, 241.6 mg (90% yield),  $R_f = 0.60$  (hexanes/ethyl acetate = 1:1), m.p. 86–87 °C,  $[\alpha]_{20}^D = +120.3$  (c = 0.36, CH<sub>2</sub>Cl<sub>2</sub>). <sup>1</sup>H NMR (400 MHz, CDCl<sub>3</sub>)  $\delta$  7.59 (d,  $J = 7.2$  Hz, 1H), 7.46 – 7.35 (m, 5H), 7.24 – 7.14 (m, 4H), 6.94 (d,  $J = 7.7$  Hz, 2H), 6.43 (d,  $J = 7.7$  Hz, 1H), 5.35 (dd,  $J = 6.5, 3.7$  Hz, 1H), 5.14 (dd,  $J = 3.6, 1.5$  Hz, 1H), 1.28 (s, 9H); <sup>19</sup>F NMR (376 MHz, CDCl<sub>3</sub>)  $\delta$  -42.62 (s, 3F), -162.91 (s, 1F); <sup>13</sup>C NMR (101 MHz, CDCl<sub>3</sub>)  $\delta$  169.8 (d,  $J = 22.0$  Hz), 143.9 (d,  $J = 5.1$  Hz), 137.7 (dd,  $J = 5.3, 0.7$  Hz), 135.6, 132.6, 131.9 (d,  $J = 2.4$  Hz), 129.9, 129.8, 129.4 (q,  $J = 308.1$  Hz), 128.7, 125.9, 125.1, 124.6, 123.8 (d,  $J = 2.3$  Hz), 122.8 (d,  $J = 18.6$  Hz), 109.8, 92.6 (d,  $J = 202.4$  Hz), 62.8 (d,  $J = 26.6$  Hz), 56.5, 22.6. IR (cm<sup>-1</sup>): 1735, 1614, 1499, 1467, 1374, 1113, 1083, 755, 700. HRMS (TOF MS ESI): calcd for C<sub>26</sub>H<sub>24</sub>F<sub>4</sub>N<sub>2</sub>O<sub>2</sub>S<sub>2</sub>Na<sup>+</sup> [M+Na]<sup>+</sup> 559.1108, found 559.1114.

### 3.2. Characterization data of compounds 14

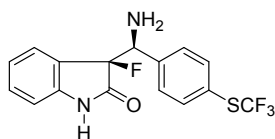

#### (S)-3-((S)-amino(4-((trifluoromethyl)thio)phenyl)methyl)-3-fluoroindolin-2-one (14)

Colorless oil, 63.5 mg (89% yield),  $R_f = 0.31$  (hexanes/ethyl acetate = 1:1),  $[\alpha]_{20}^D = +33.6$  ( $c = 0.93$ ,  $\text{CH}_2\text{Cl}_2$ ).  $^1\text{H}$  NMR (400 MHz,  $\text{CDCl}_3$ )  $\delta$  9.13 (s, 1H), 7.59 (d,  $J = 8.2$  Hz, 2H), 7.32 (d,  $J = 8.0$  Hz, 2H), 7.29 – 7.23 (m, 1H), 6.95 (t,  $J = 7.6$  Hz, 1H), 6.79 (d,  $J = 7.8$  Hz, 1H), 6.69 (d,  $J = 7.5$  Hz, 1H), 4.74 (d,  $J = 8.4$  Hz, 1H), 1.98 (br, 2H);  $^{19}\text{F}$  NMR (376 MHz,  $\text{CDCl}_3$ )  $\delta$  -42.65 (s, 3F), -158.41 (s, 1F);  $^{13}\text{C}$  NMR (101 MHz,  $\text{CDCl}_3$ )  $\delta$  174.9 (d,  $J = 20.8$  Hz), 142.4 (d,  $J = 5.7$  Hz), 140.8, 135.9, 131.8 (d,  $J = 2.8$  Hz), 129.6 (q,  $J = 308.1$  Hz), 129.2 (d,  $J = 1.7$  Hz), 126.1, 124.3 (q,  $J = 2.0$  Hz), 123.2 (d,  $J = 19.1$  Hz), 123.0 (d,  $J = 2.4$  Hz), 110.9, 94.0 (d,  $J = 194.9$  Hz), 58.4 (d,  $J = 28.9$  Hz). IR ( $\text{cm}^{-1}$ ): 1722, 1620, 1472, 1114, 1087, 757. HRMS (TOF MS ESI): calcd for  $\text{C}_{16}\text{H}_{13}\text{F}_4\text{N}_2\text{O}_S^+$   $[\text{M}+\text{H}]^+$  357.0679, found 357.0683. The ee values were determined by chiral stationary phase HPLC analysis using a Daicel Chiralpak AD-H column (90:10 hexanes/*i*-PrOH at 1.0 mL/min,  $\lambda = 254$  nm).

### 4. X-ray crystallography for 11bi

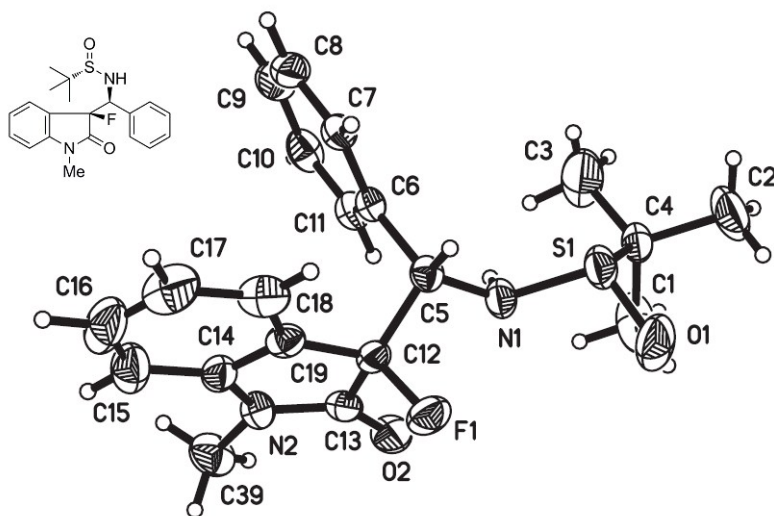

Figure 1 ORTEP structure of compound 11bi (CCDC number 1457060)



## 5. NMR spectra

### 5.1. NMR spectra of products 11 and 13

<sup>1</sup>H NMR spectrum of 11aa

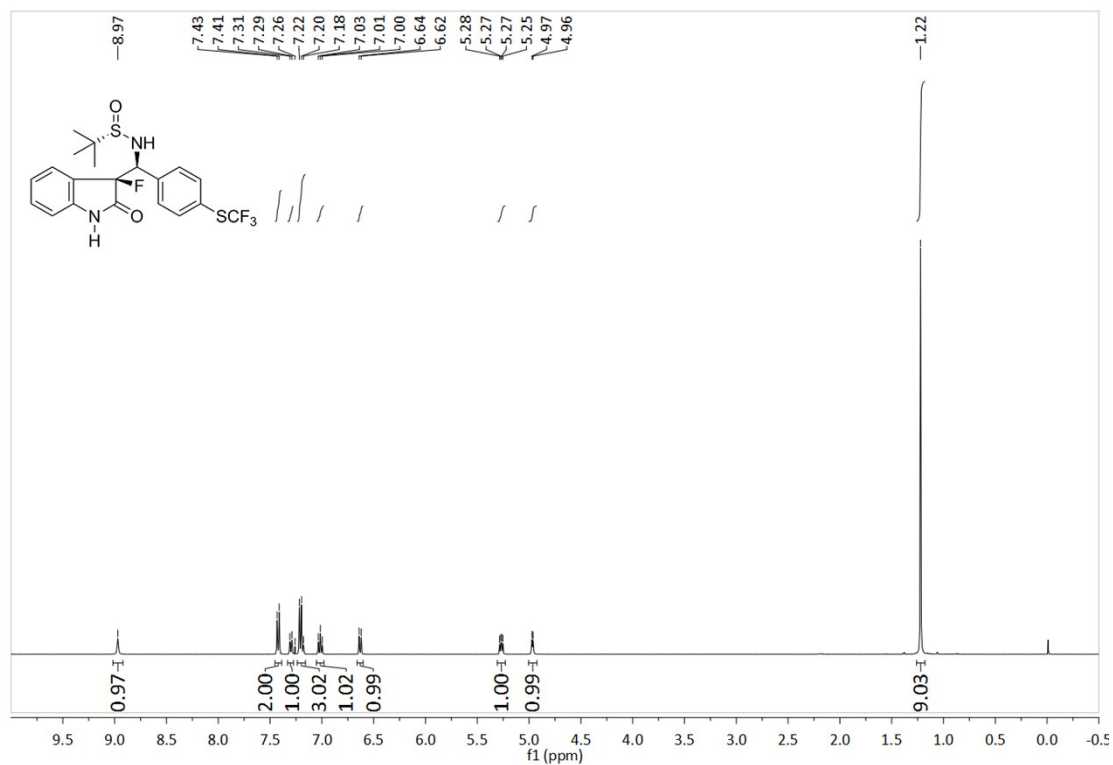

<sup>13</sup>C NMR spectrum of 11aa

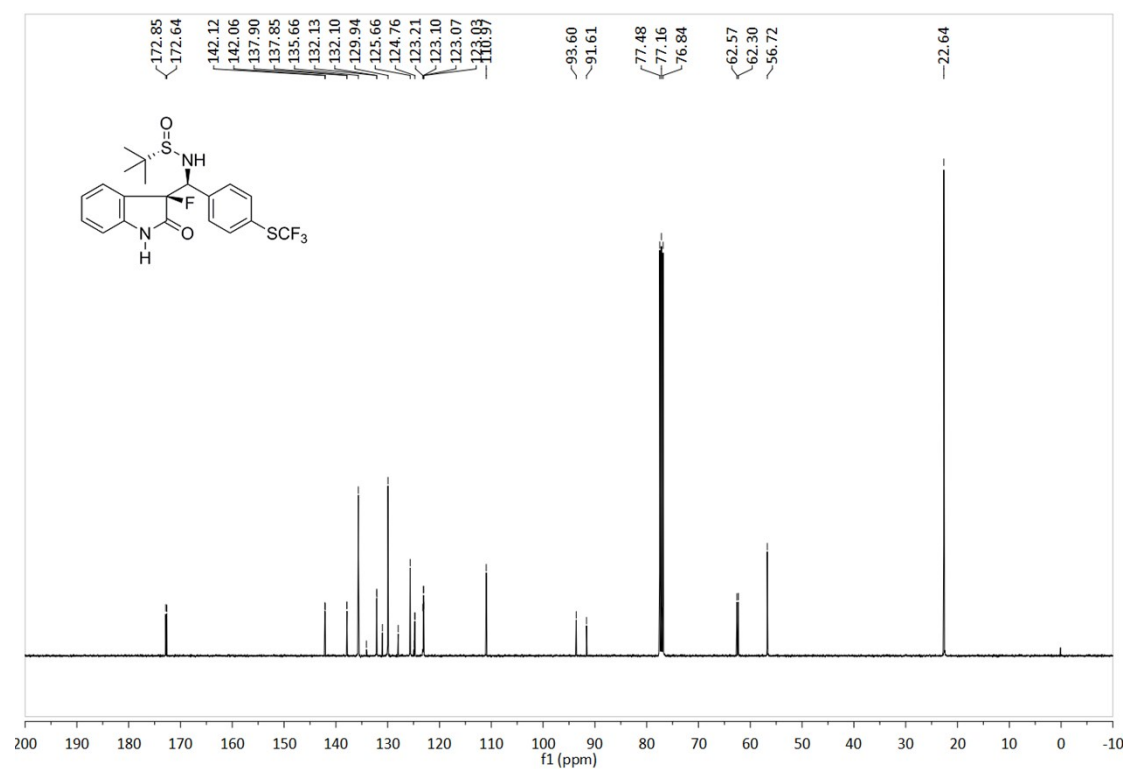

<sup>19</sup>F NMR spectrum of **11aa**

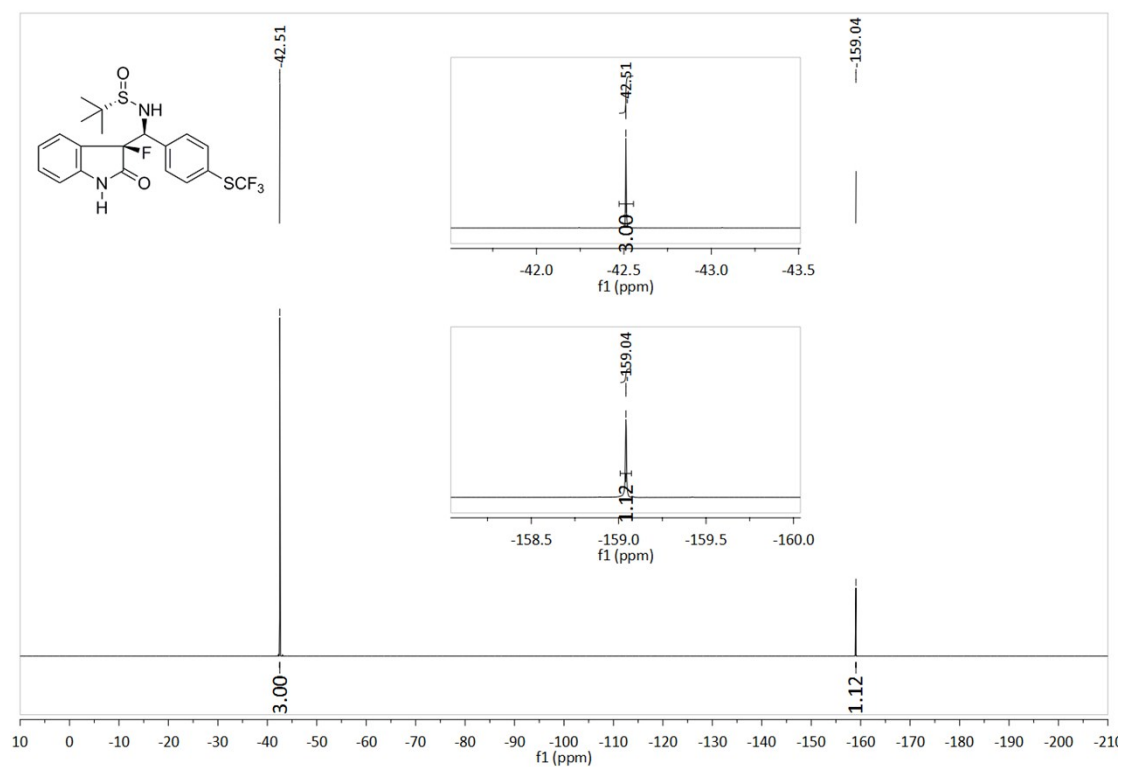

<sup>19</sup>F NMR spectrum of the crude reaction mixture

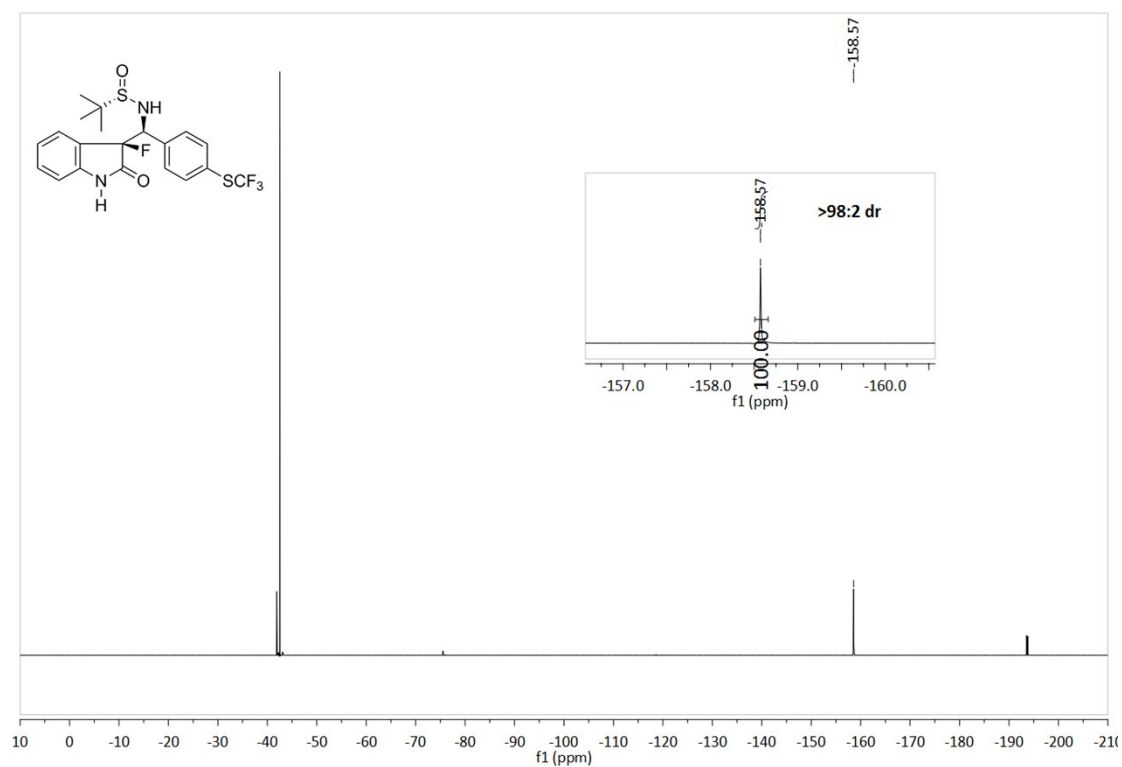

### <sup>1</sup>H NMR spectrum of **11ab**

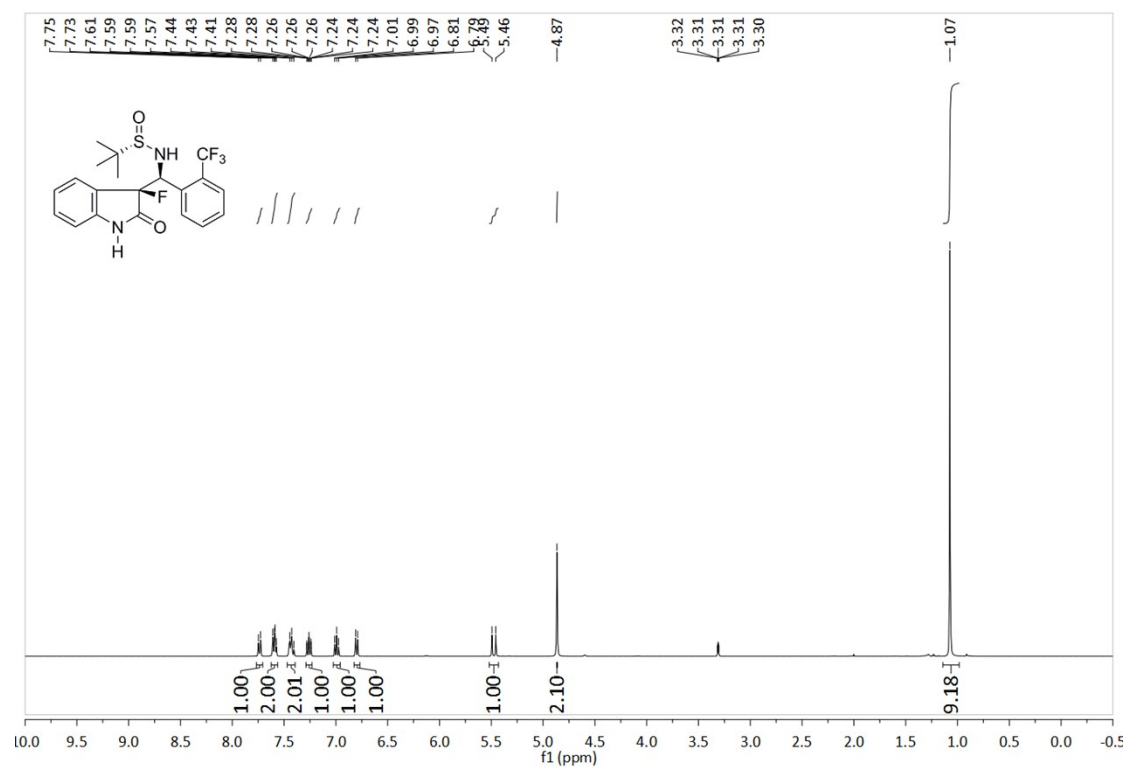

### <sup>13</sup>C NMR spectrum of **11ab**

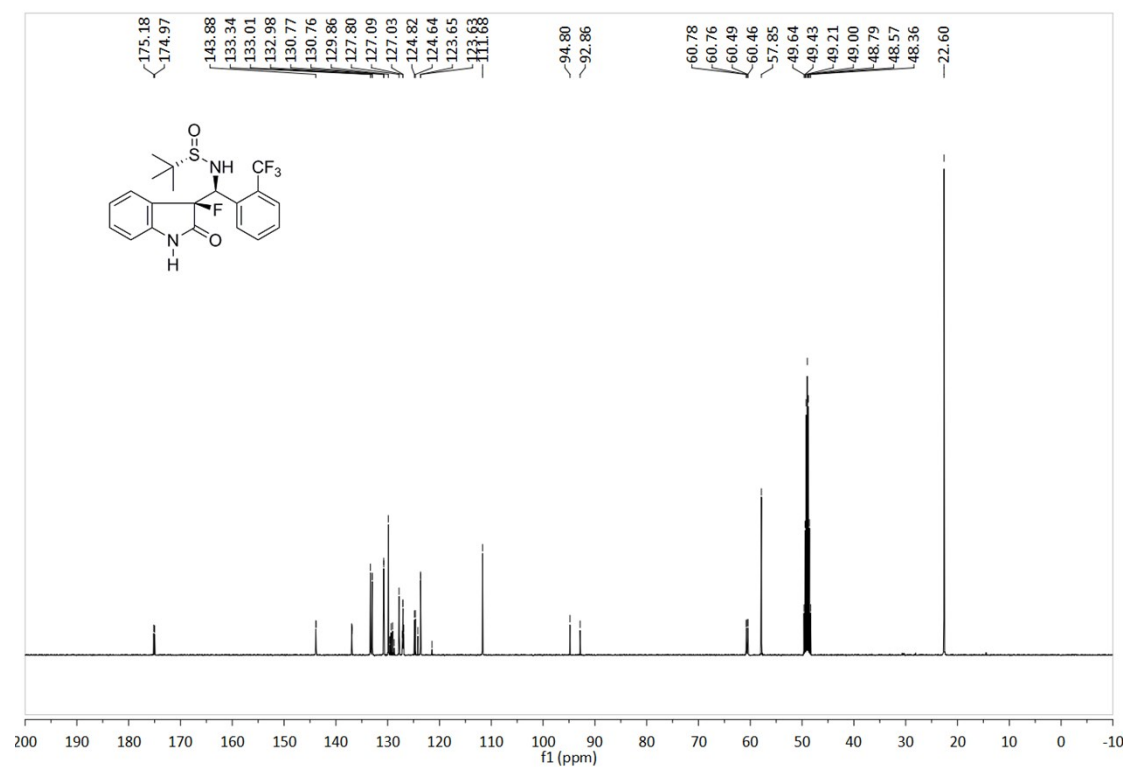

<sup>19</sup>F NMR spectrum of **11ab**

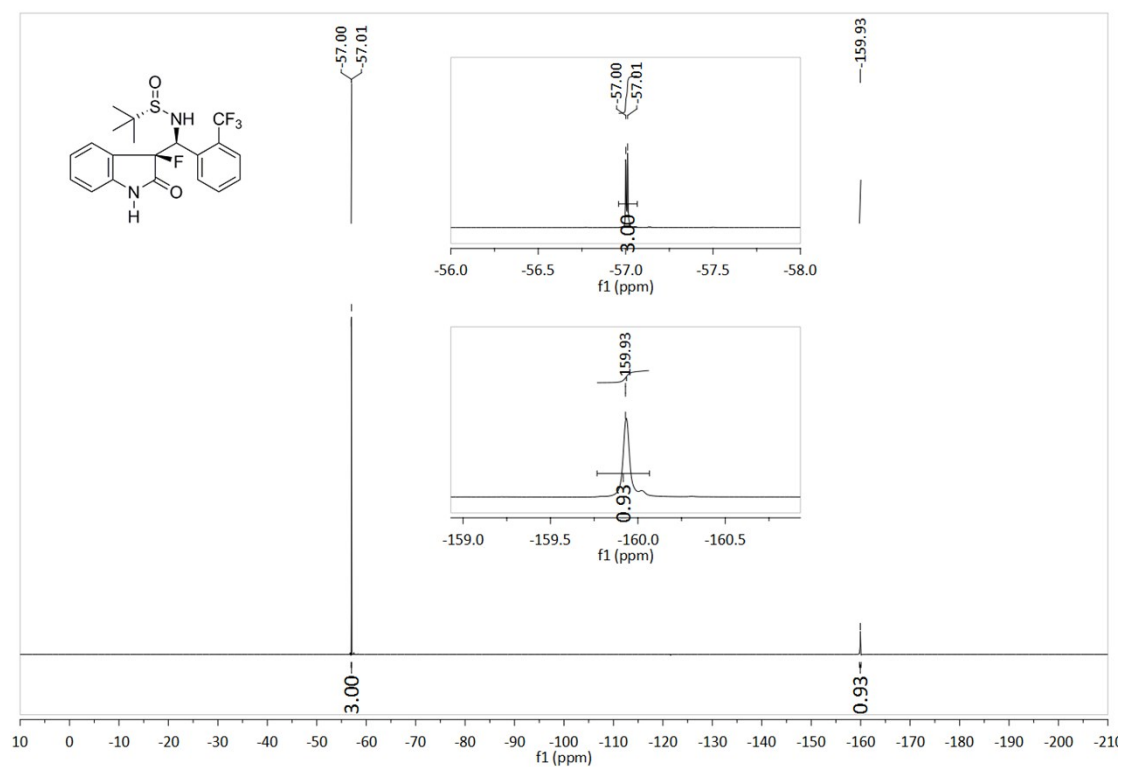

<sup>19</sup>F NMR spectrum of the crude reaction mixture

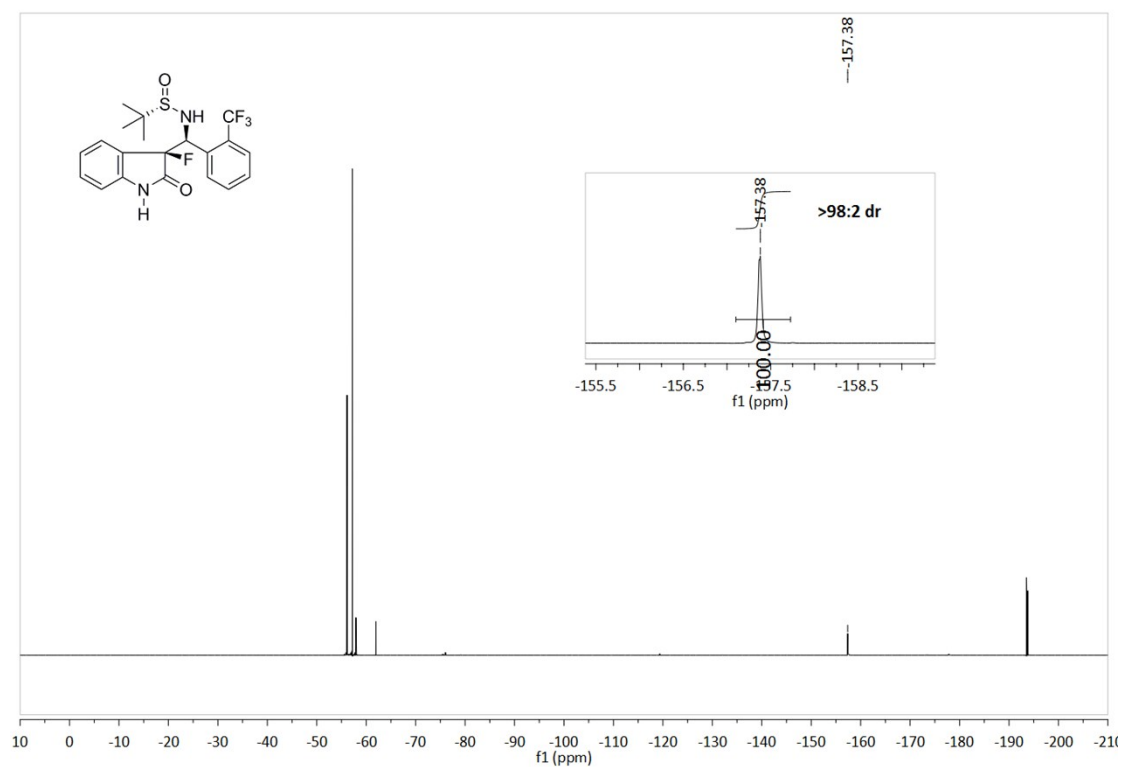

<sup>1</sup>H NMR spectrum of **11ac**

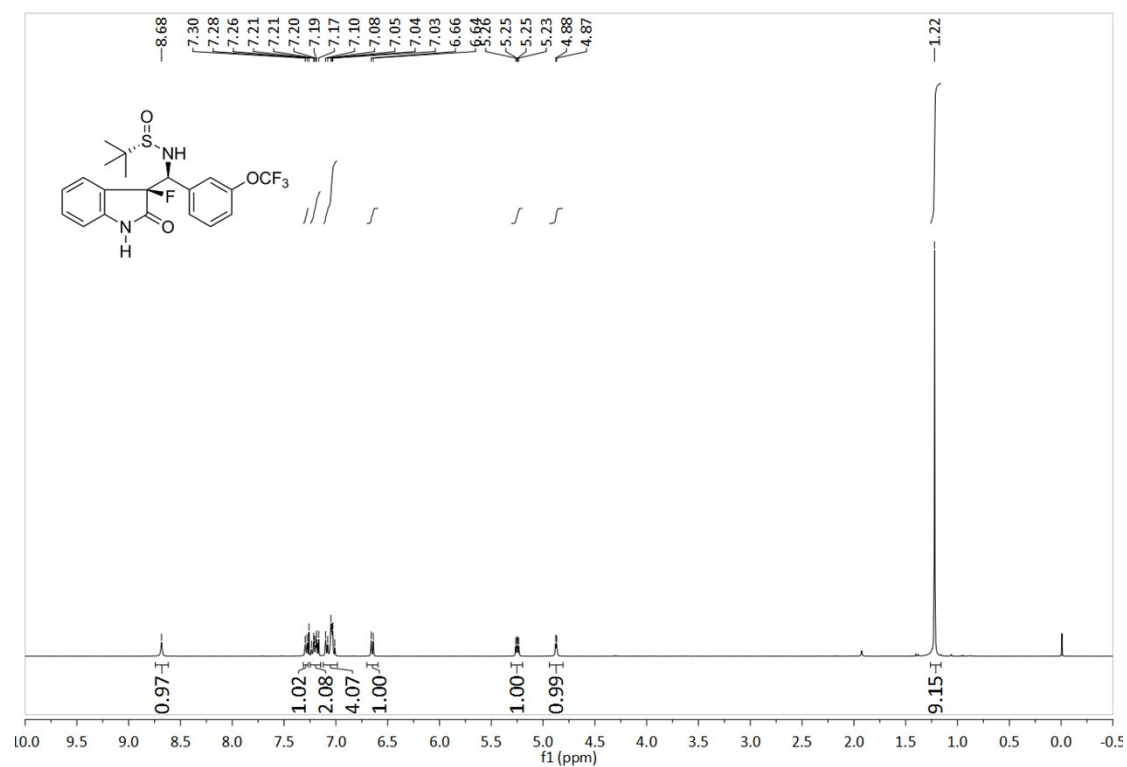

<sup>13</sup>C NMR spectrum of **11ac**

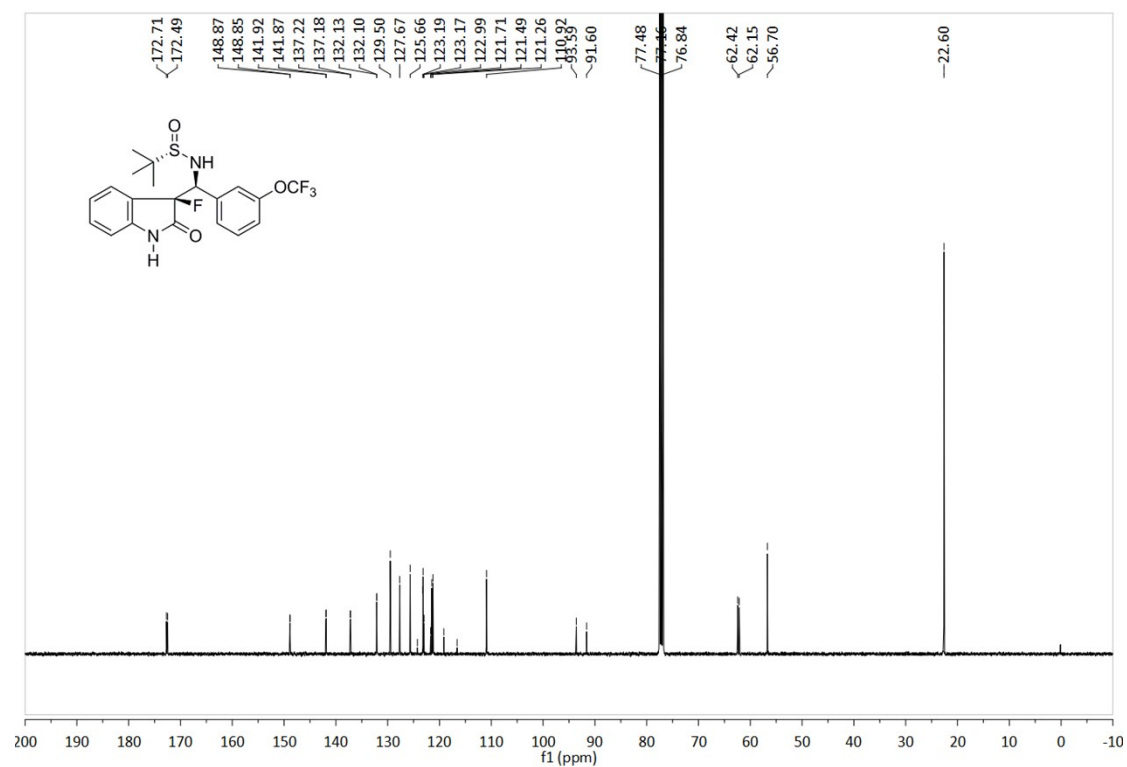

$^{19}\text{F}$  NMR spectrum of **11ac**

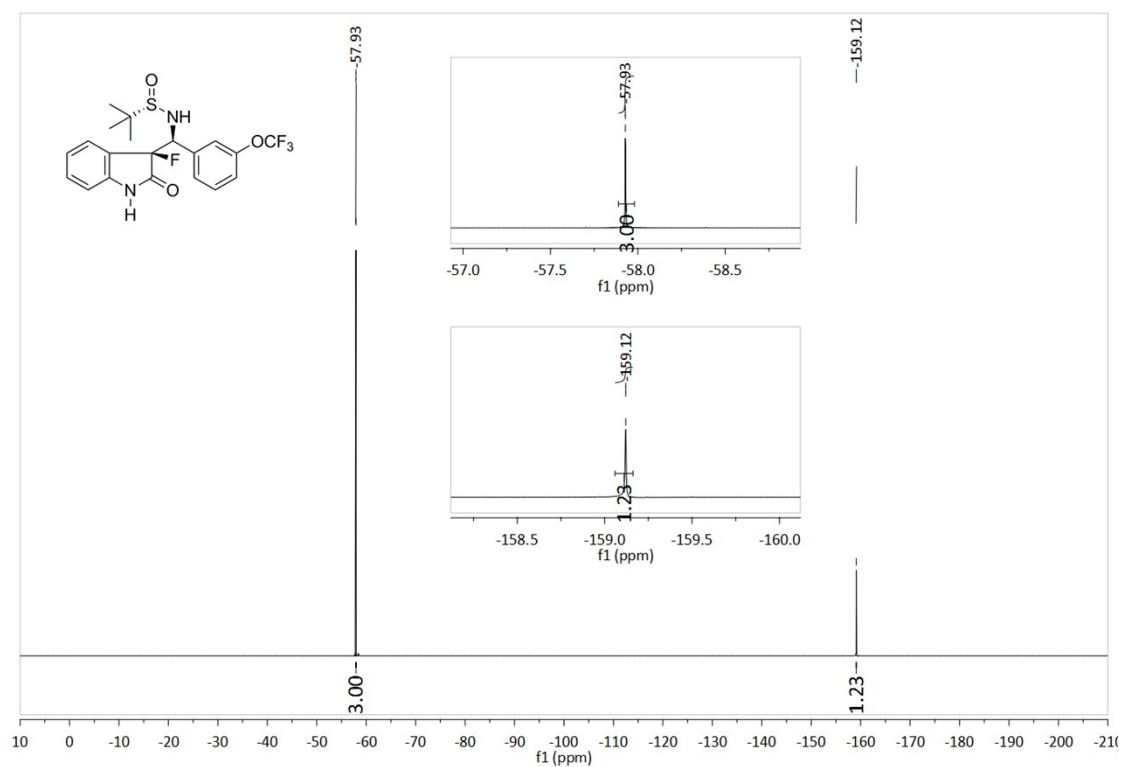

$^{19}\text{F}$  NMR spectrum of the crude reaction mixture

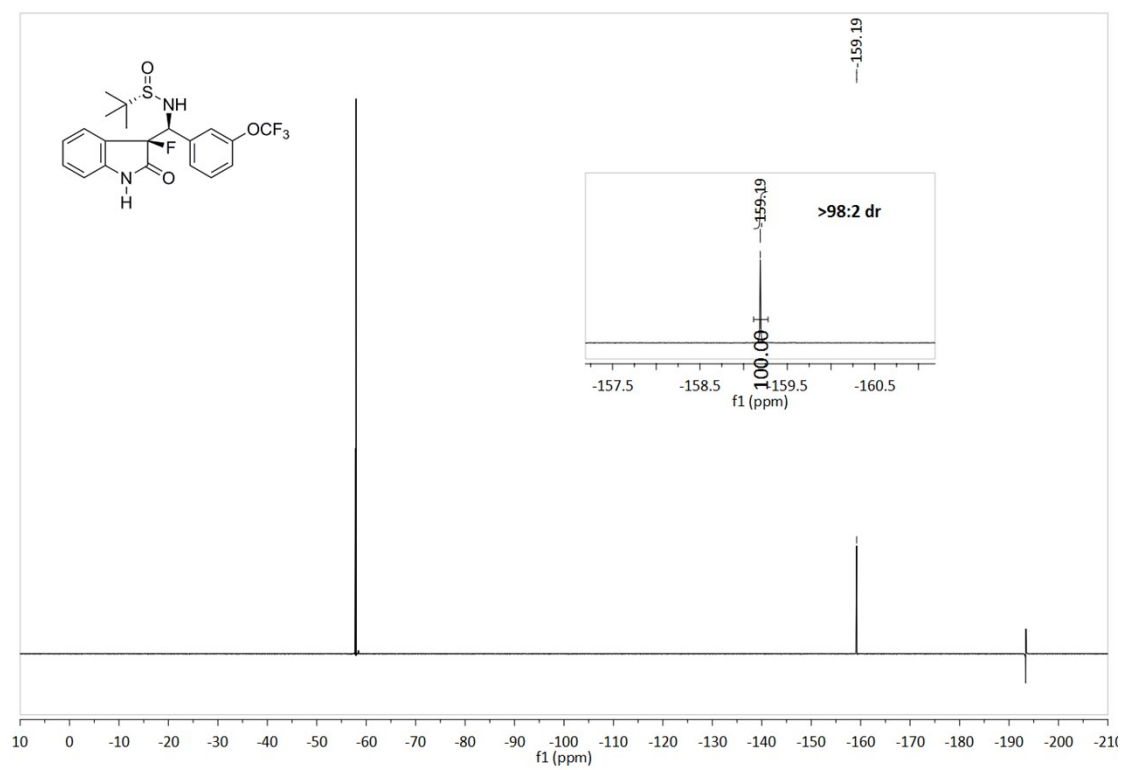

### <sup>1</sup>H NMR spectrum of **11ad**

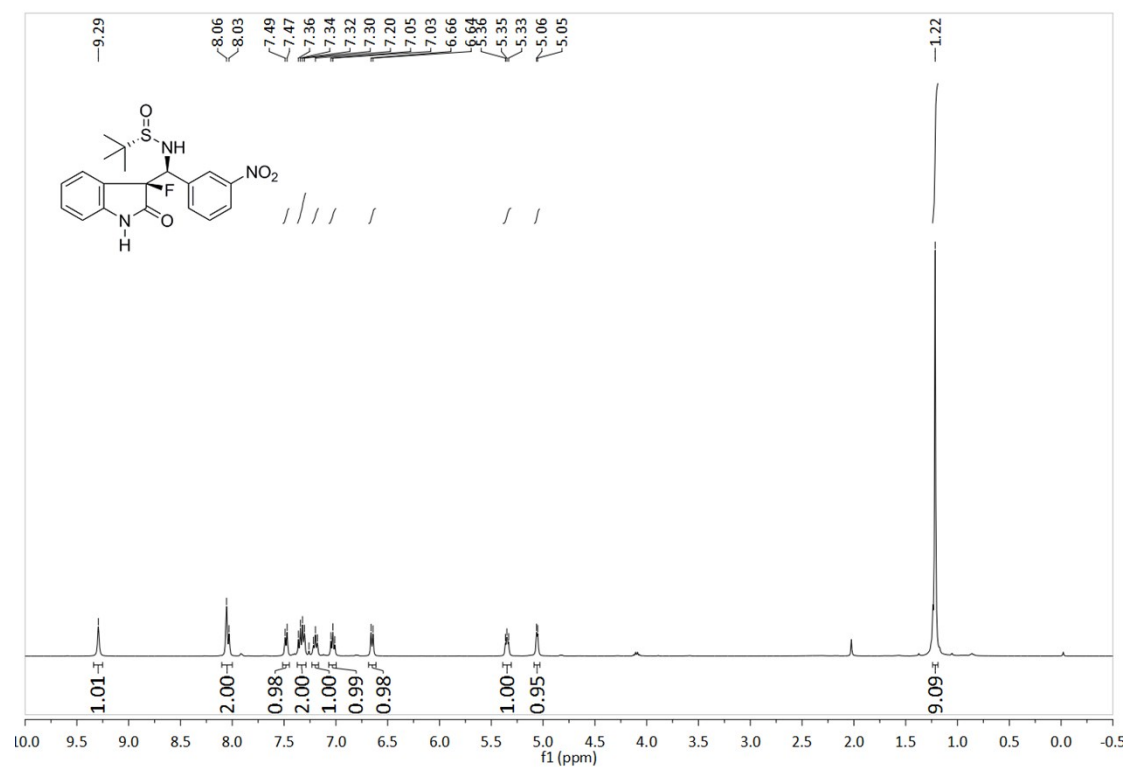

### <sup>13</sup>C NMR spectrum of **11ad**

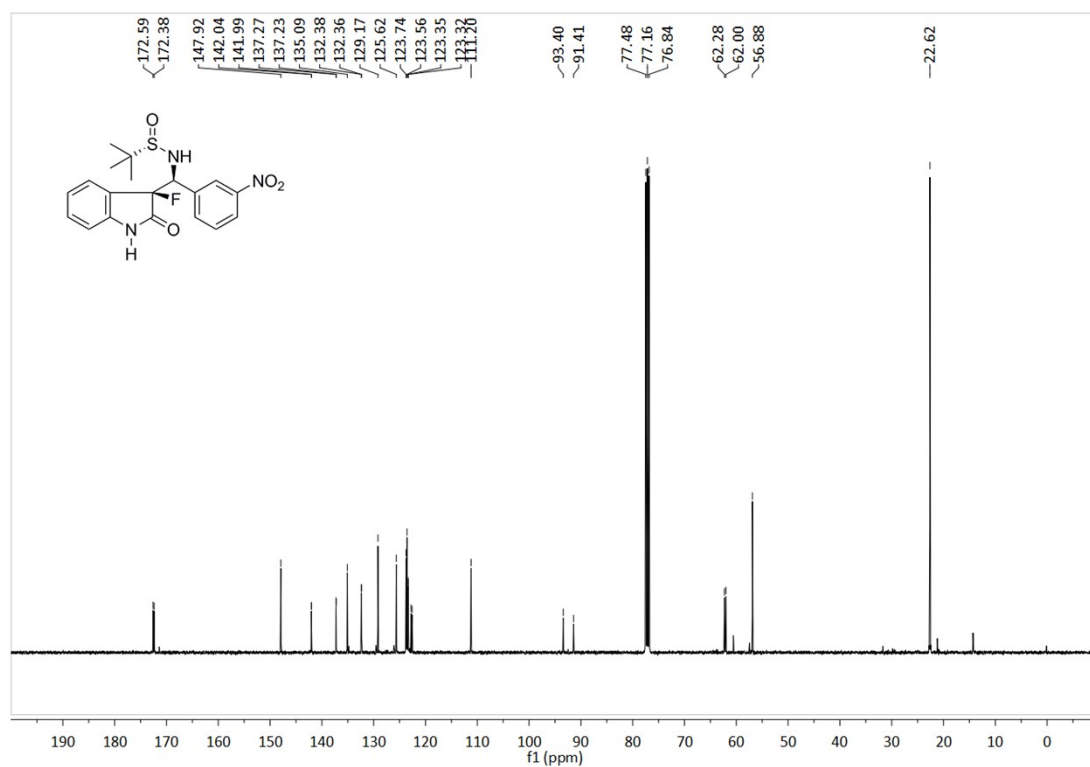

<sup>19</sup>F NMR spectrum of **11ad**

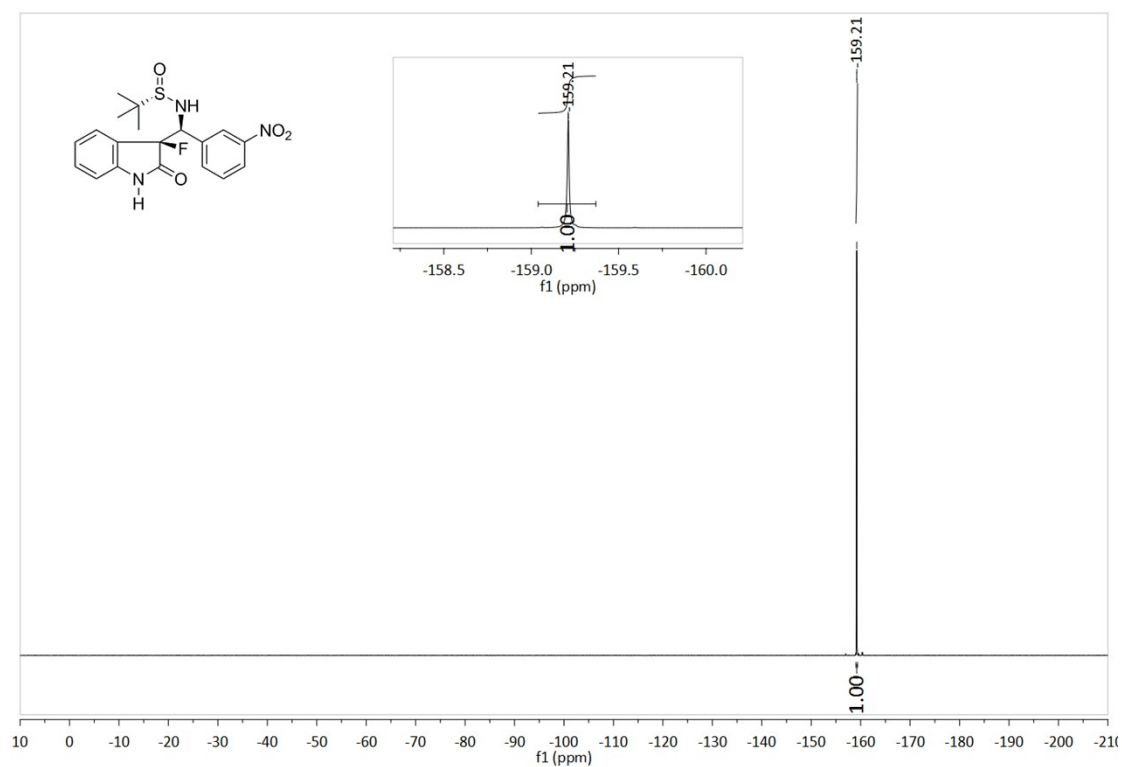

<sup>19</sup>F NMR spectrum of the crude reaction mixture

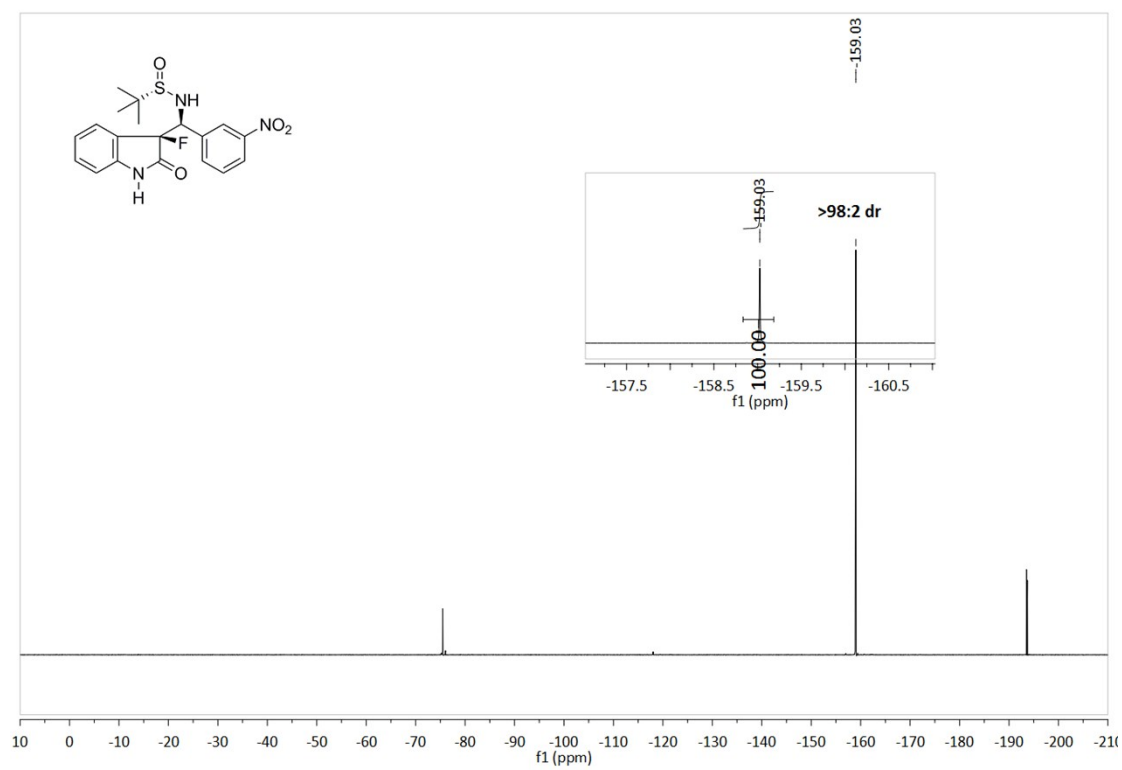



<sup>1</sup>H NMR spectrum of **11ae**

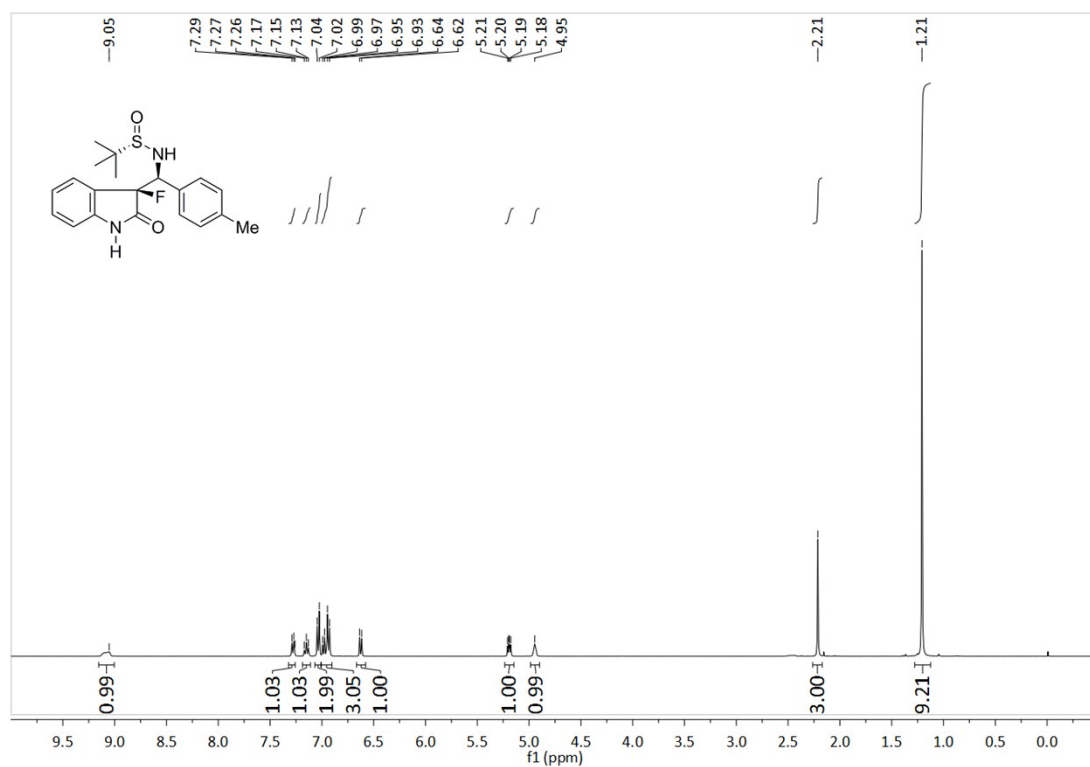

<sup>13</sup>C NMR spectrum of **11ae**

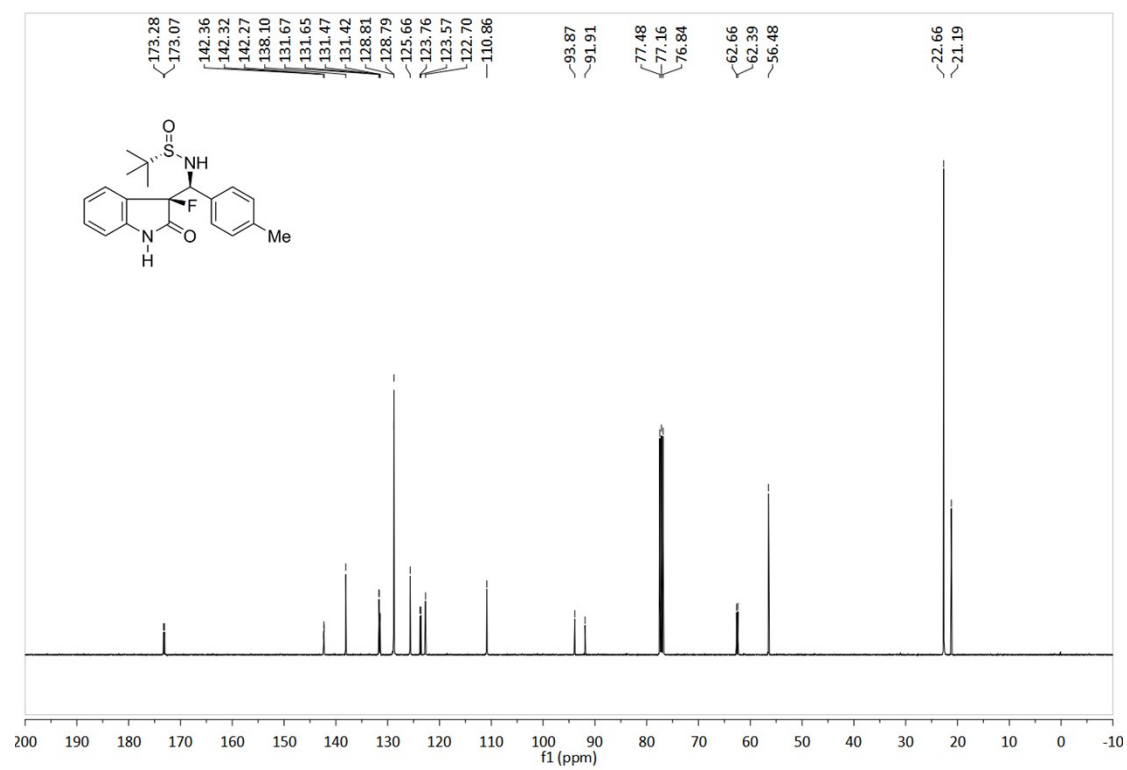

$^{19}\text{F}$  NMR spectrum of **11ae**

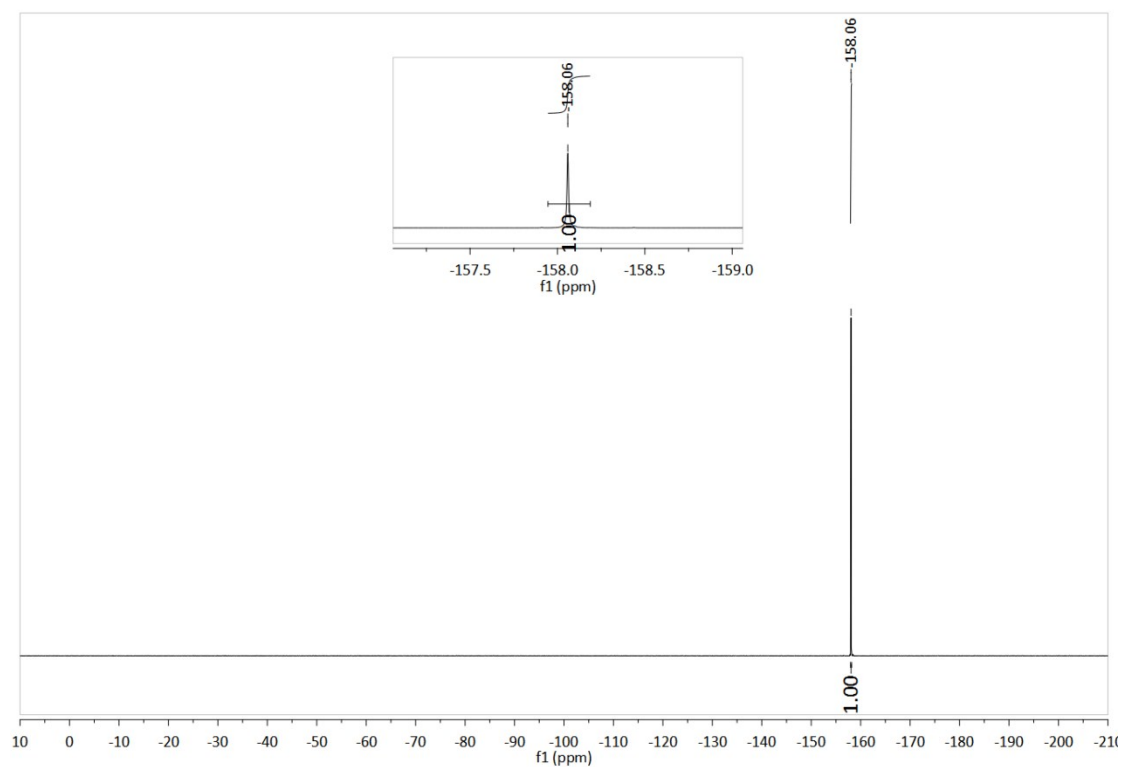

$^{19}\text{F}$  NMR spectrum of the crude reaction mixture

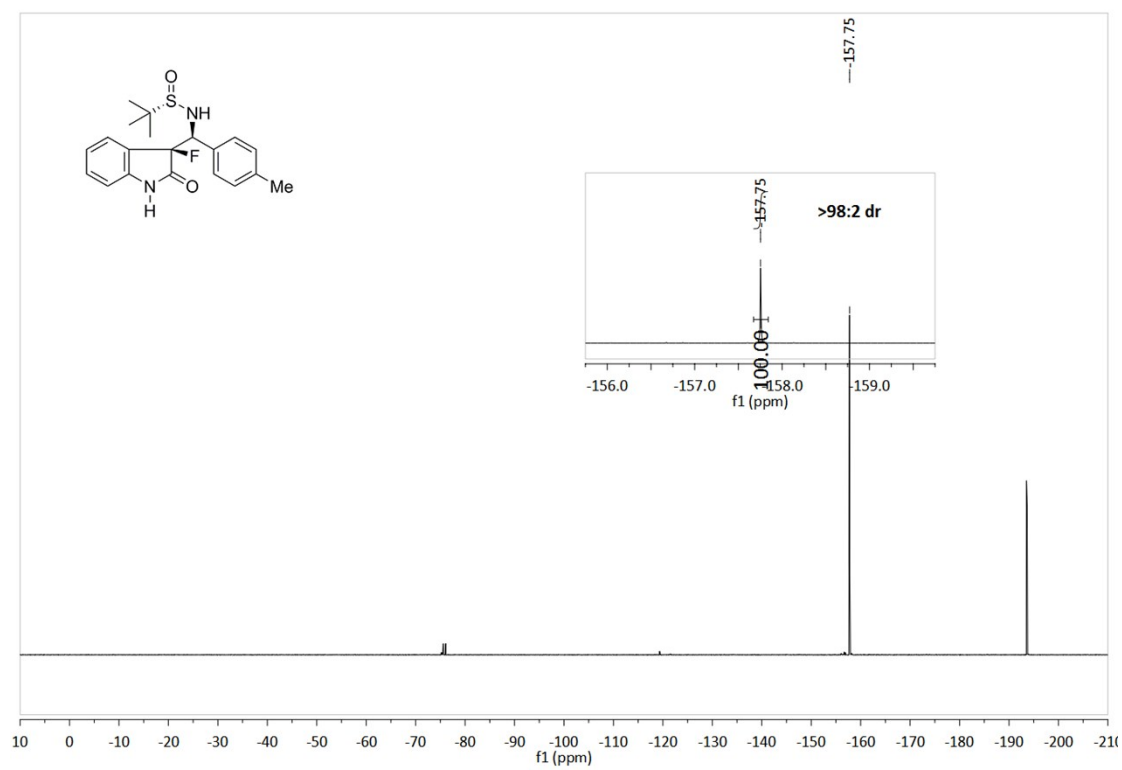

<sup>1</sup>H NMR spectrum of **11af**

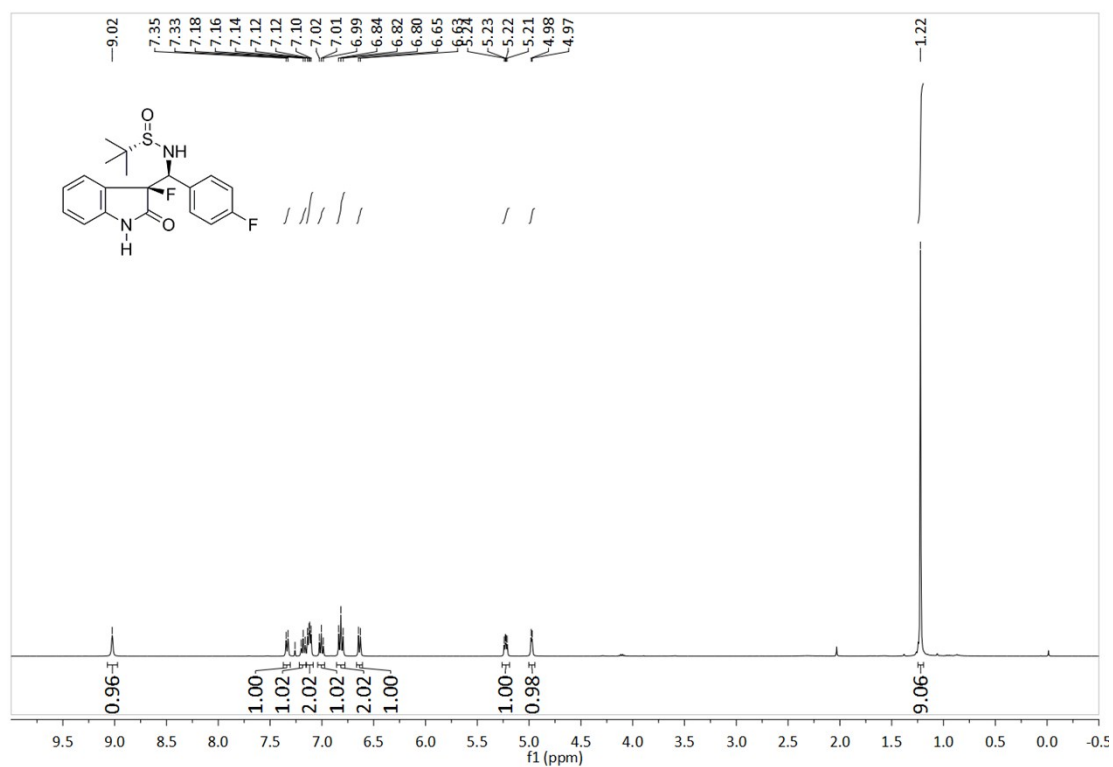

<sup>13</sup>C NMR spectrum of **11af**

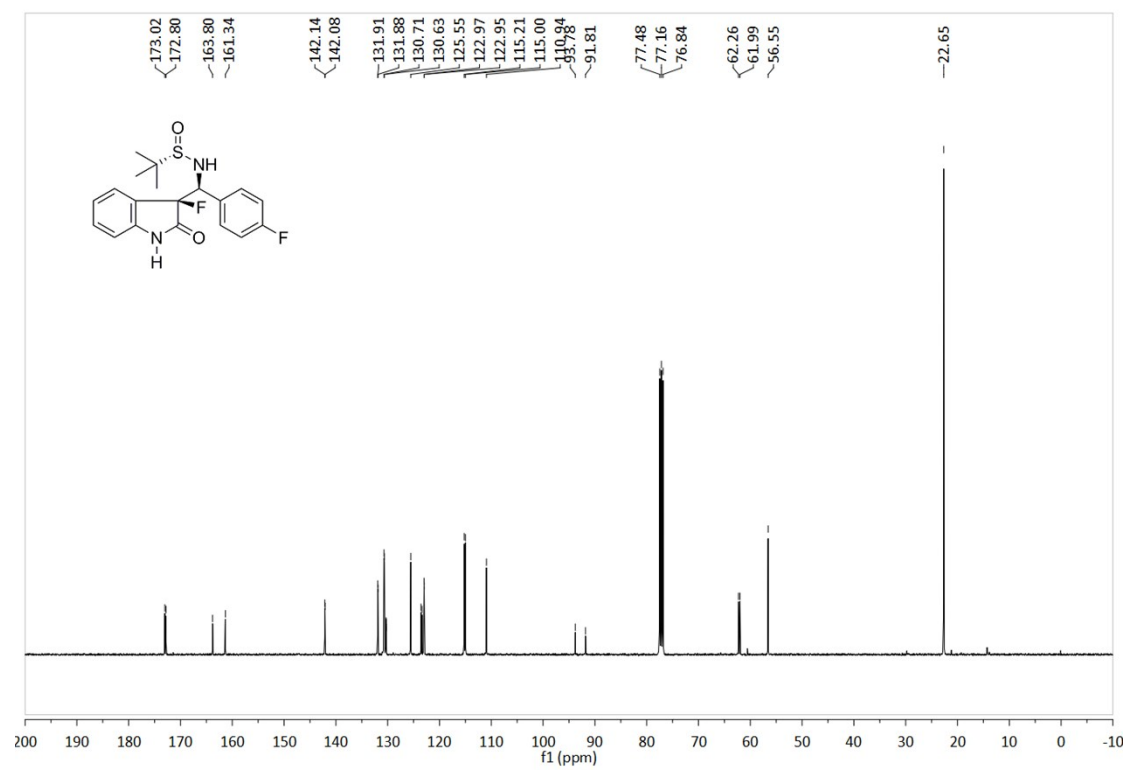

<sup>19</sup>F NMR spectrum of **11af**

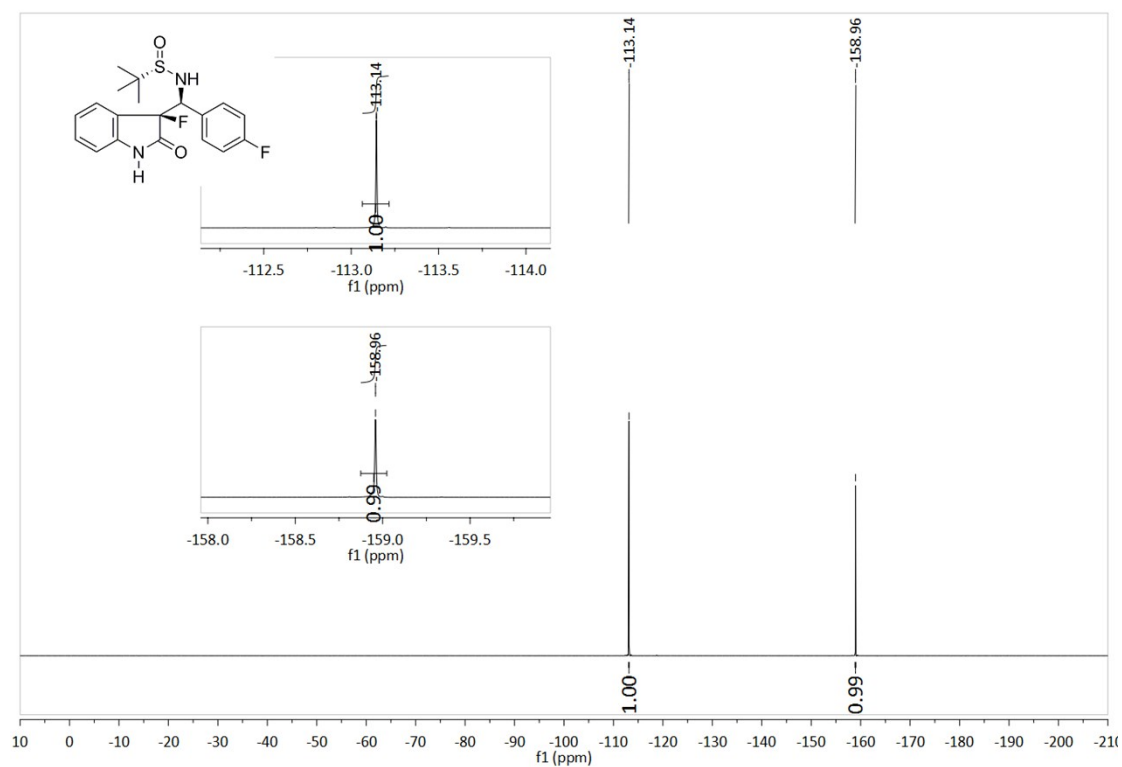

<sup>19</sup>F NMR spectrum of the crude reaction mixture

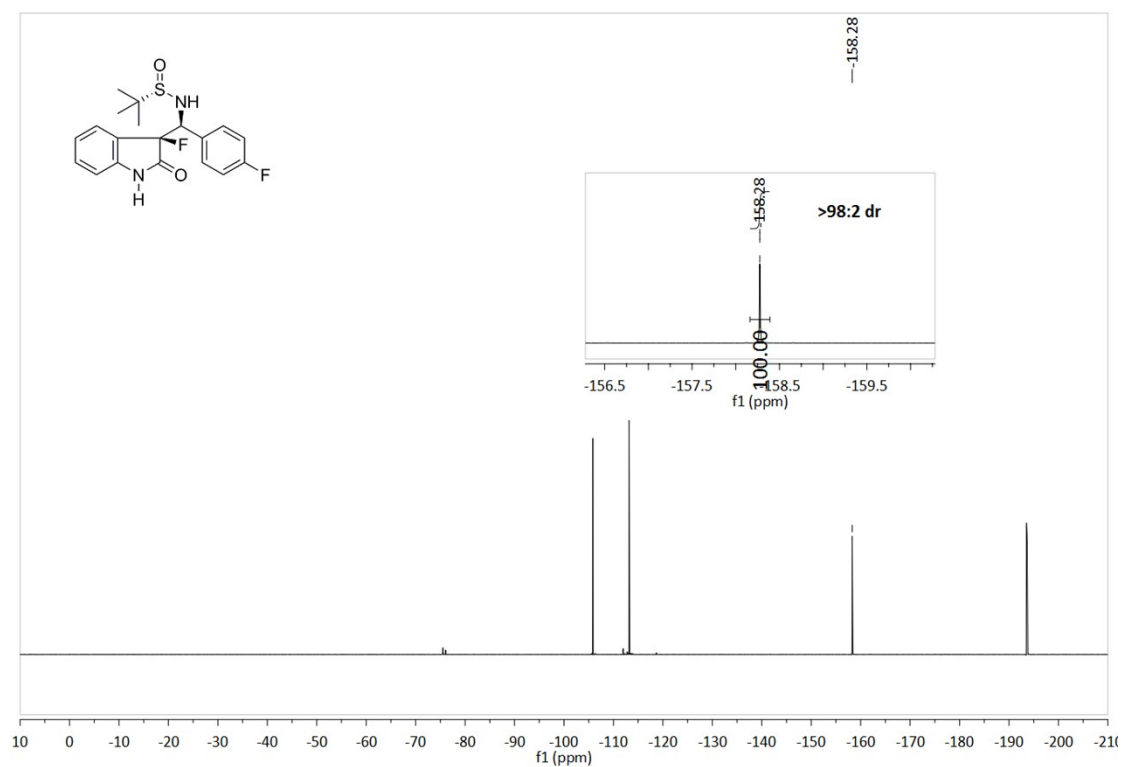

<sup>1</sup>H NMR spectrum of **11ag**

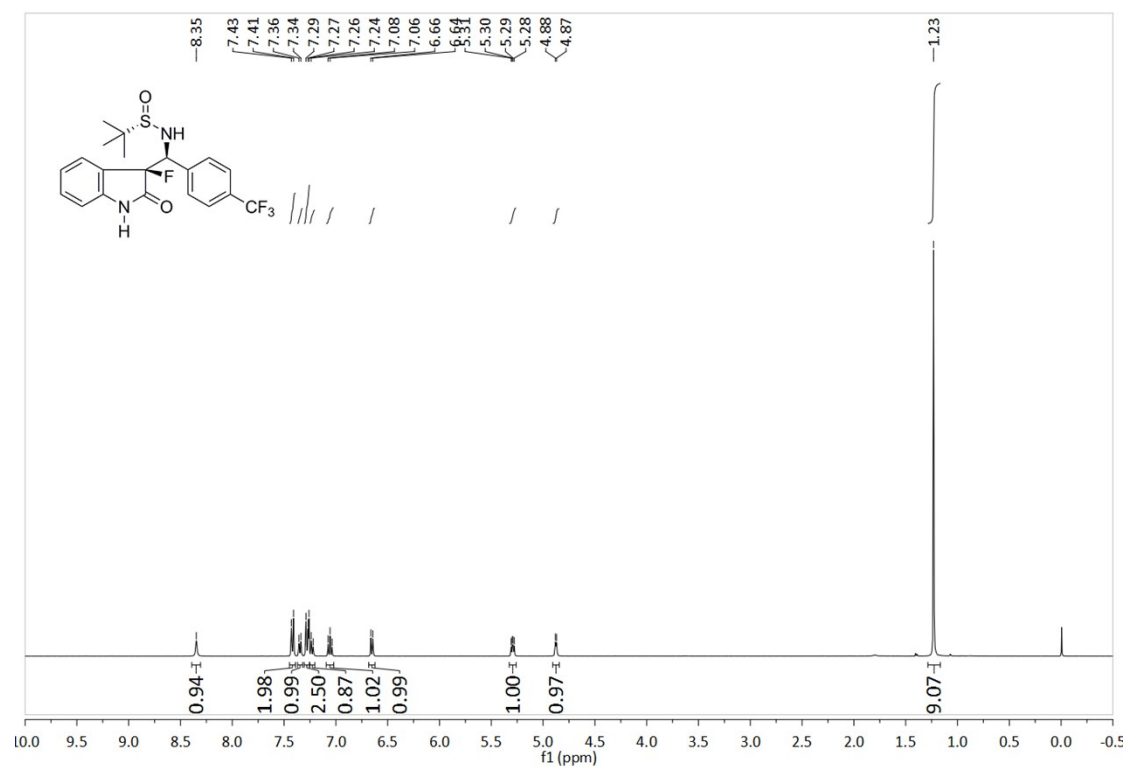

<sup>13</sup>C NMR spectrum of **11ag**

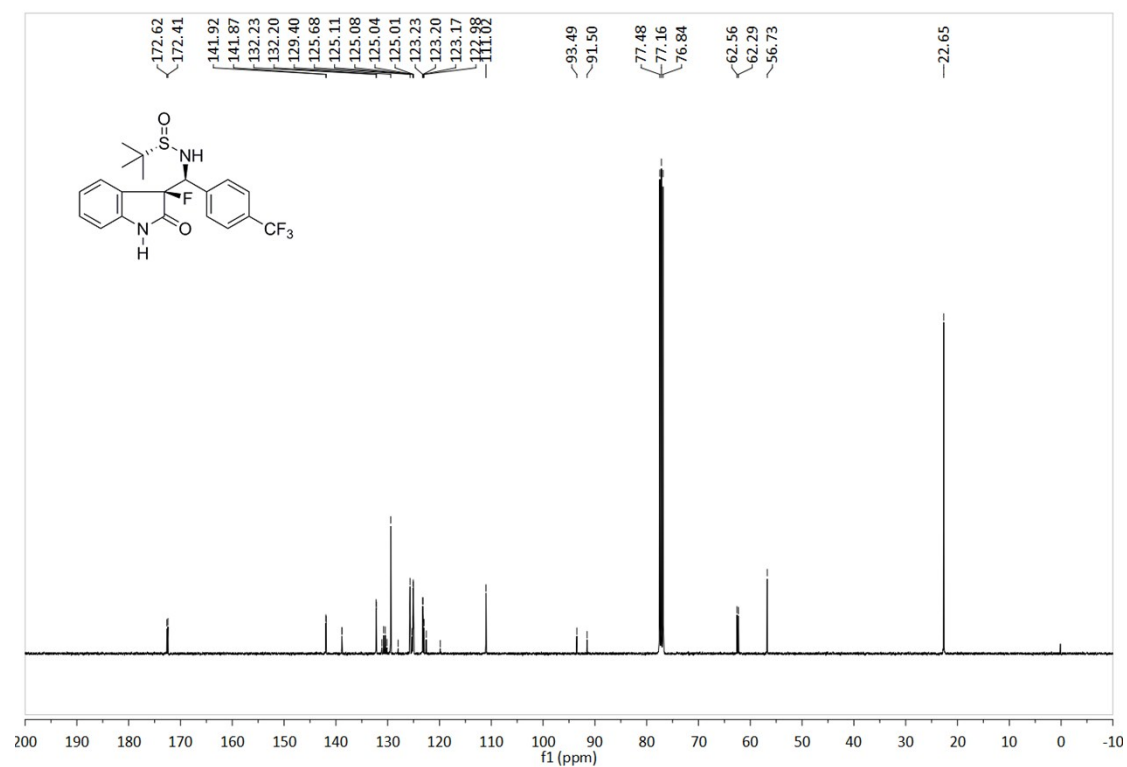

<sup>19</sup>F NMR spectrum of **11ag**

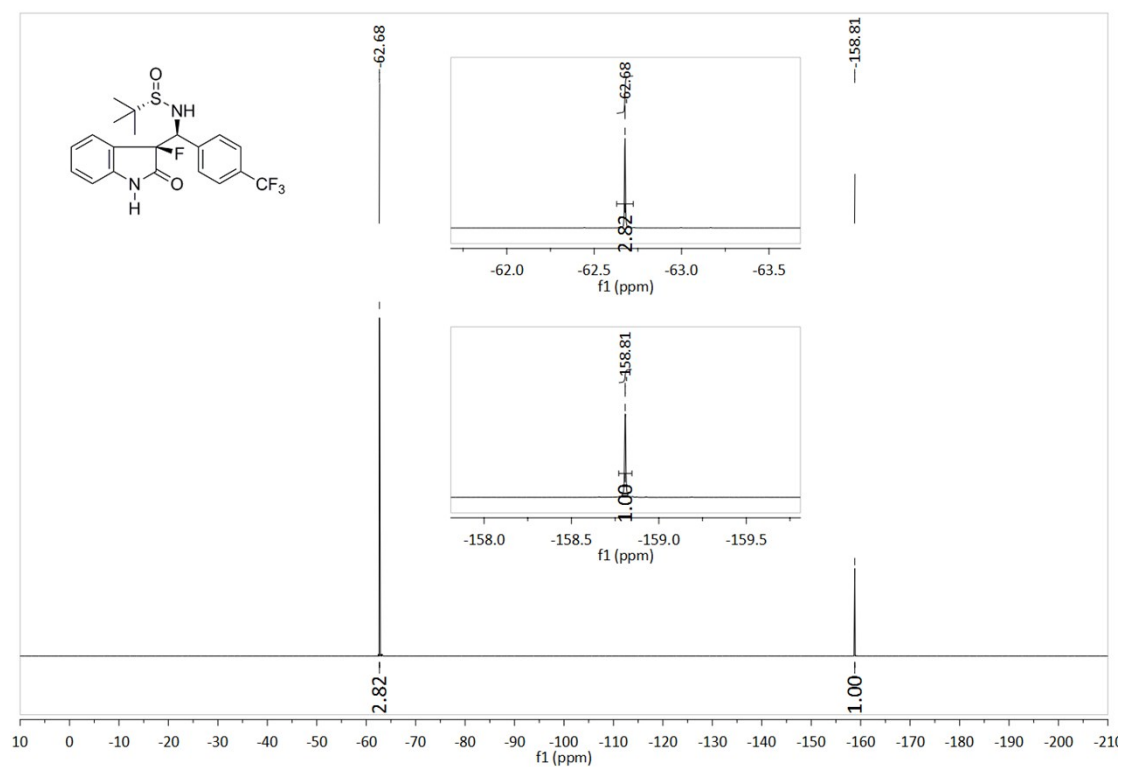

<sup>19</sup>F NMR spectrum of the crude reaction mixture

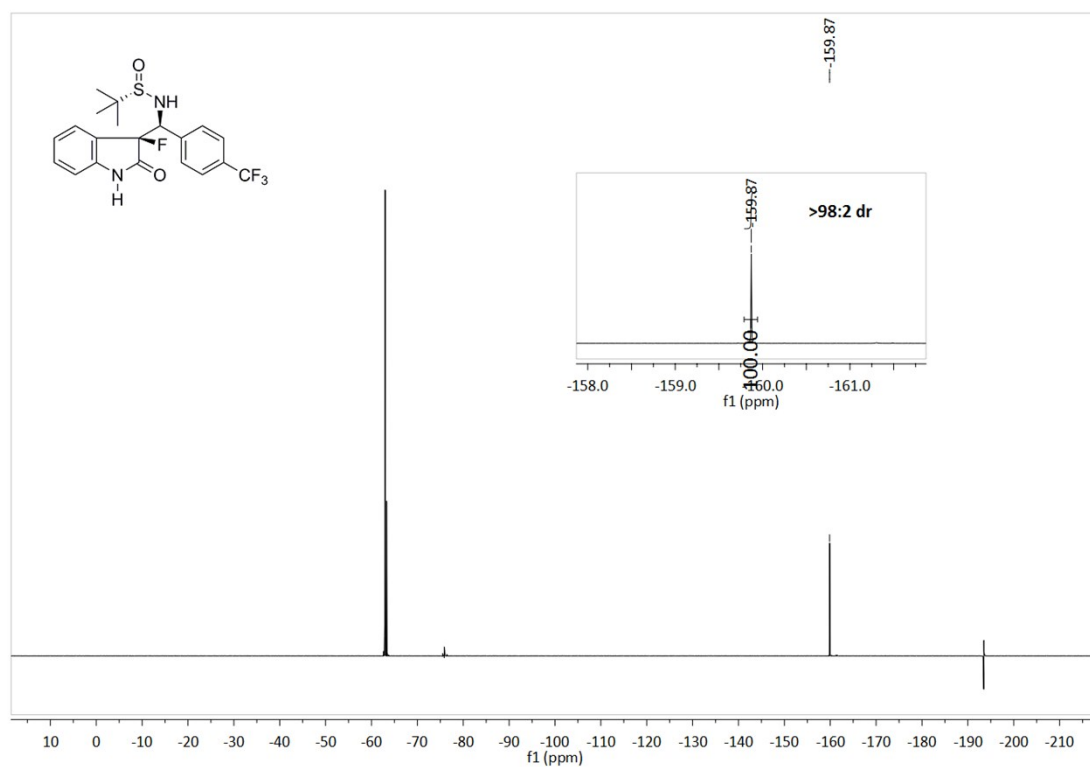

### <sup>1</sup>H NMR spectrum of **11ah**

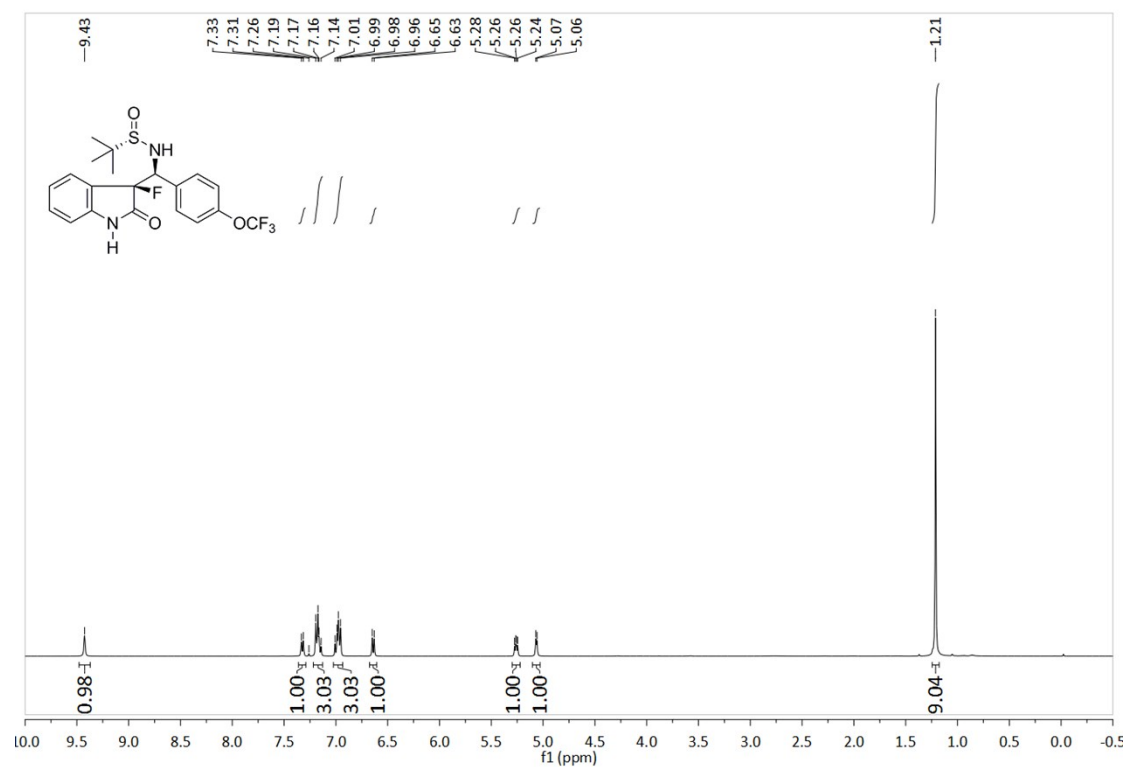

### <sup>13</sup>C NMR spectrum of **11ah**

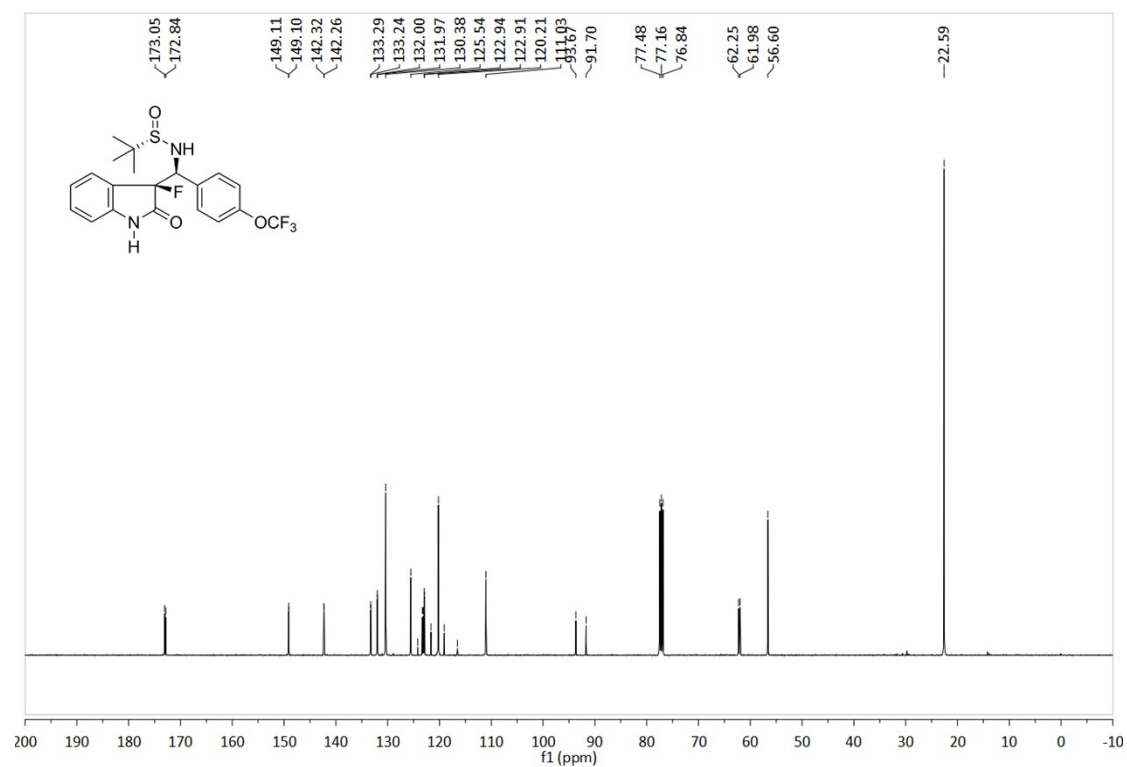

$^{19}\text{F}$  NMR spectrum of **11ah**

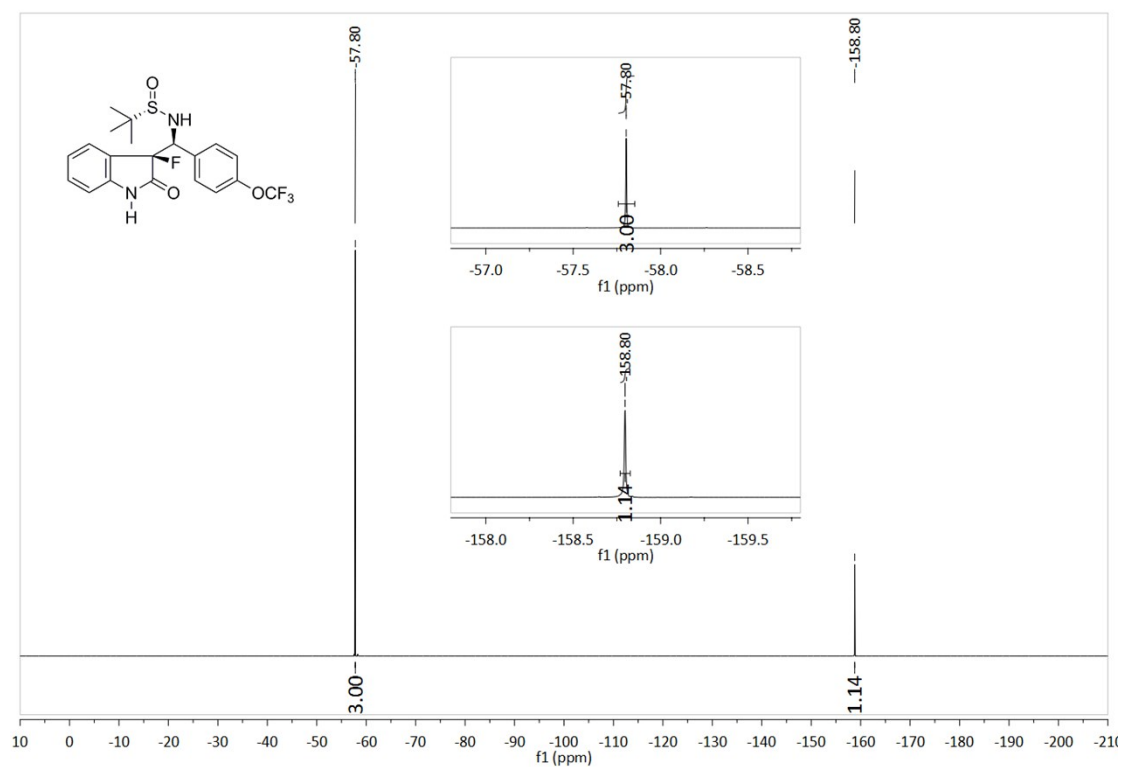

$^{19}\text{F}$  NMR spectrum of the crude reaction mixture

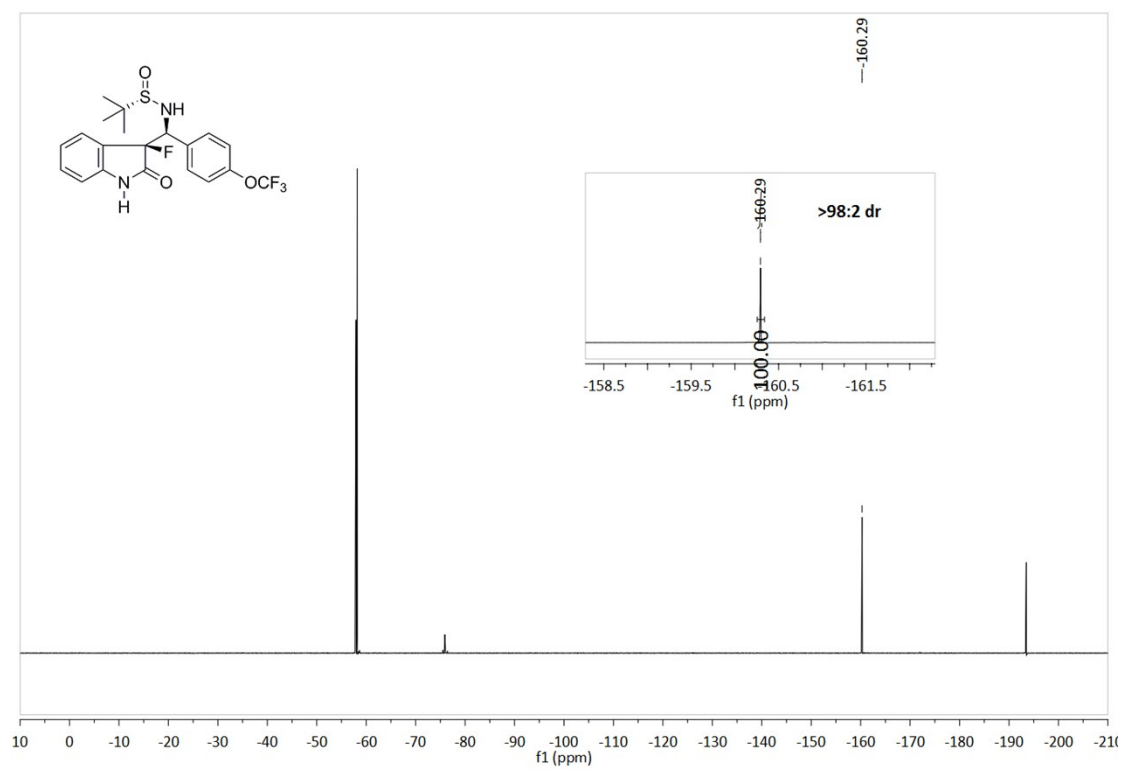



<sup>1</sup>H NMR spectrum of **11ai**

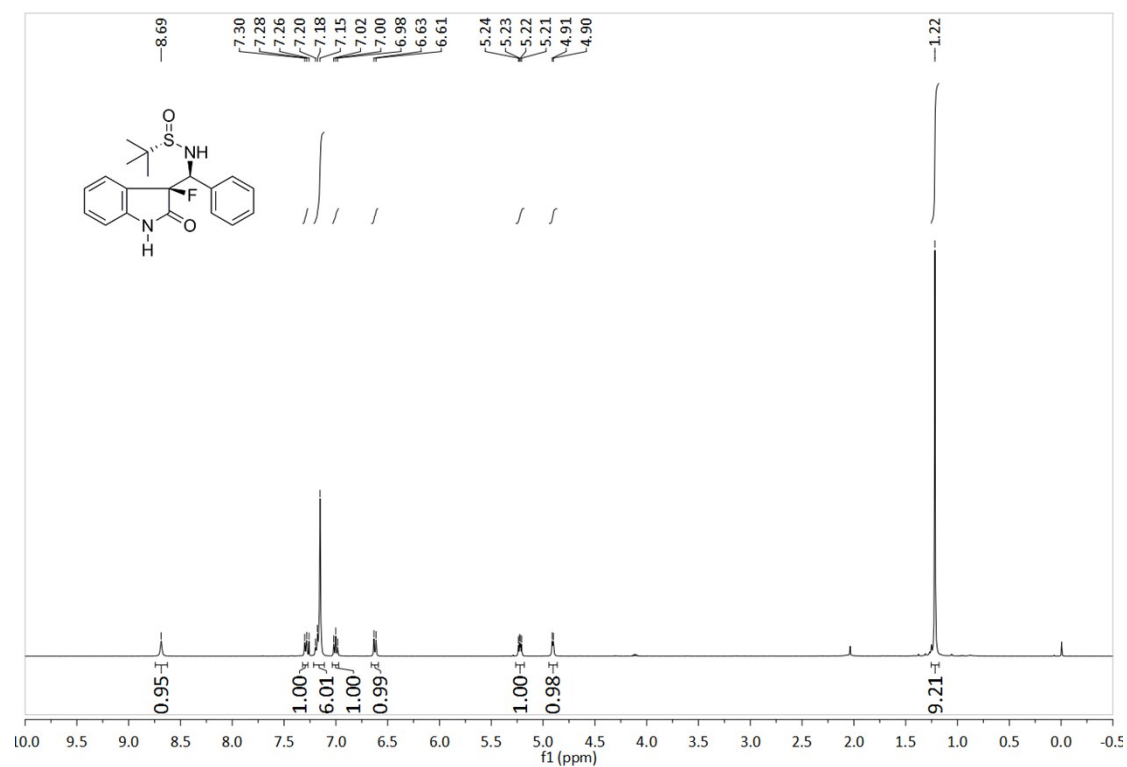

<sup>13</sup>C NMR spectrum of **11ai**

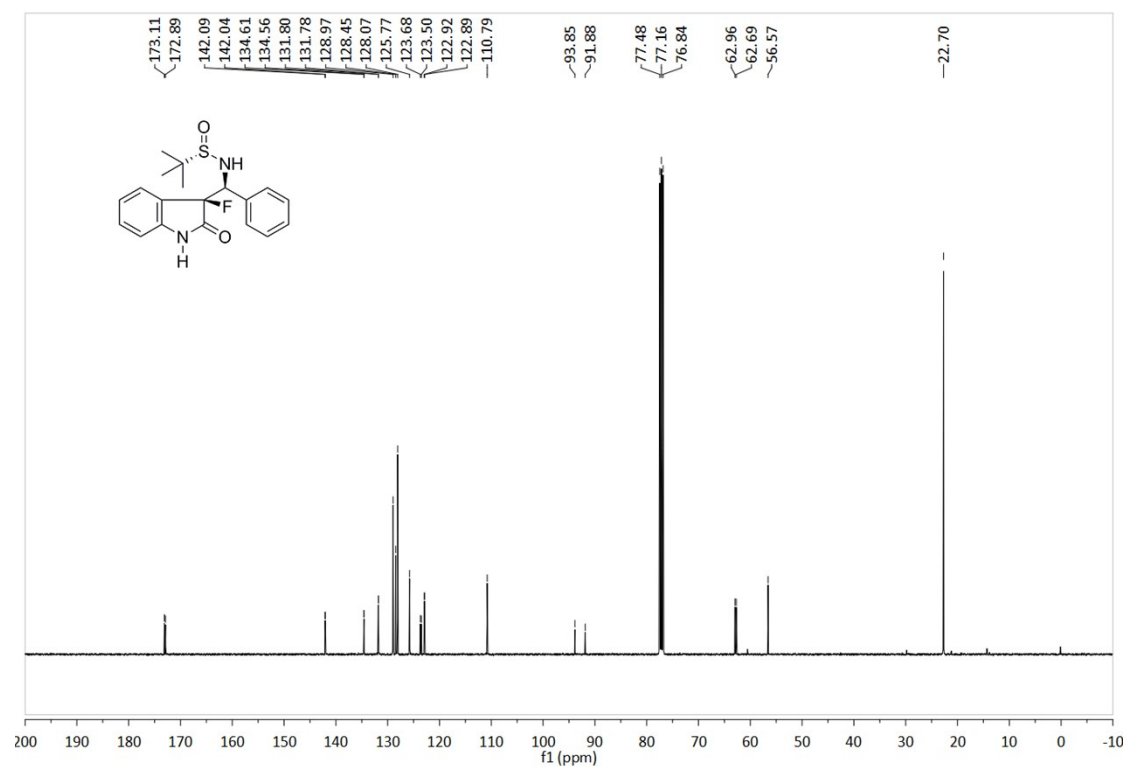

$^{19}\text{F}$  NMR spectrum of **11ai**

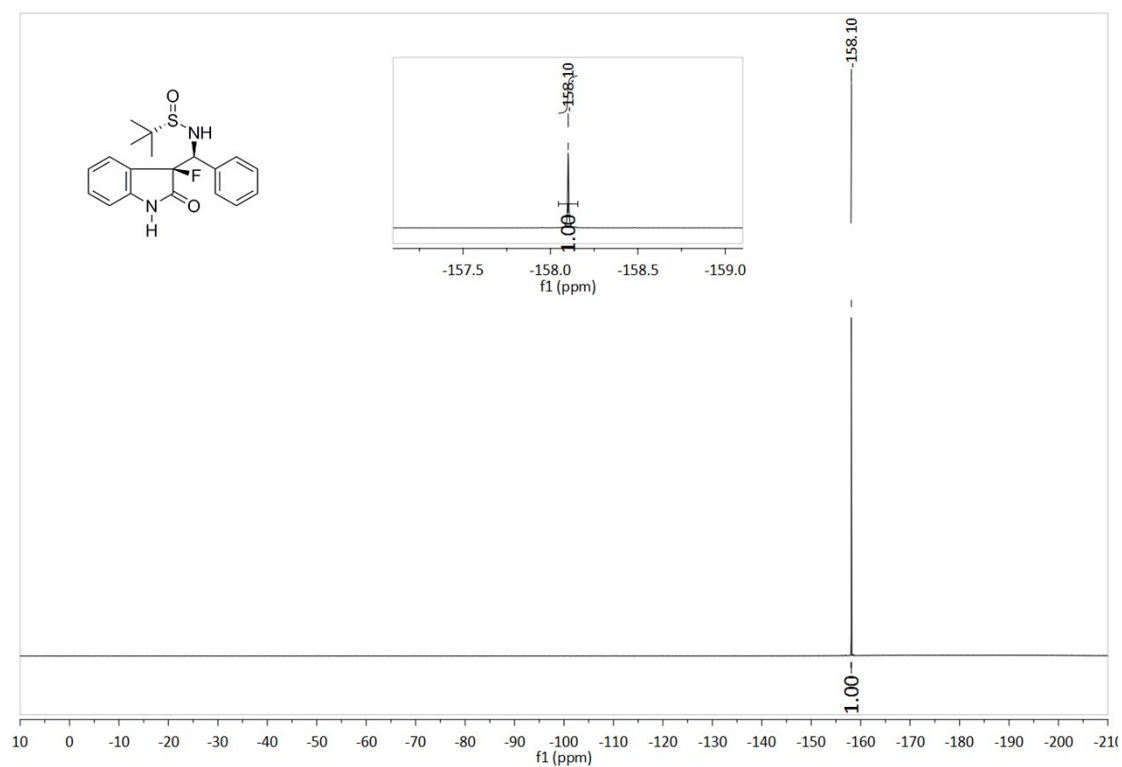

$^{19}\text{F}$  NMR spectrum of the crude reaction mixture

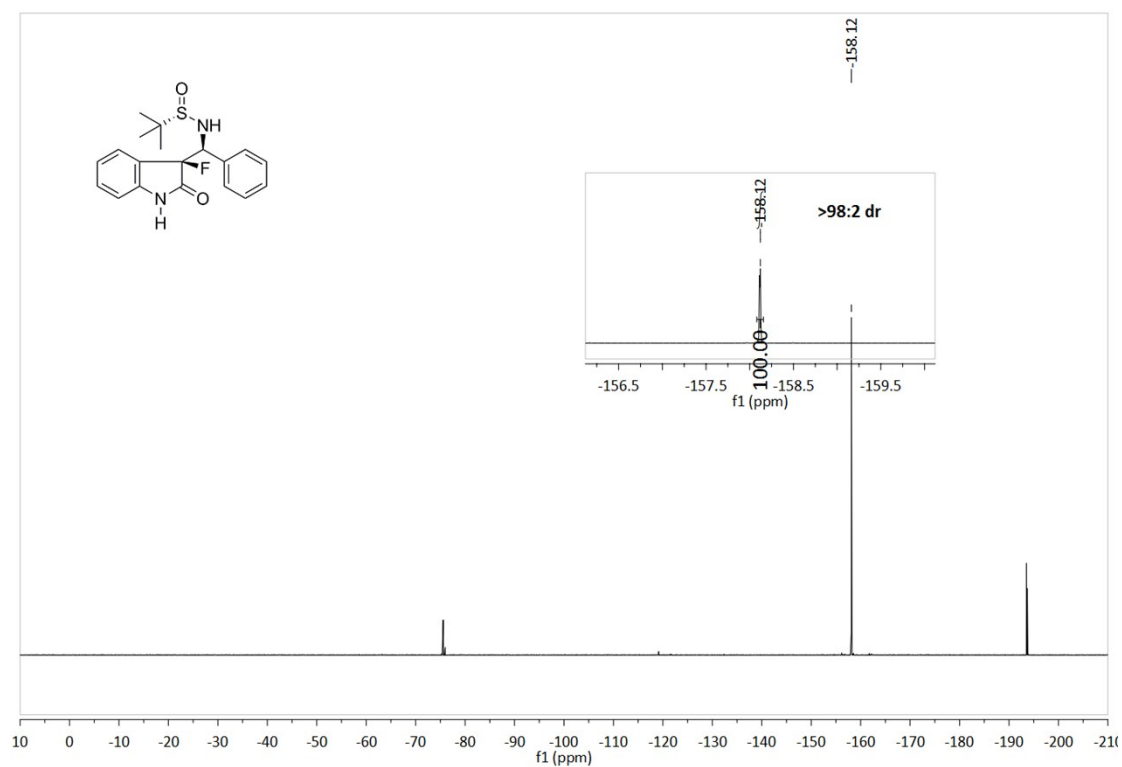

<sup>1</sup>H NMR spectrum of **11aj**

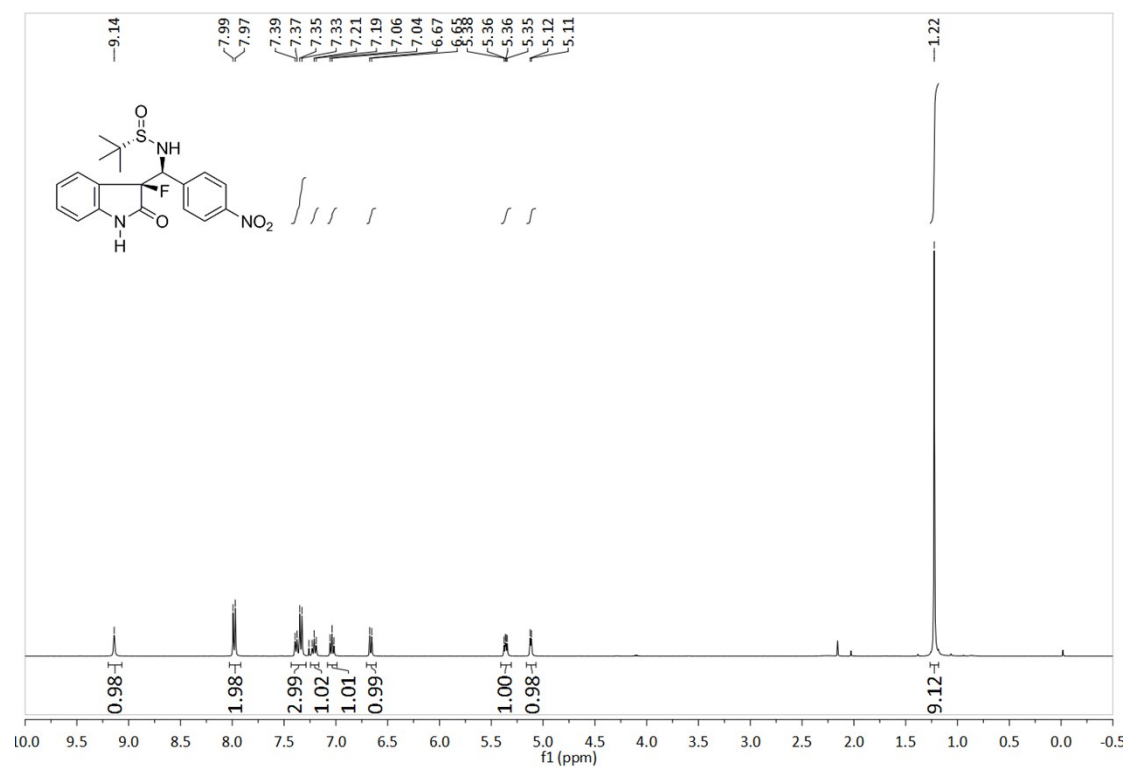

<sup>13</sup>C NMR spectrum of **11aj**

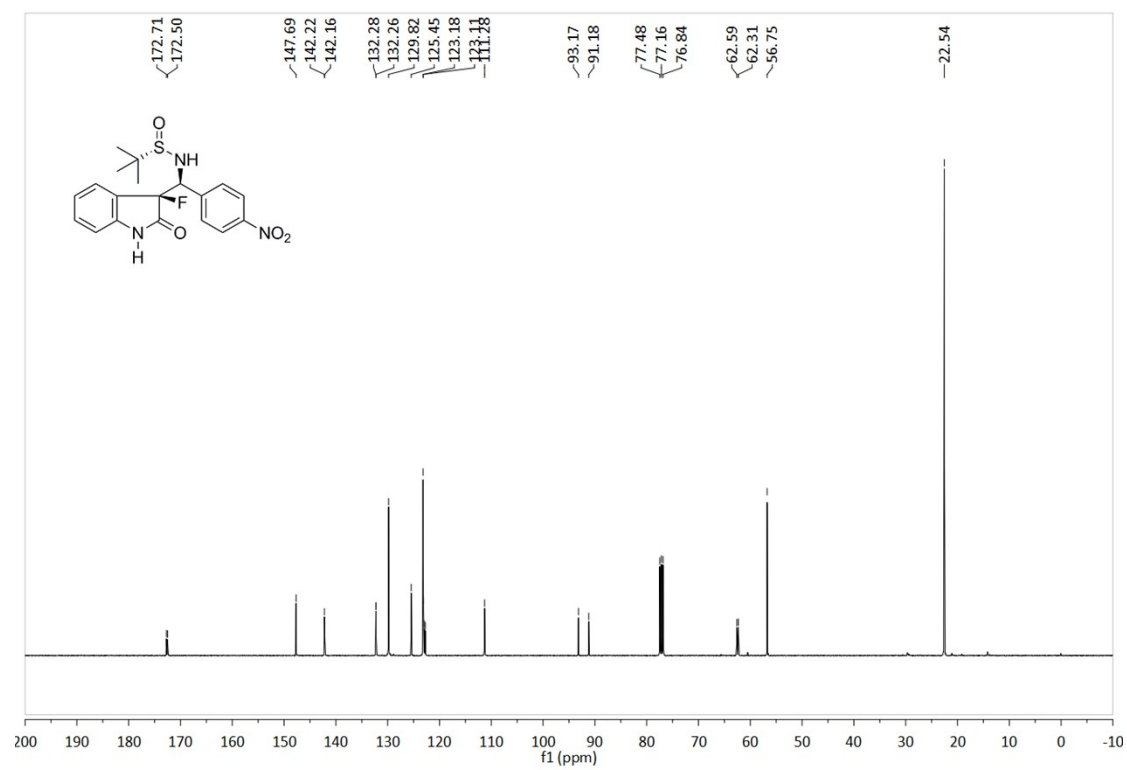

$^{19}\text{F}$  NMR spectrum of **11aj**

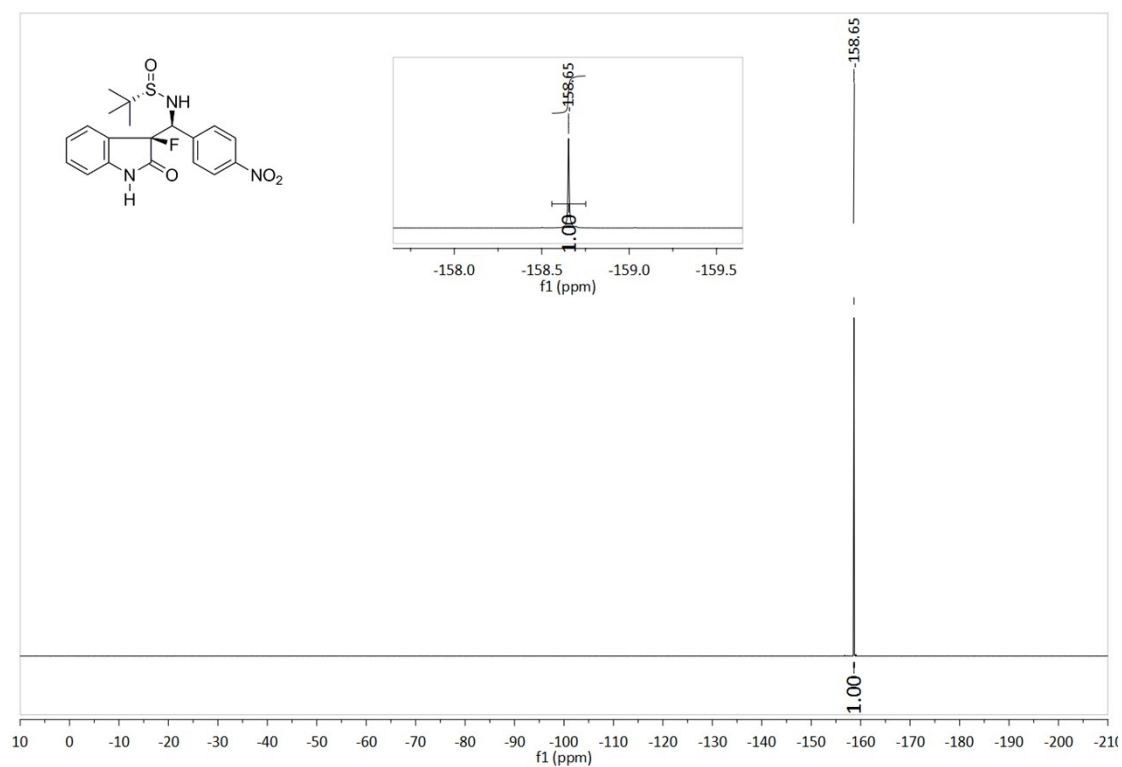

$^{19}\text{F}$  NMR spectrum of the crude reaction mixture

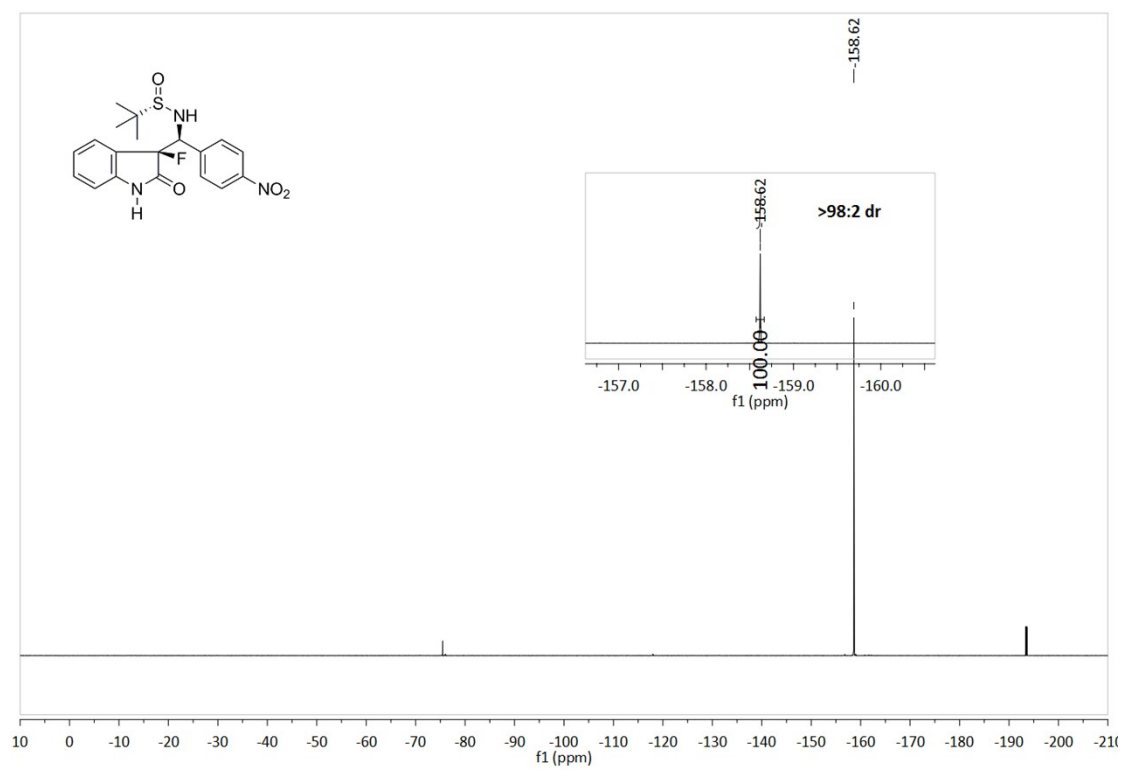

<sup>1</sup>H NMR spectrum of **11ak**

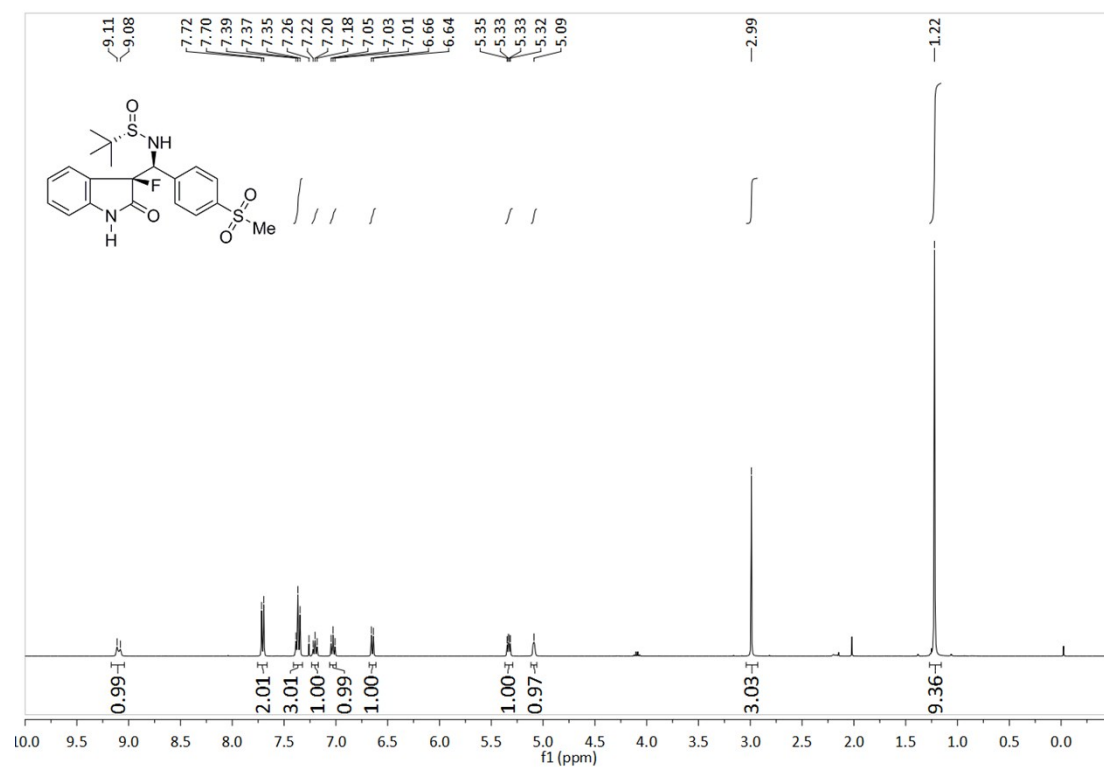

<sup>13</sup>C NMR spectrum of **11ak**

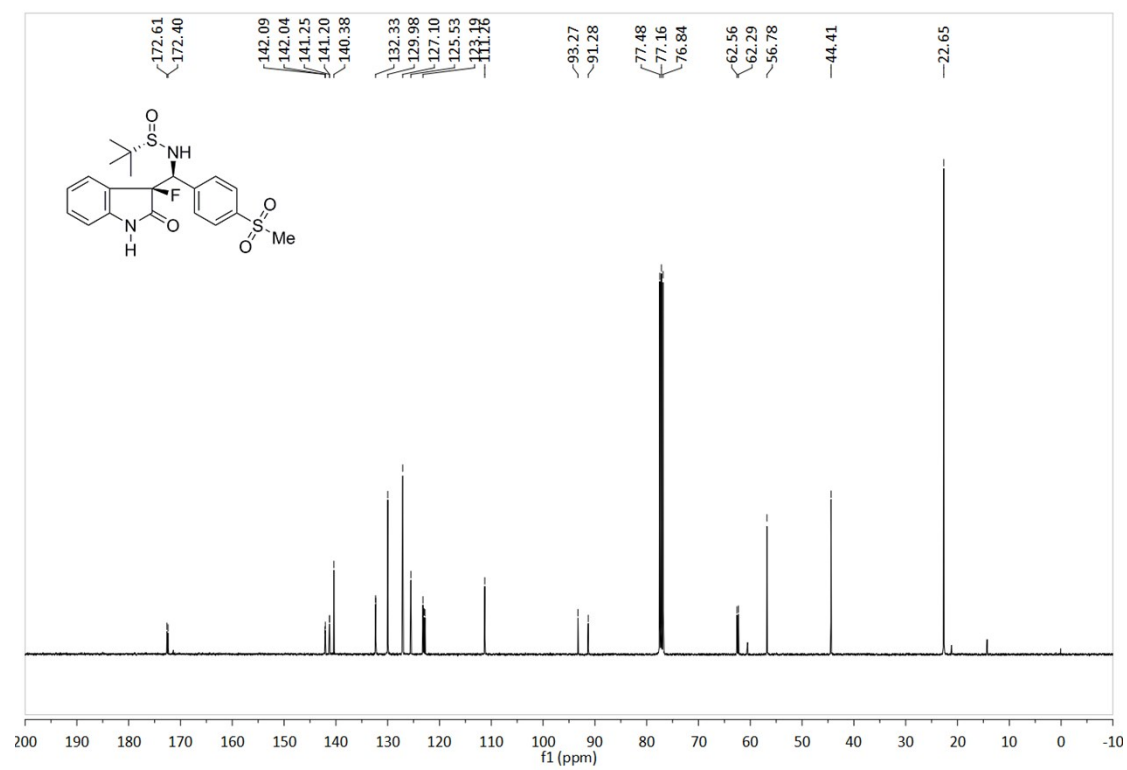

$^{19}\text{F}$  NMR spectrum of **11ak**

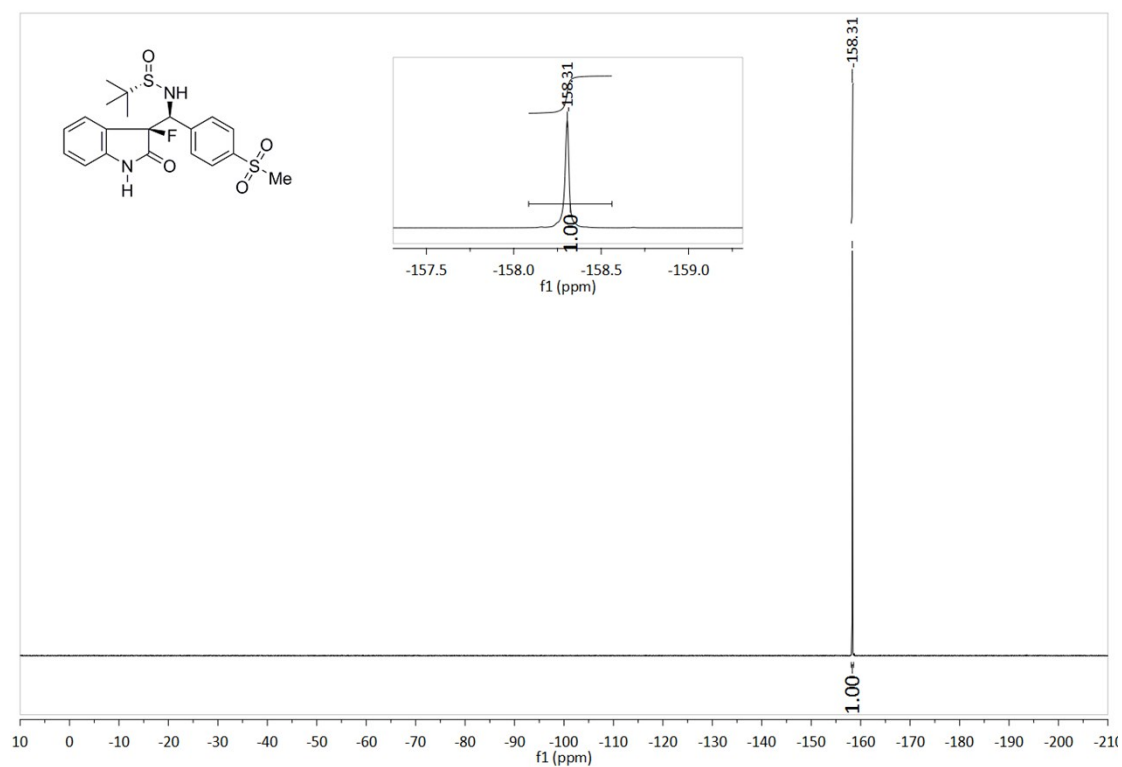

$^{19}\text{F}$  NMR spectrum of the crude reaction mixture

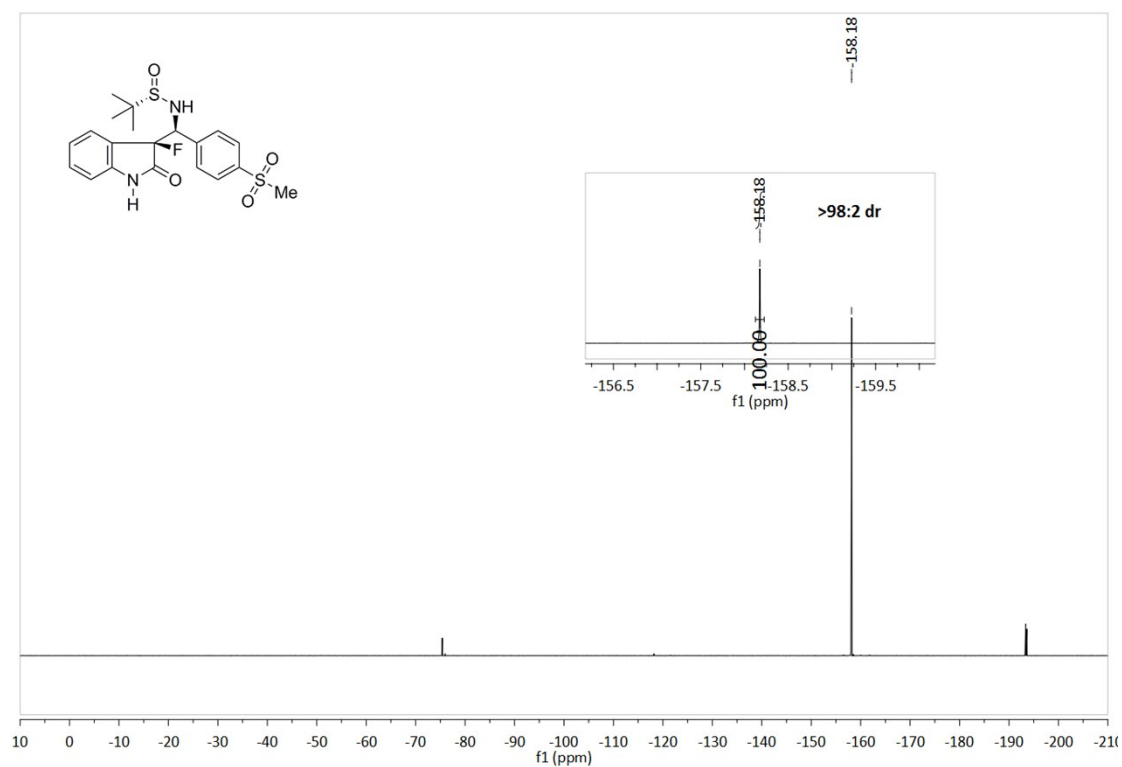

### <sup>1</sup>H NMR spectrum of **11a**

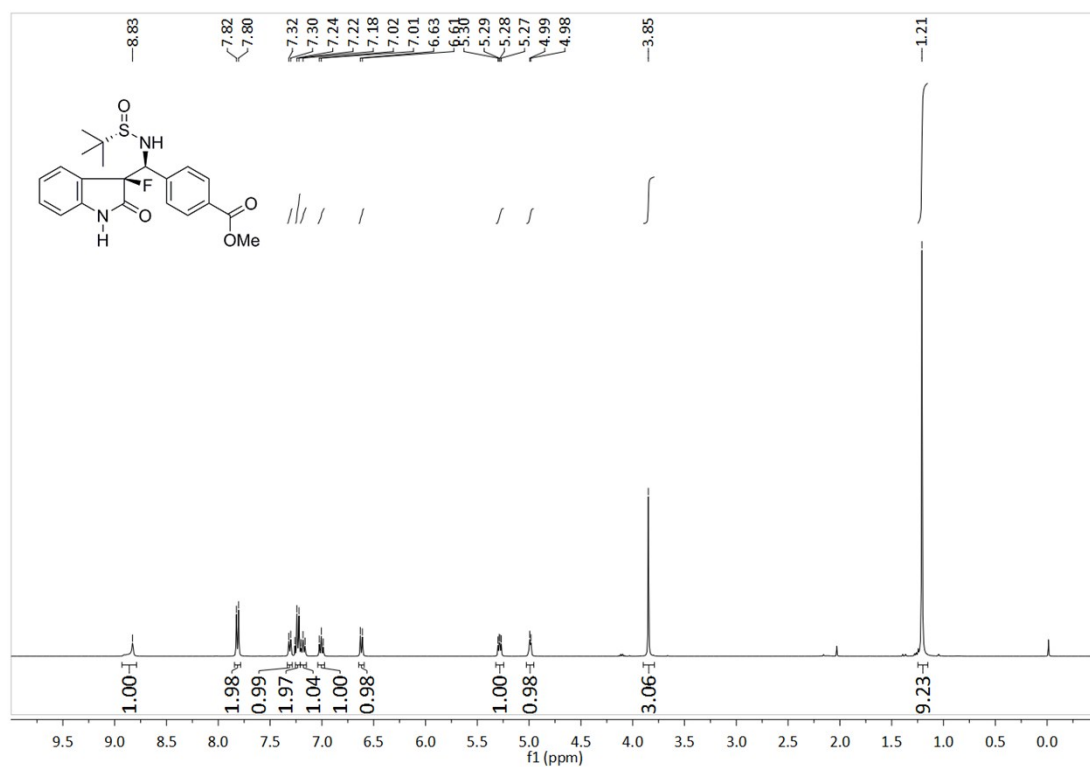

### <sup>13</sup>C NMR spectrum of **11a**

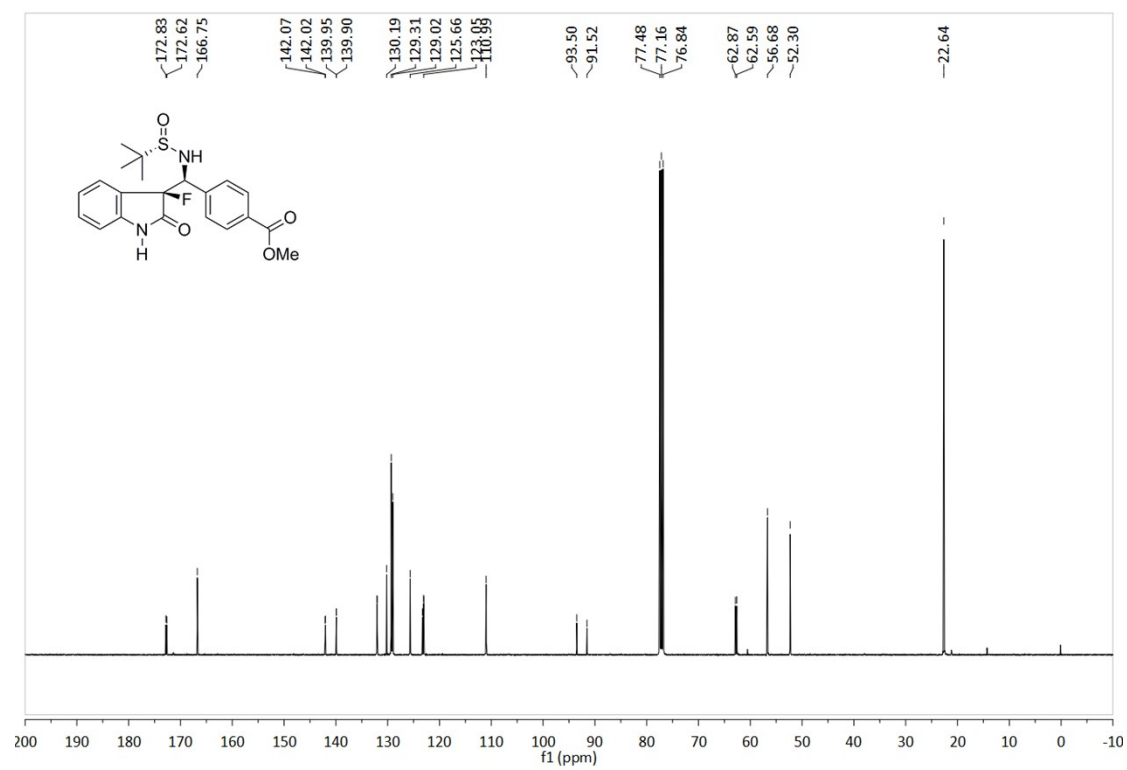

<sup>19</sup>F NMR spectrum of **11a**

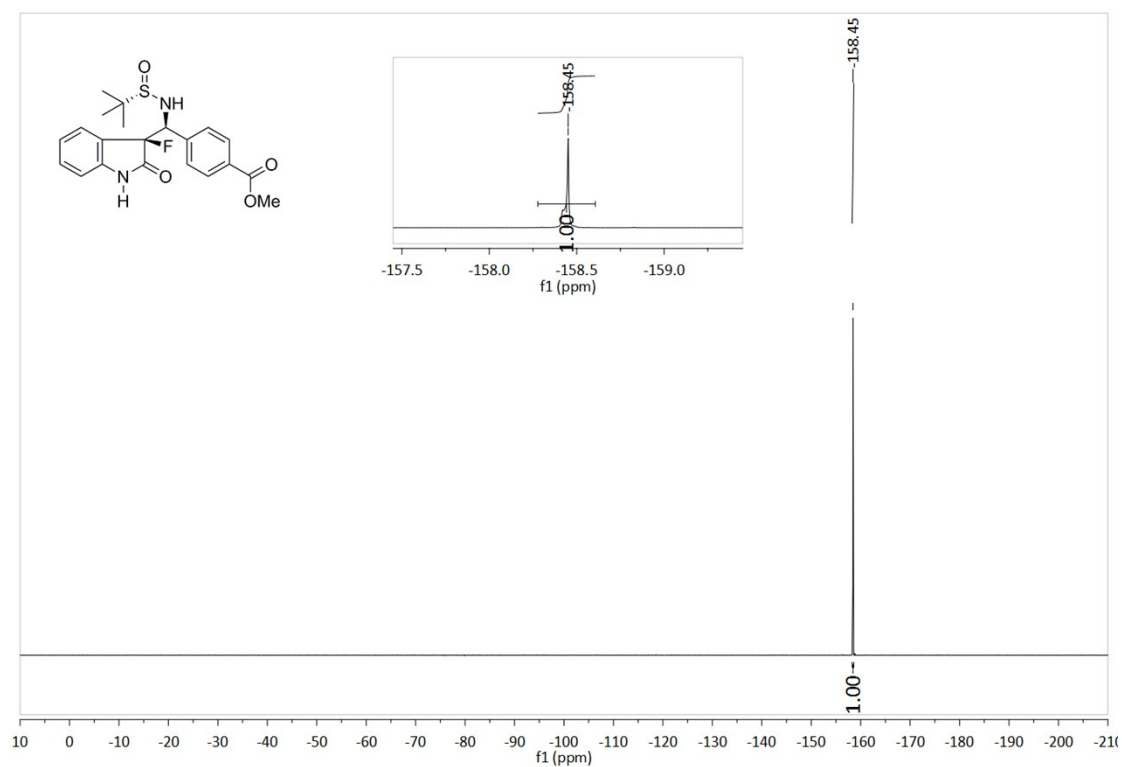

<sup>19</sup>F NMR spectrum of the crude reaction mixture

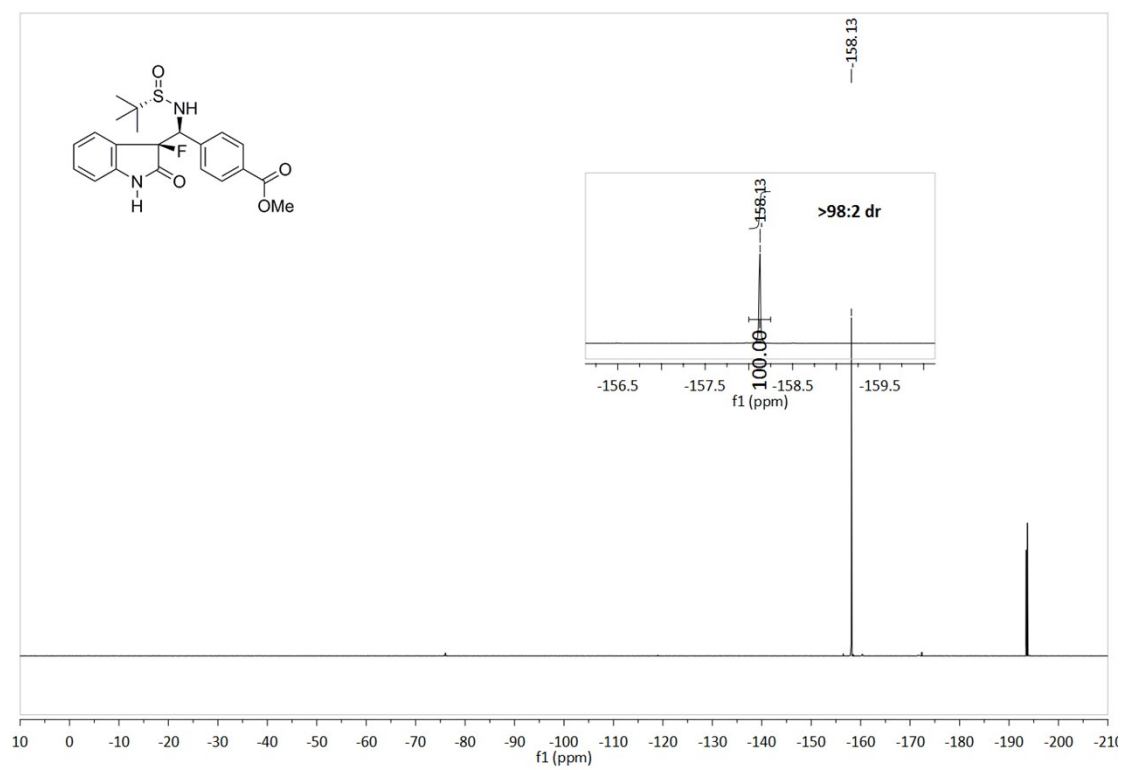



<sup>1</sup>H NMR spectrum of **11am**

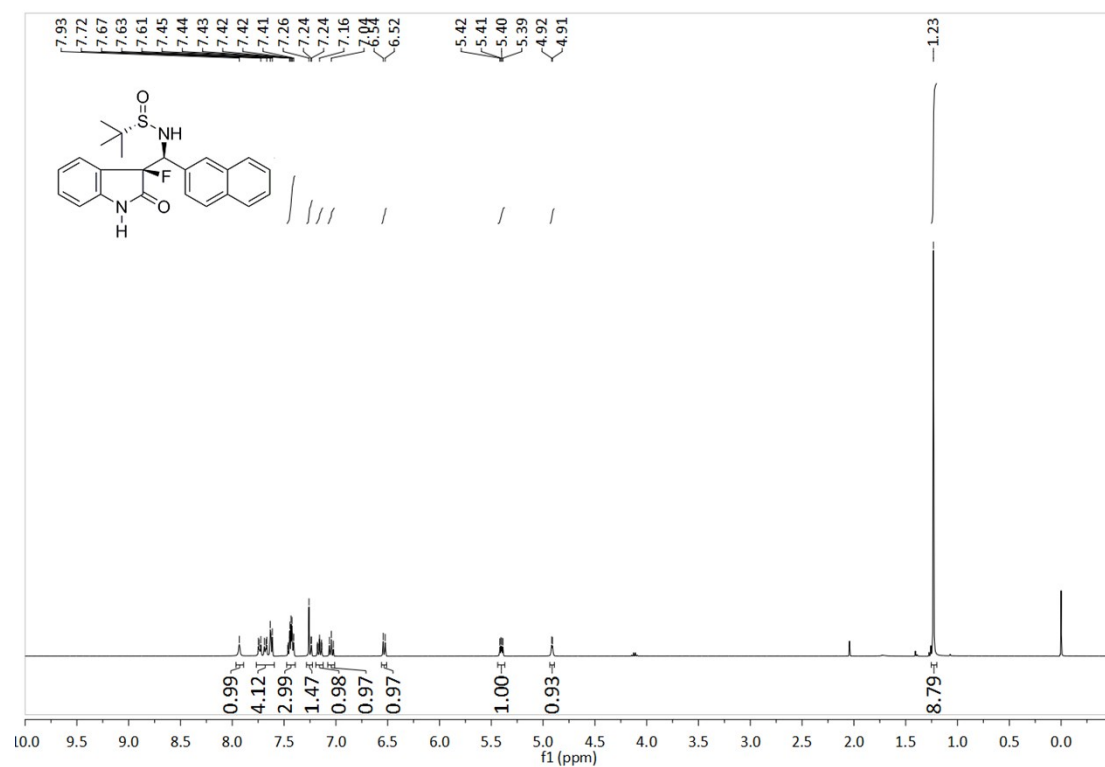

<sup>13</sup>C NMR spectrum of **11am**

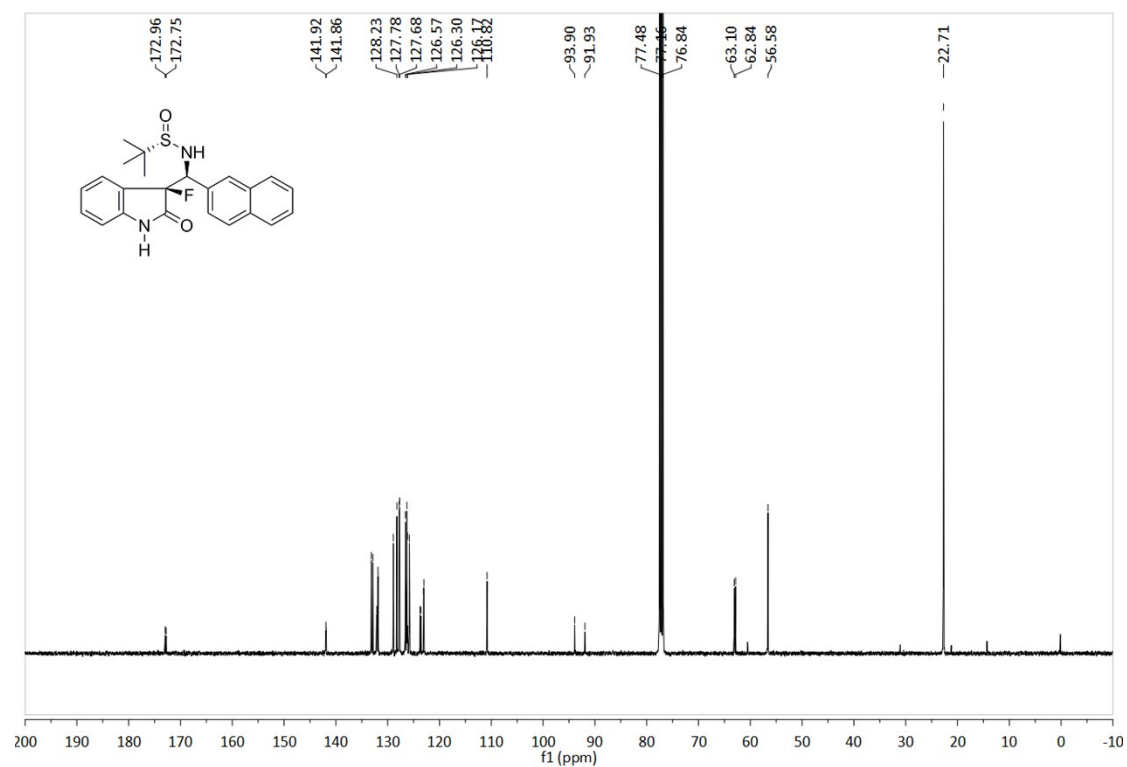

<sup>19</sup>F NMR spectrum of **11am**

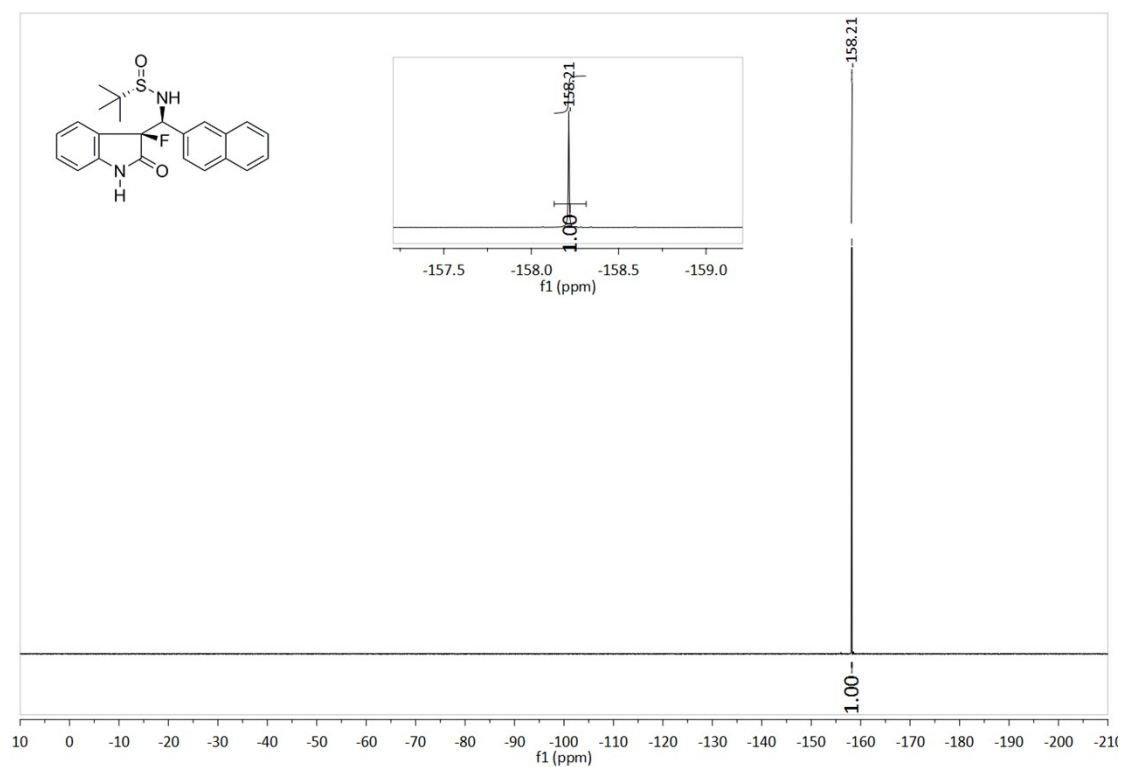

<sup>19</sup>F NMR spectrum of the crude reaction mixture

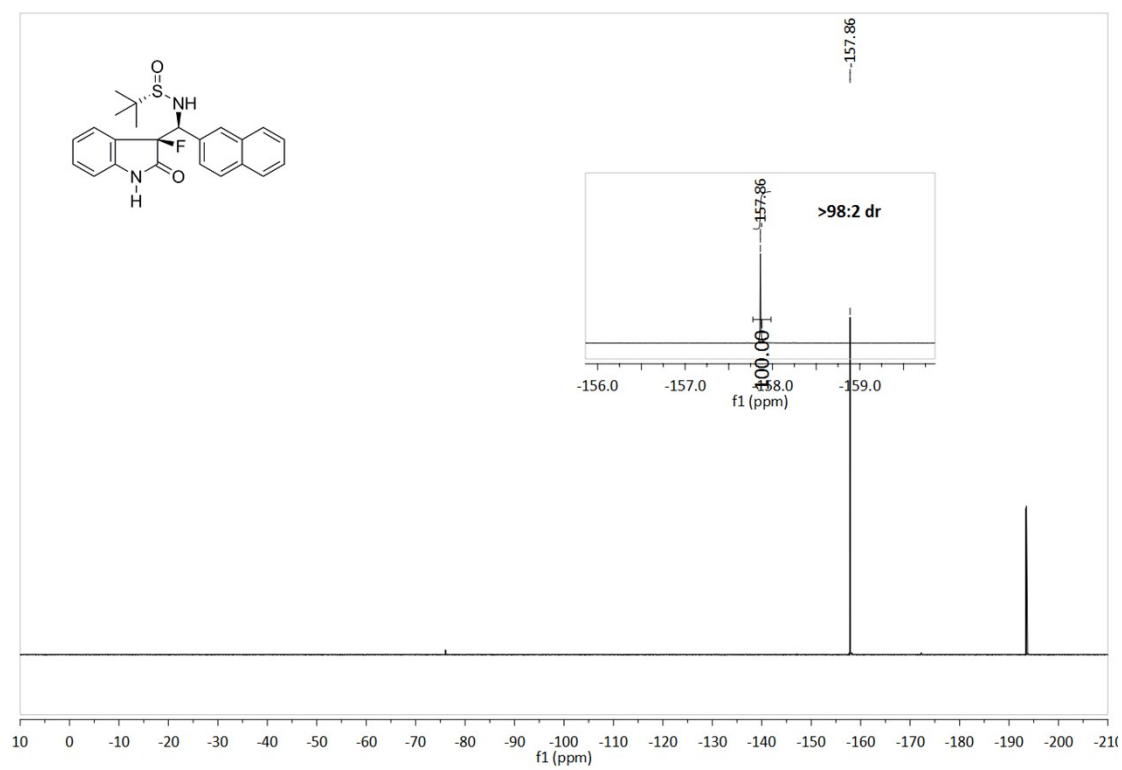

<sup>1</sup>H NMR spectrum of **11an**

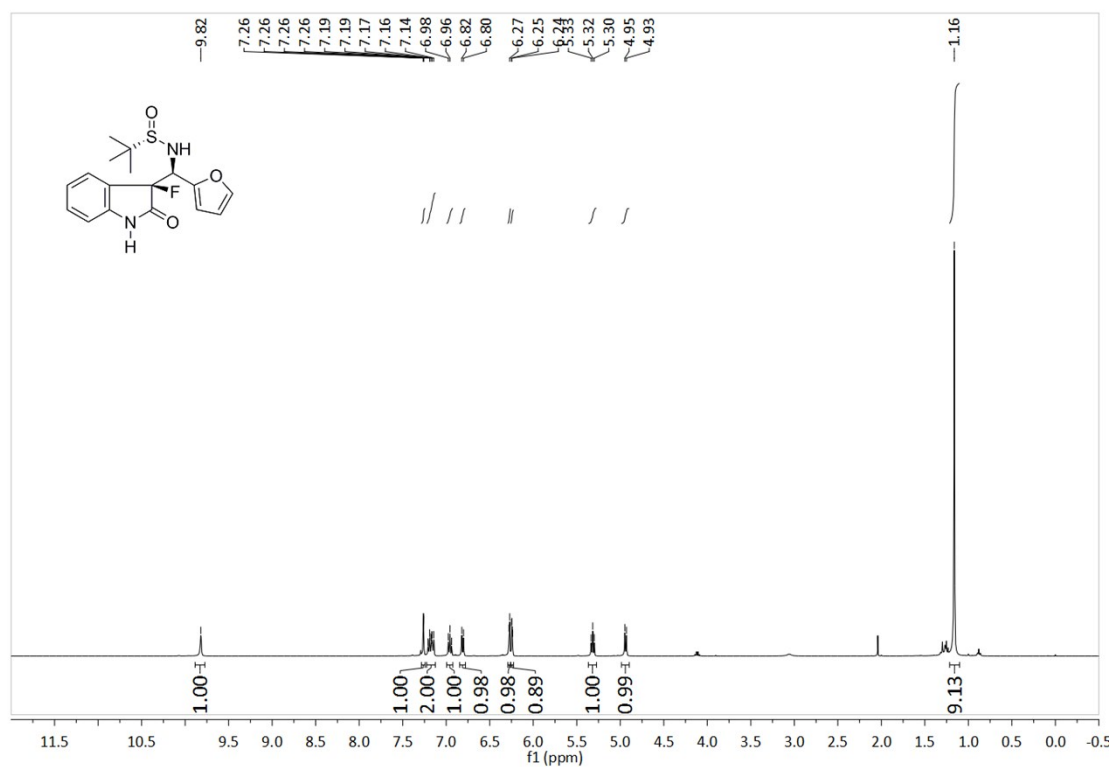

<sup>13</sup>C NMR spectrum of **11an**

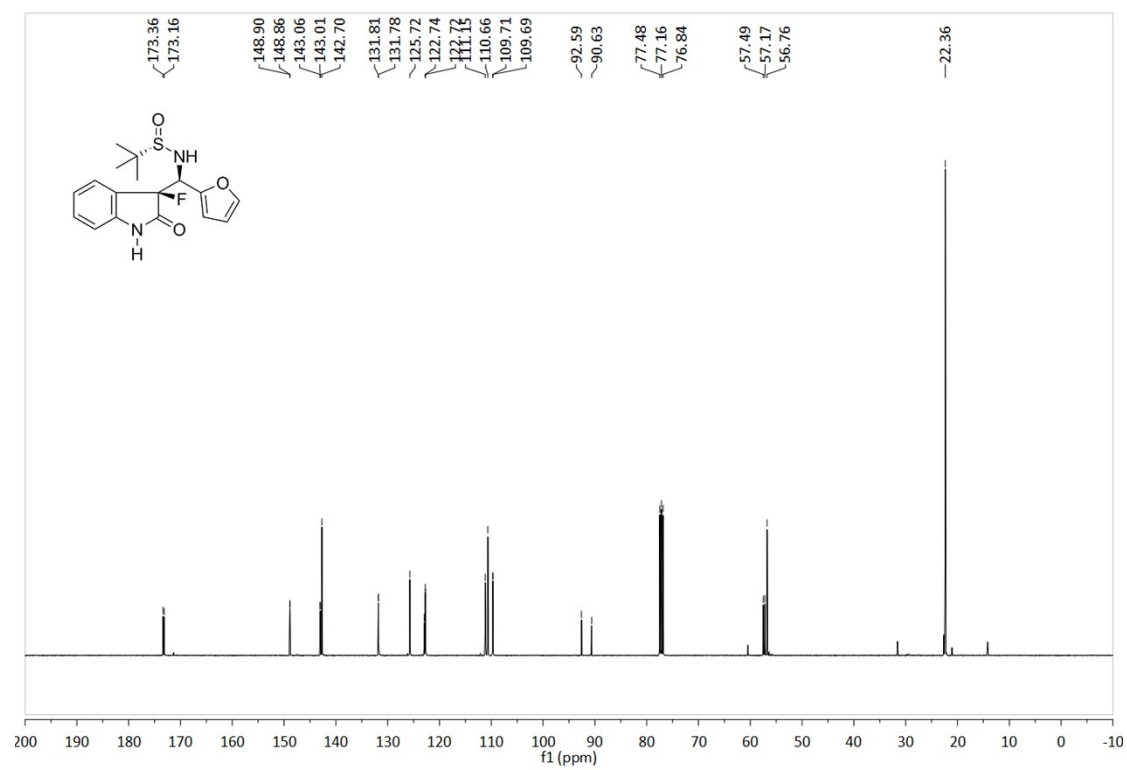

$^{19}\text{F}$  NMR spectrum of **11an**

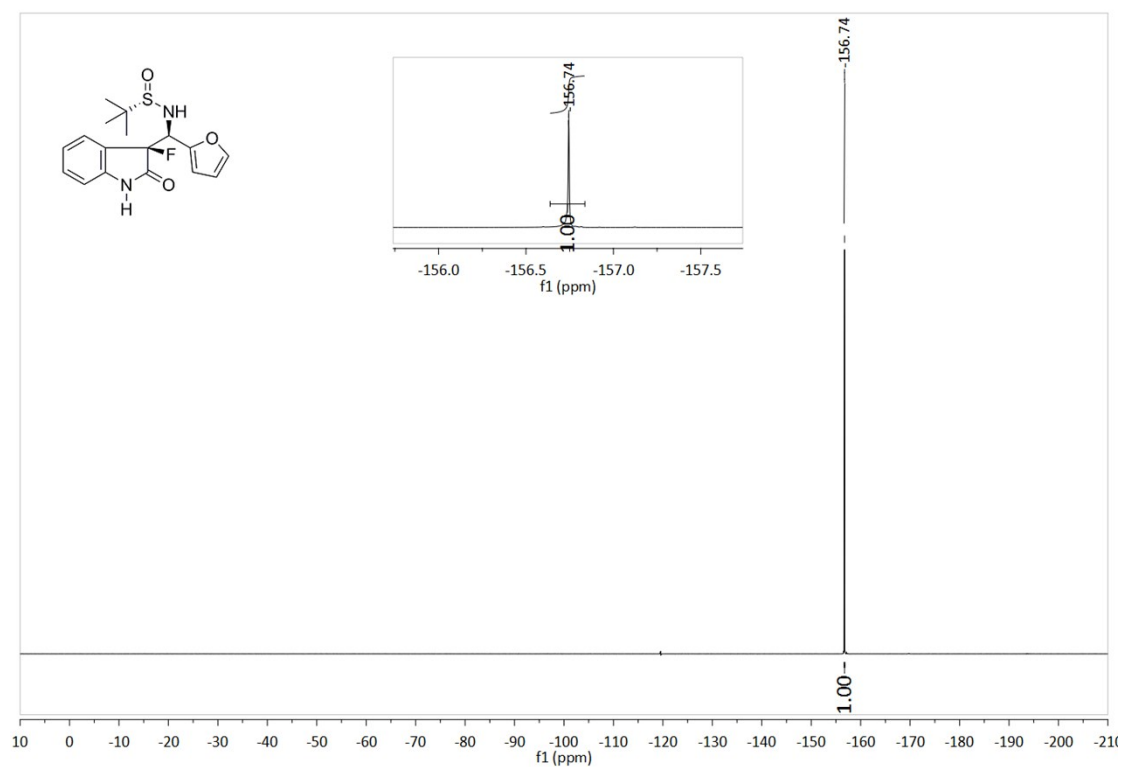

$^{19}\text{F}$  NMR spectrum of the crude reaction mixture

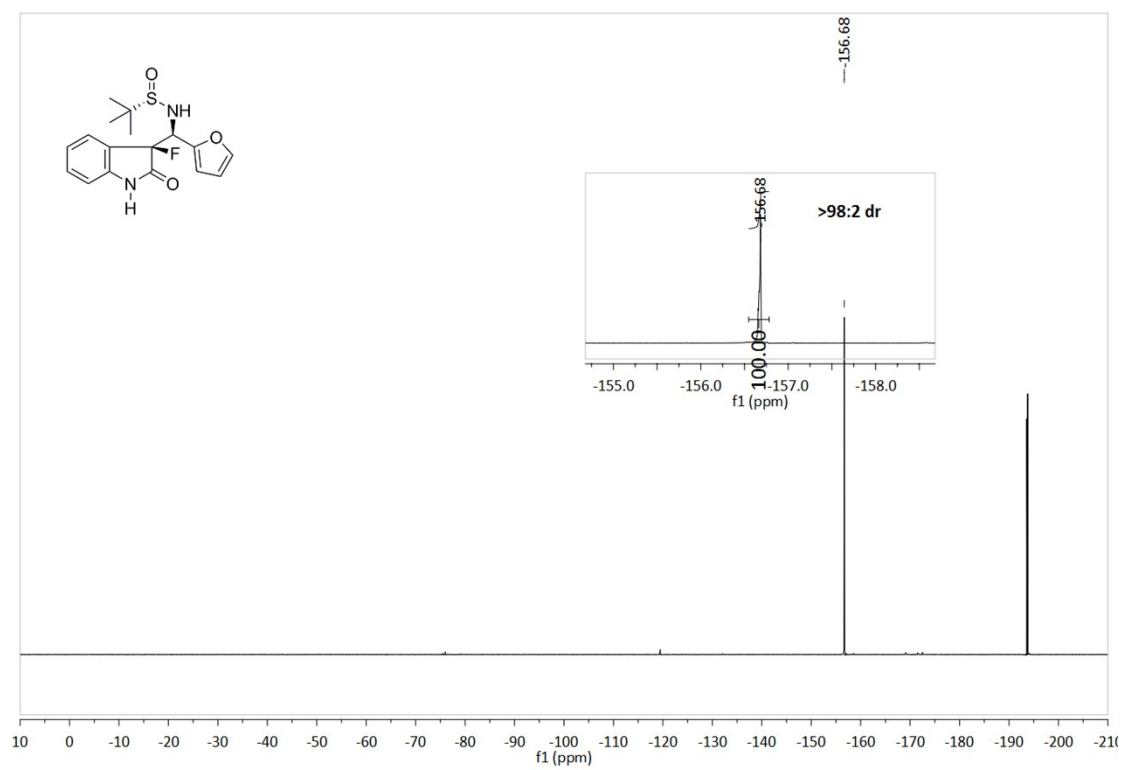

<sup>1</sup>H NMR spectrum of **11ao**

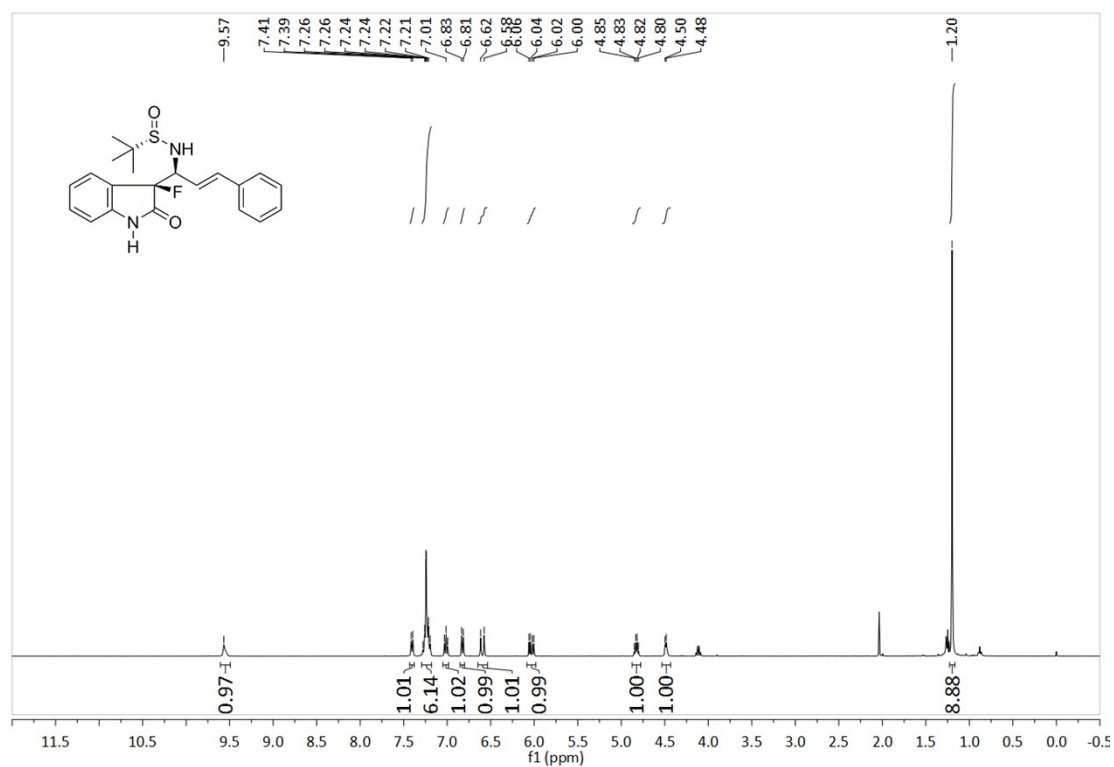

<sup>13</sup>C NMR spectrum of **11ao**

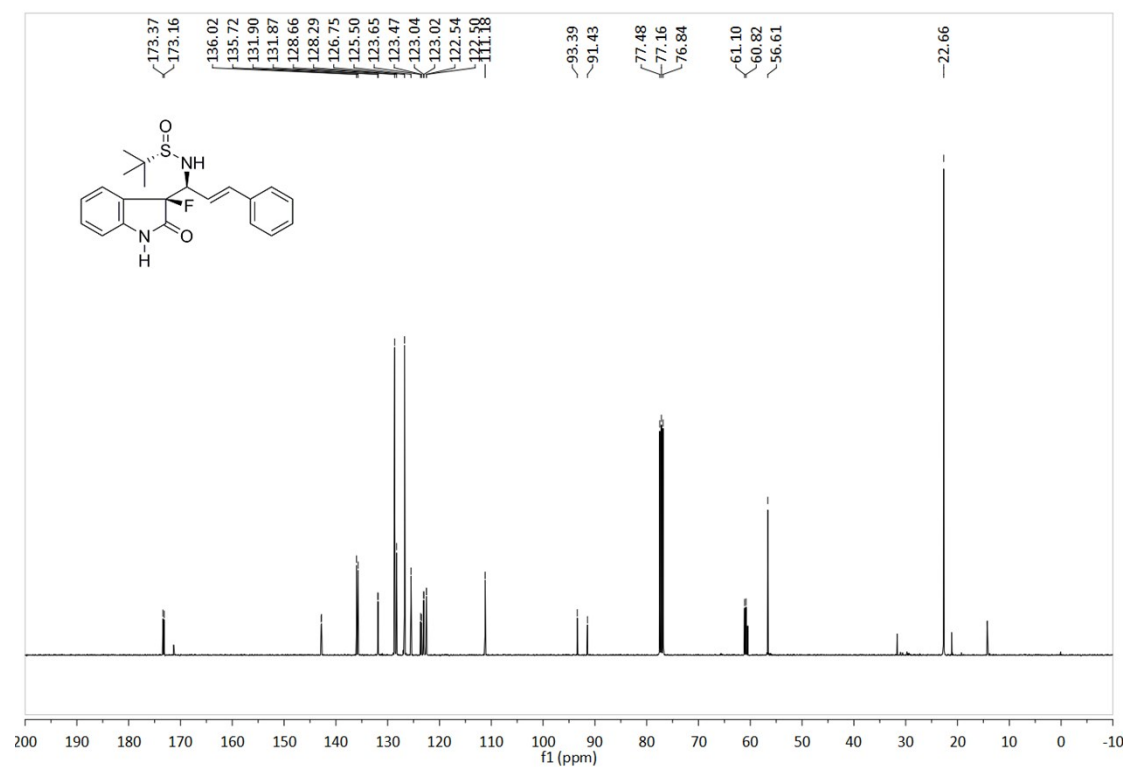

$^{19}\text{F}$  NMR spectrum of **11ao**

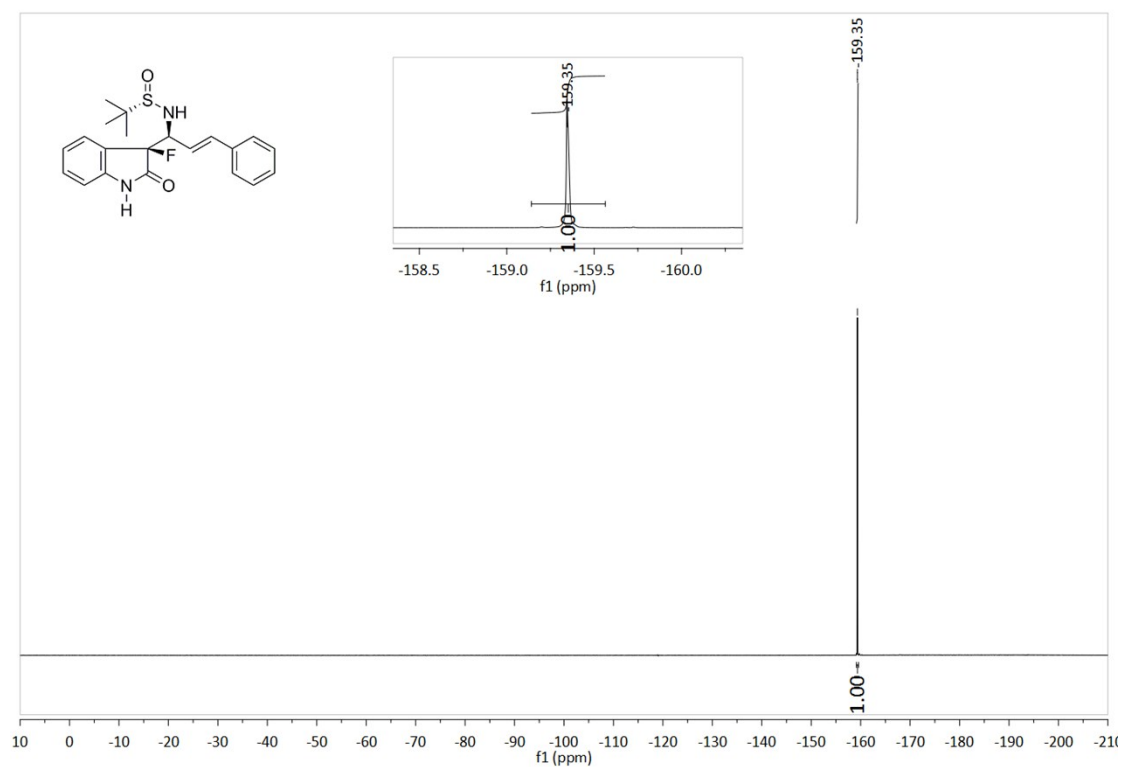

$^{19}\text{F}$  NMR spectrum of the crude reaction mixture

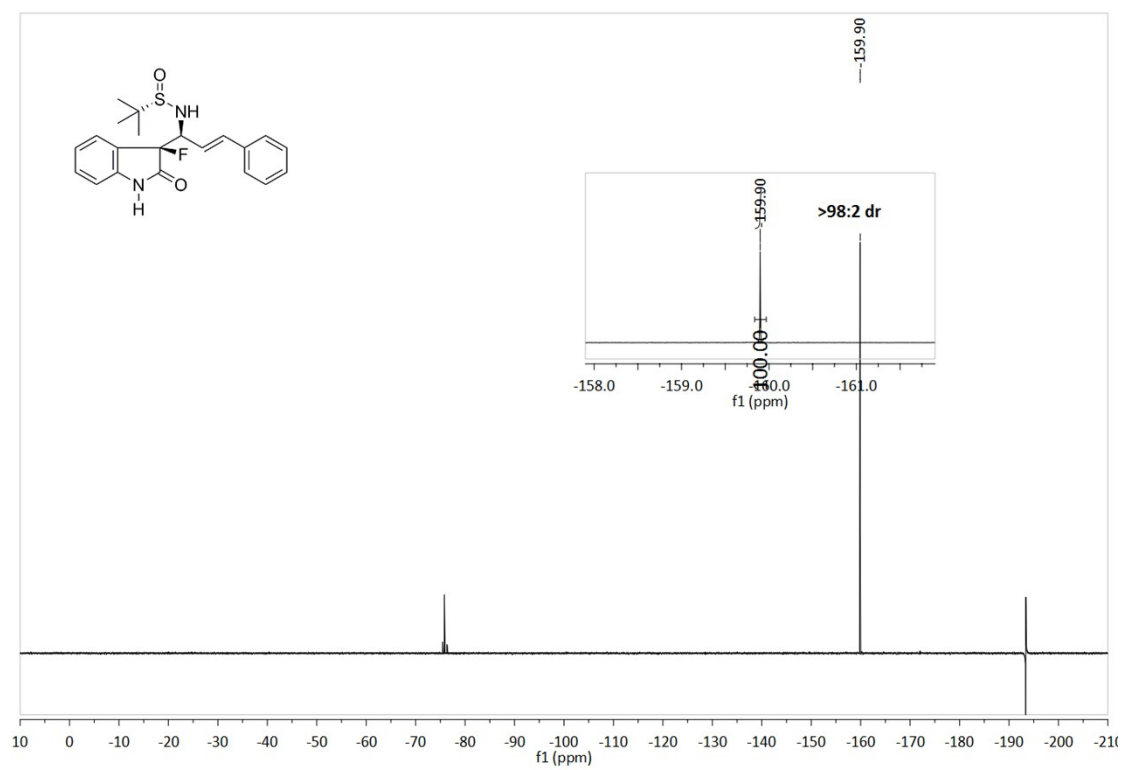

### <sup>1</sup>H NMR spectrum of **11ap**

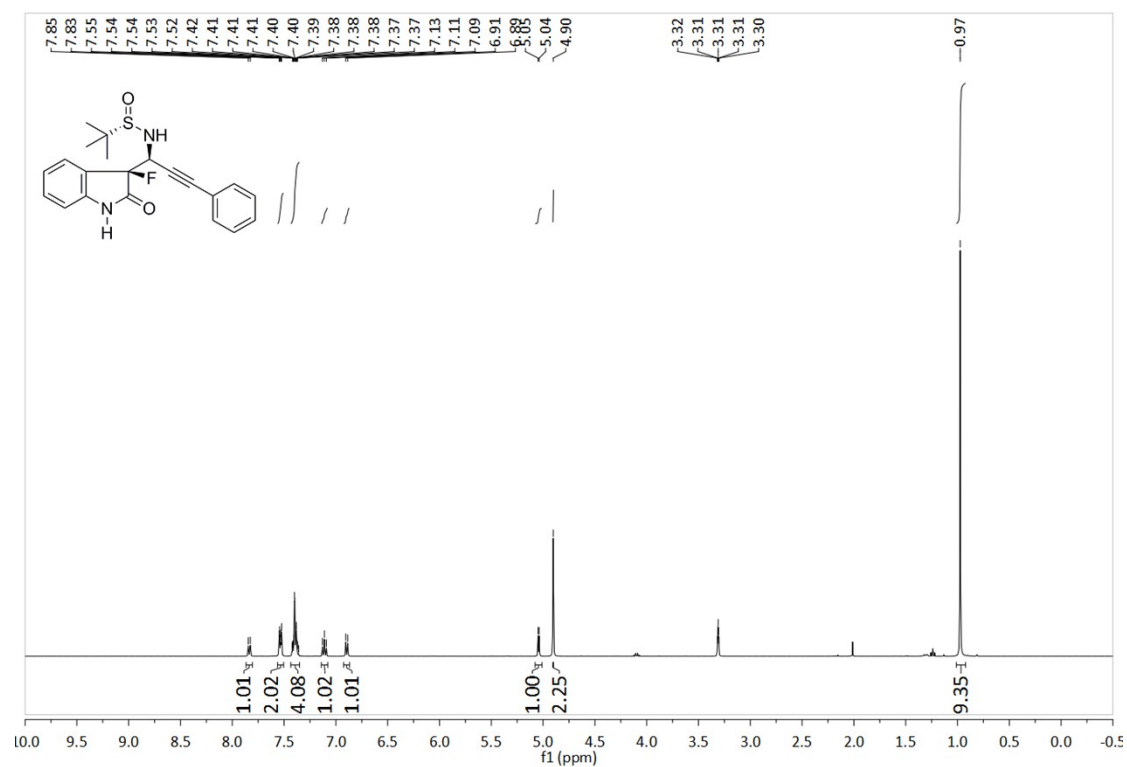

### <sup>13</sup>C NMR spectrum of **11ap**

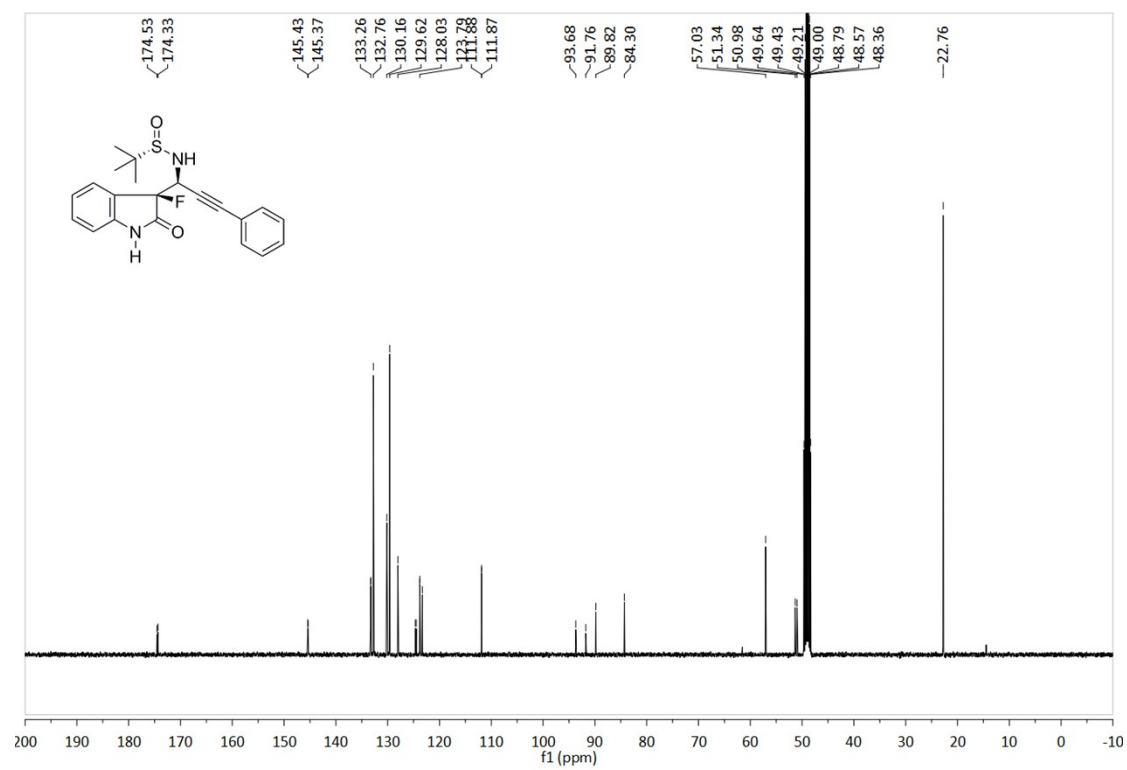

<sup>19</sup>F NMR spectrum of **11ap**

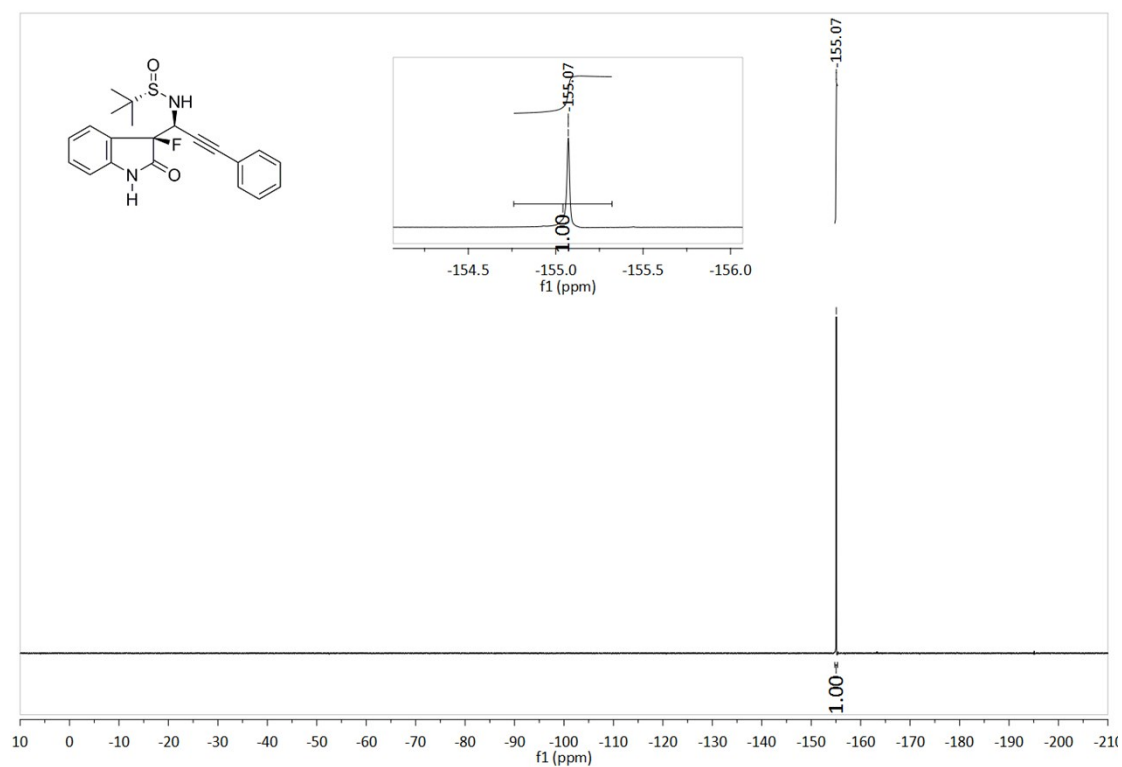

<sup>19</sup>F NMR spectrum of the crude reaction mixture

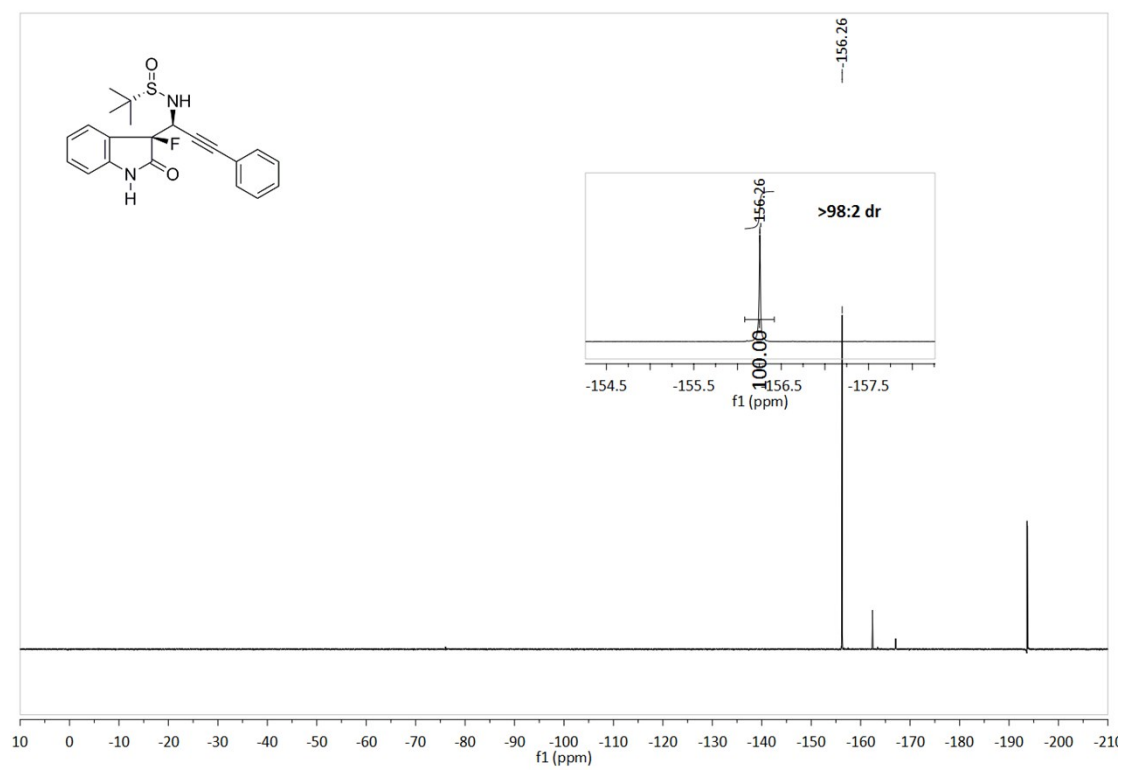



<sup>1</sup>H NMR spectrum of **11aq**

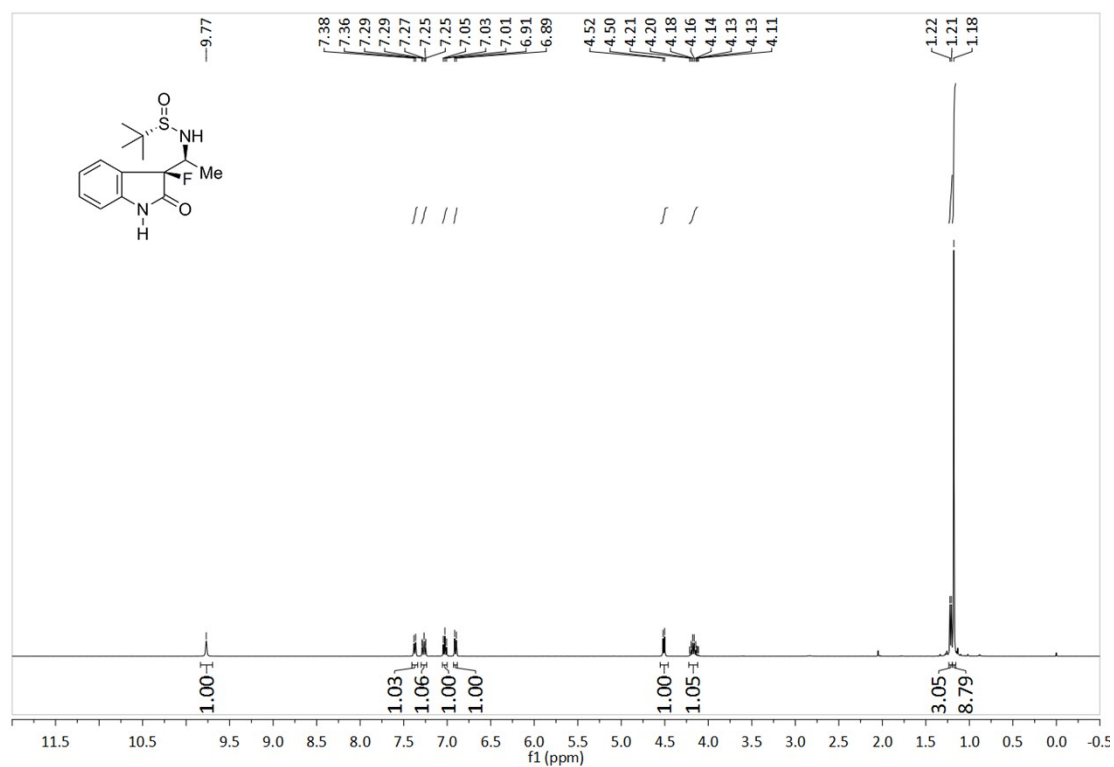

<sup>13</sup>C NMR spectrum of **11aq**

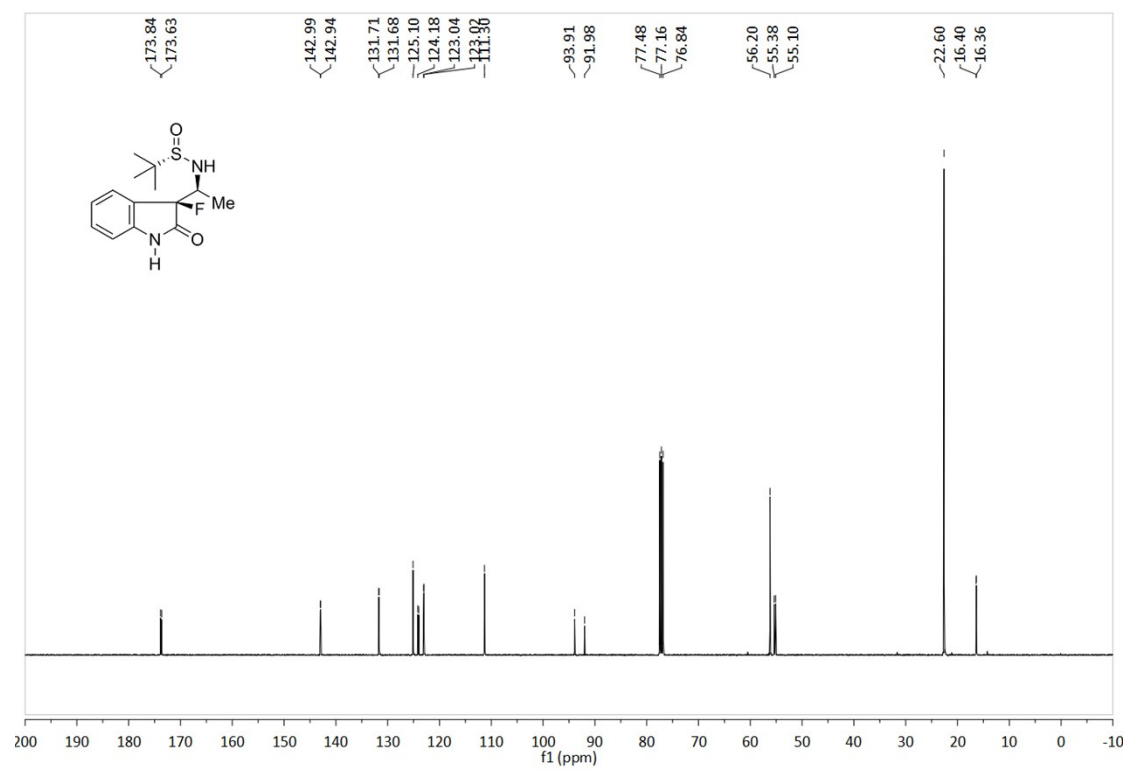

$^{19}\text{F}$  NMR spectrum of **11aq**

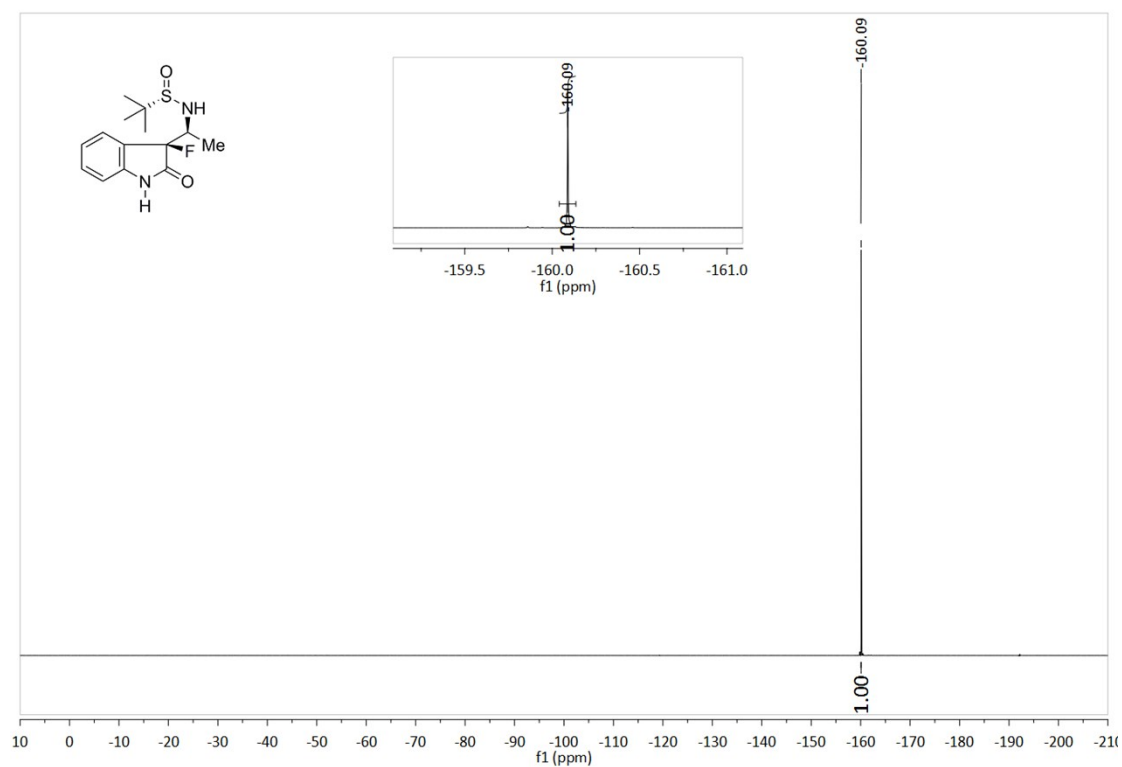

$^{19}\text{F}$  NMR spectrum of the crude reaction mixture

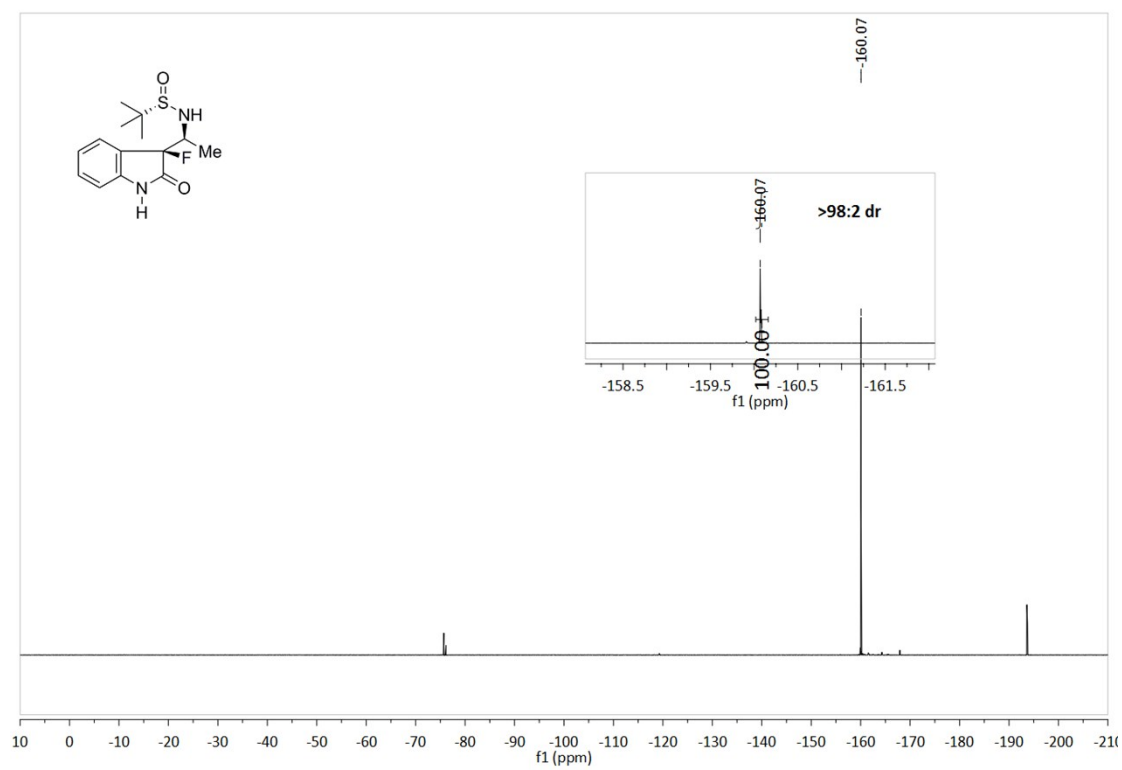

<sup>1</sup>H NMR spectrum of **11ar**

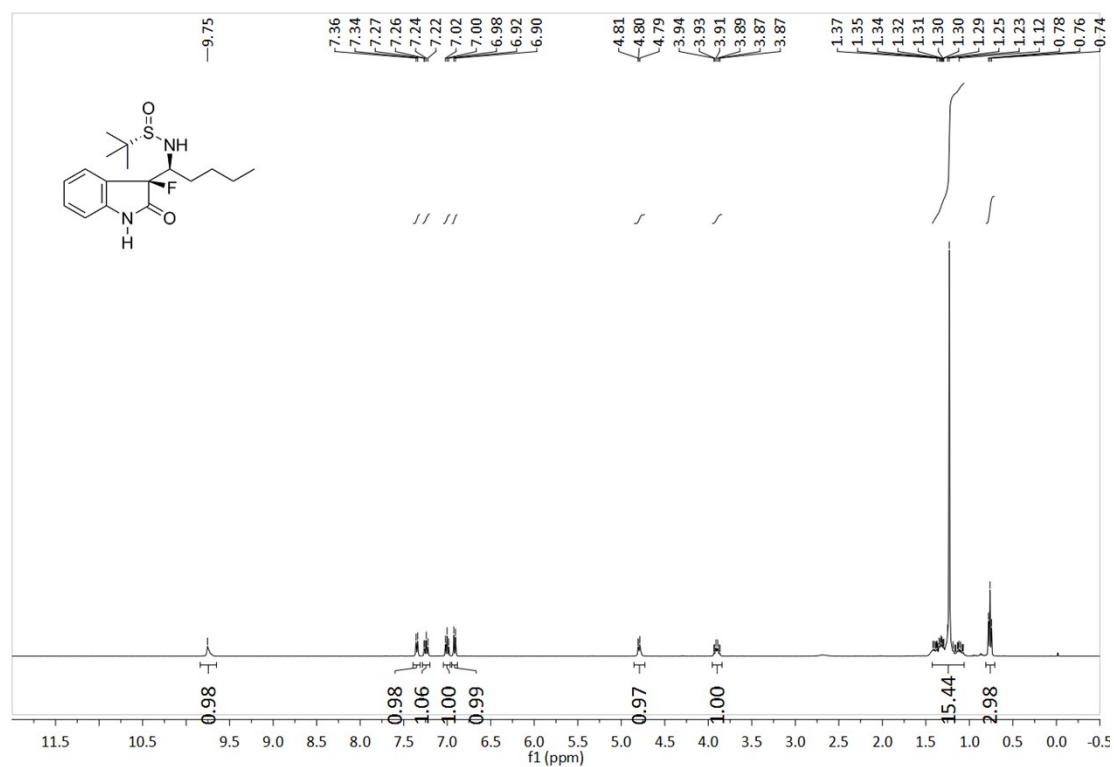

<sup>13</sup>C NMR spectrum of **11ar**

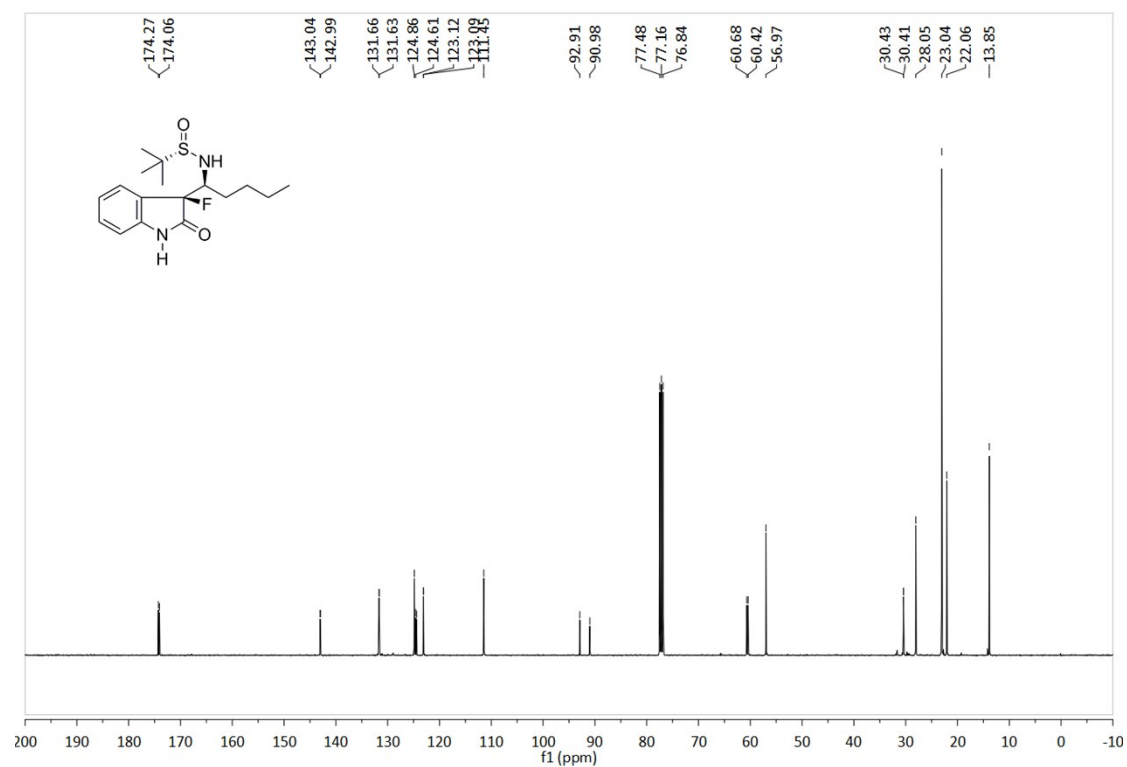

$^{19}\text{F}$  NMR spectrum of **11ar**

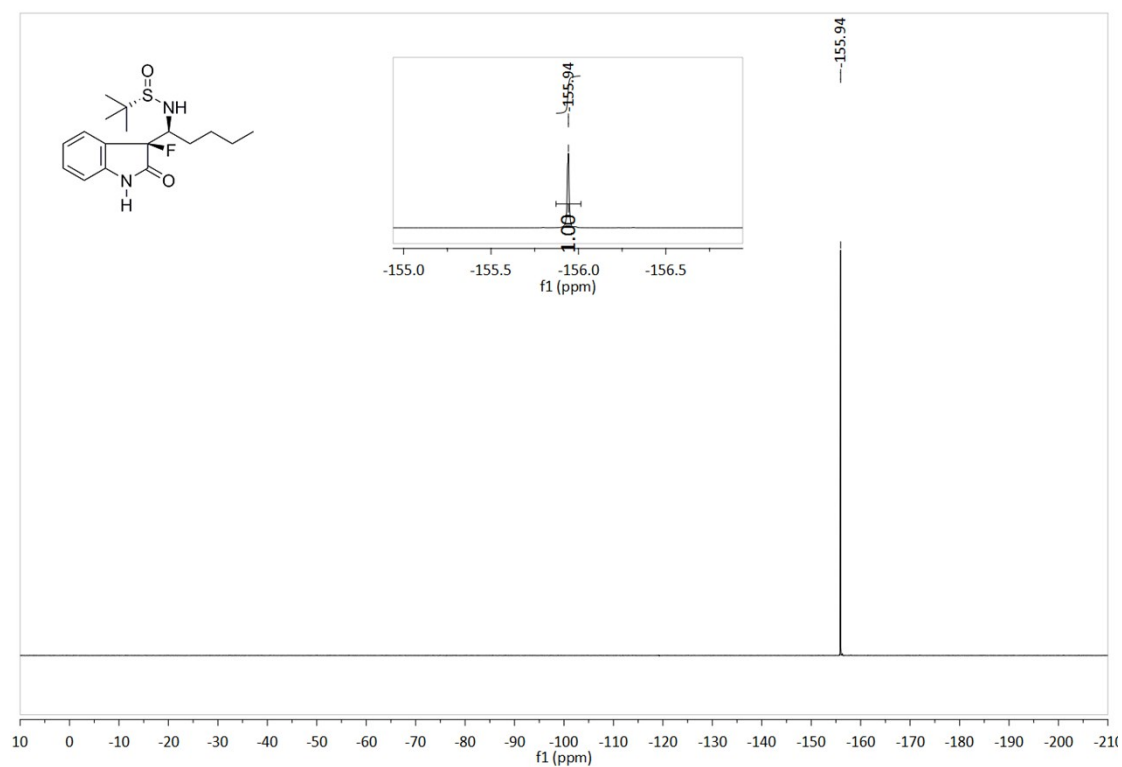

$^{19}\text{F}$  NMR spectrum of the crude reaction mixture

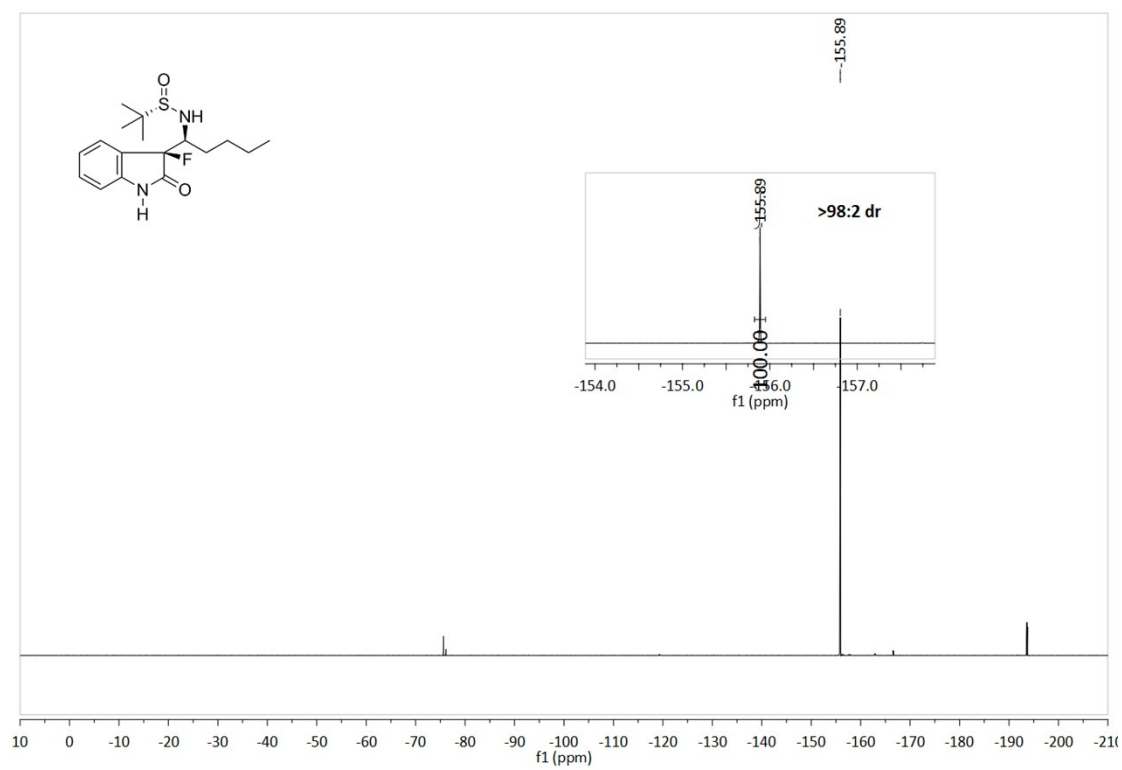

<sup>1</sup>H NMR spectrum of **11bi**

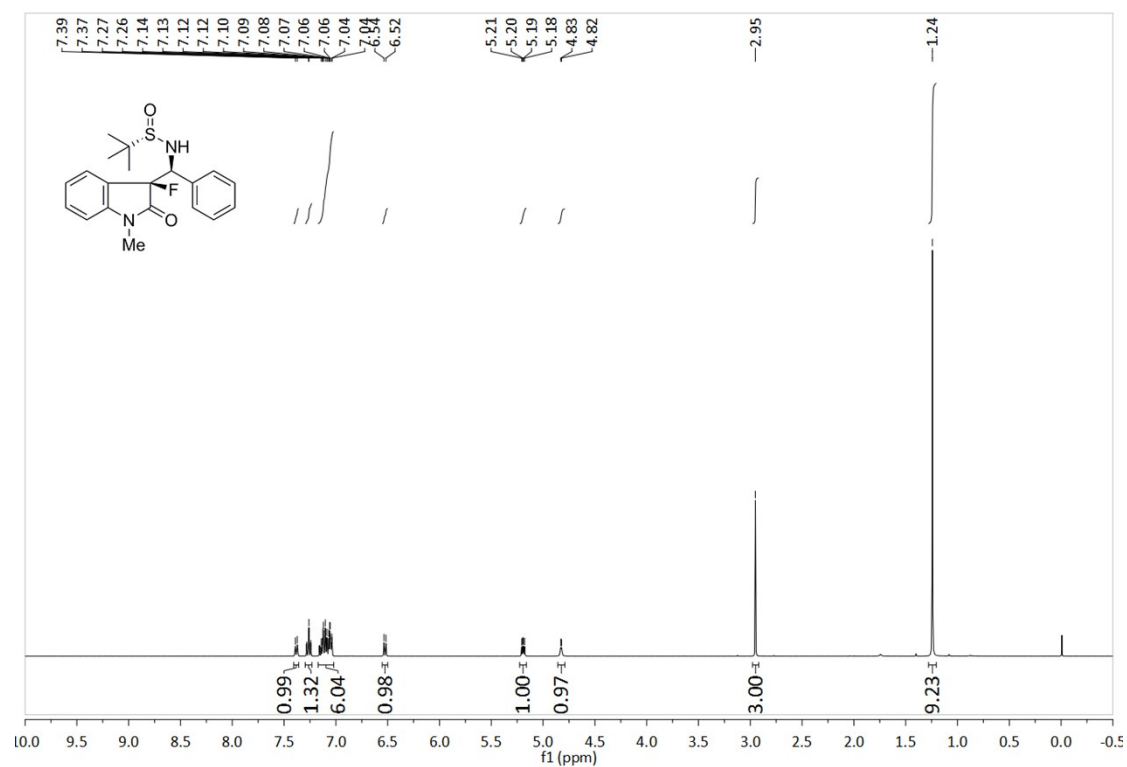

<sup>13</sup>C NMR spectrum of **11bi**

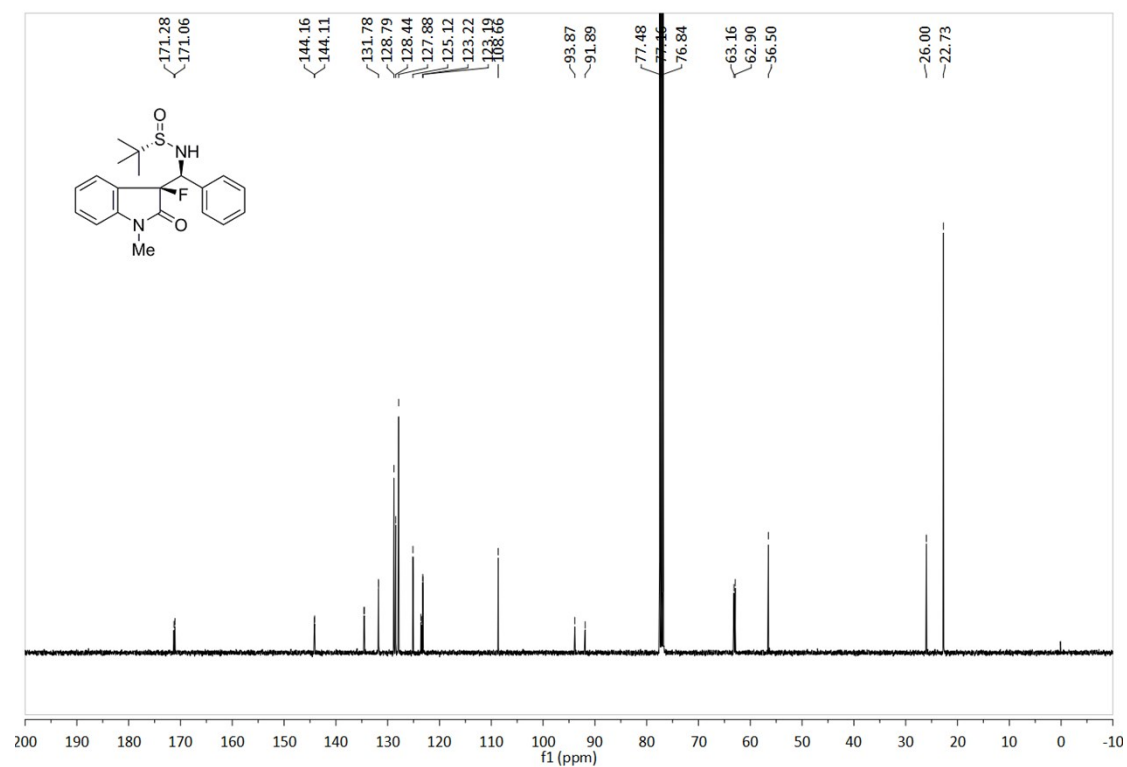

$^{19}\text{F}$  NMR spectrum of **11bi**

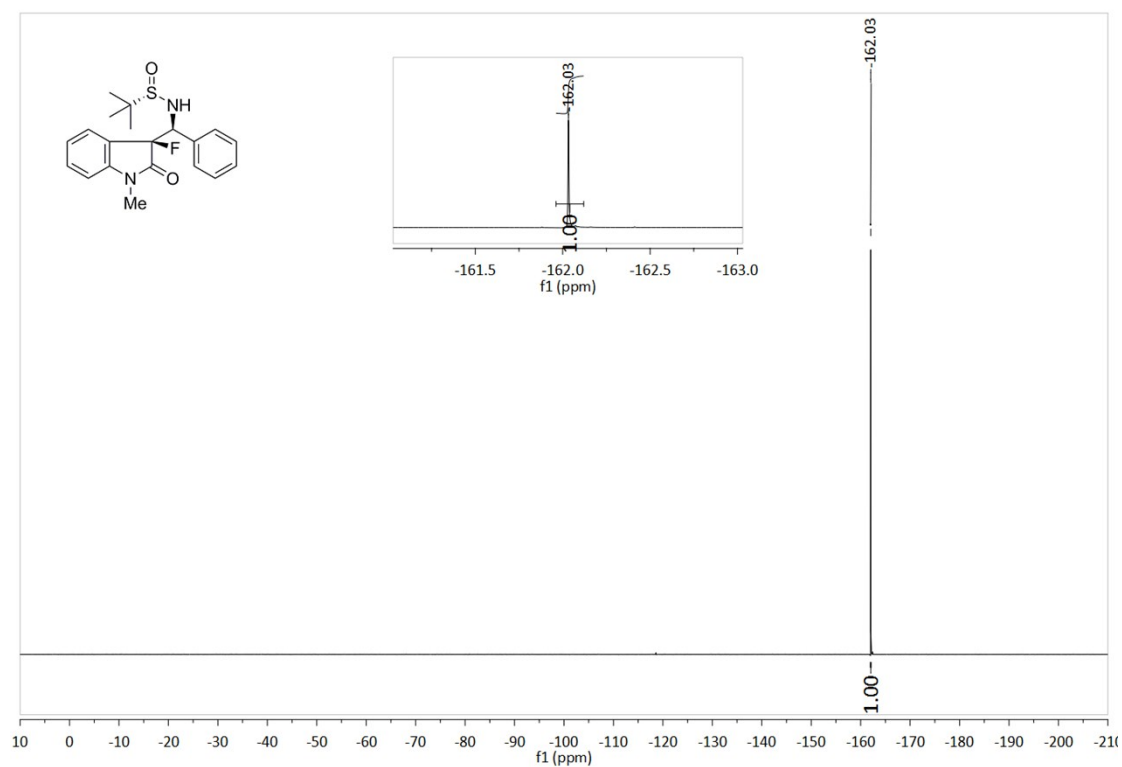

$^{19}\text{F}$  NMR spectrum of the crude reaction mixture

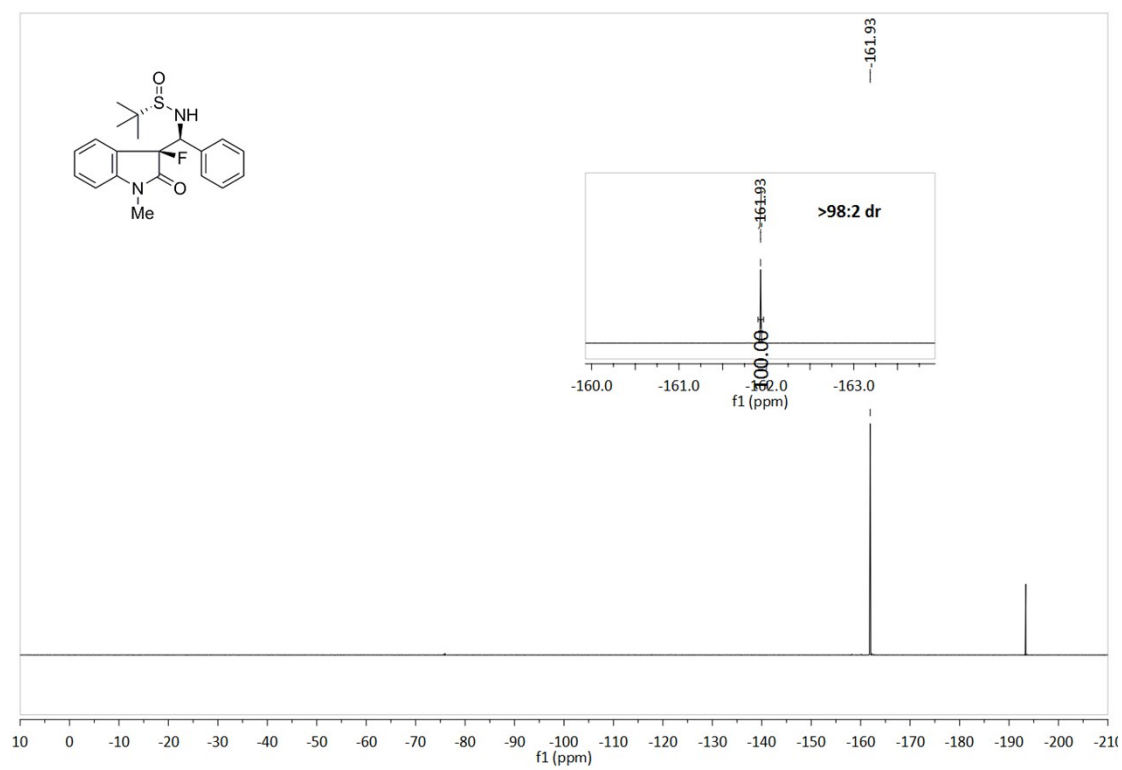

### <sup>1</sup>H NMR spectrum of **13a**

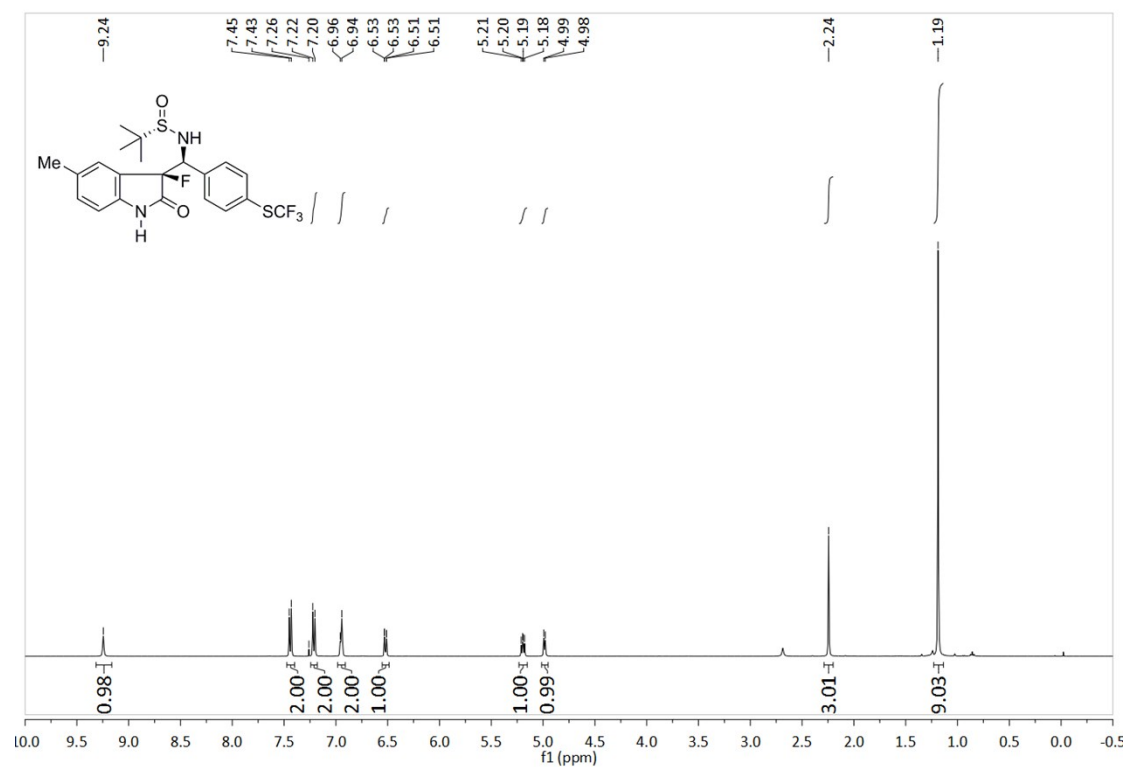

### <sup>13</sup>C NMR spectrum of **13a**

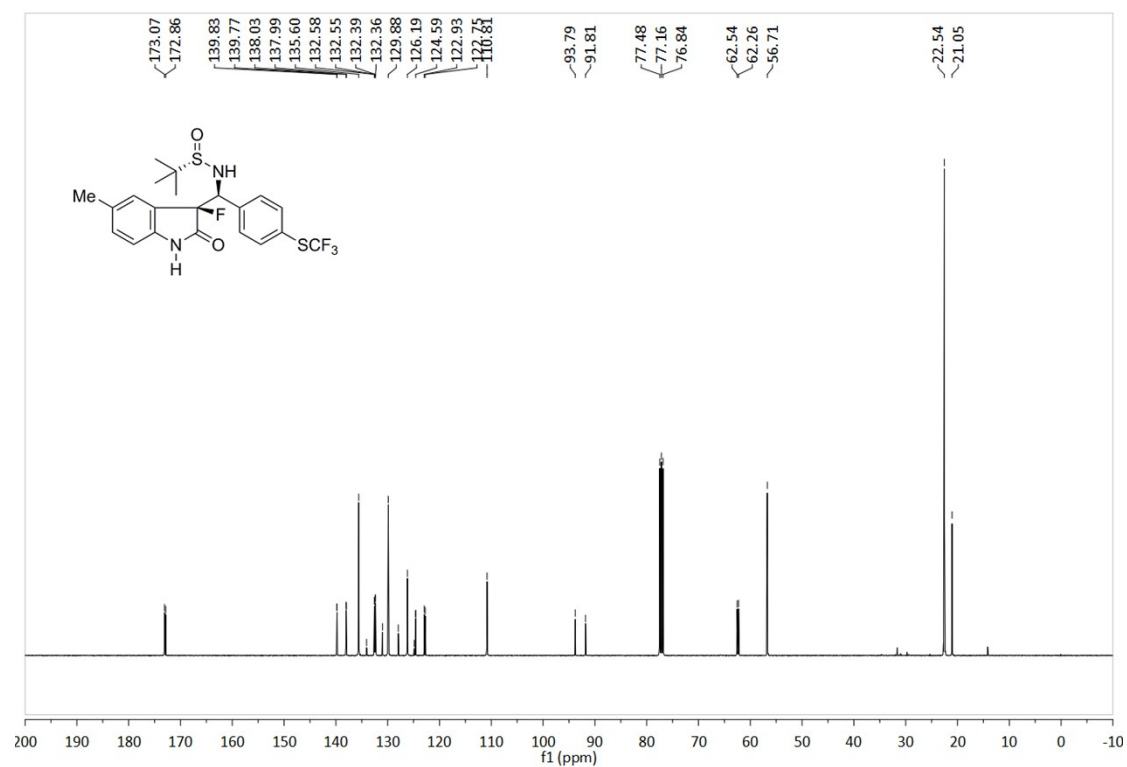

$^{19}\text{F}$  NMR spectrum of **13a**

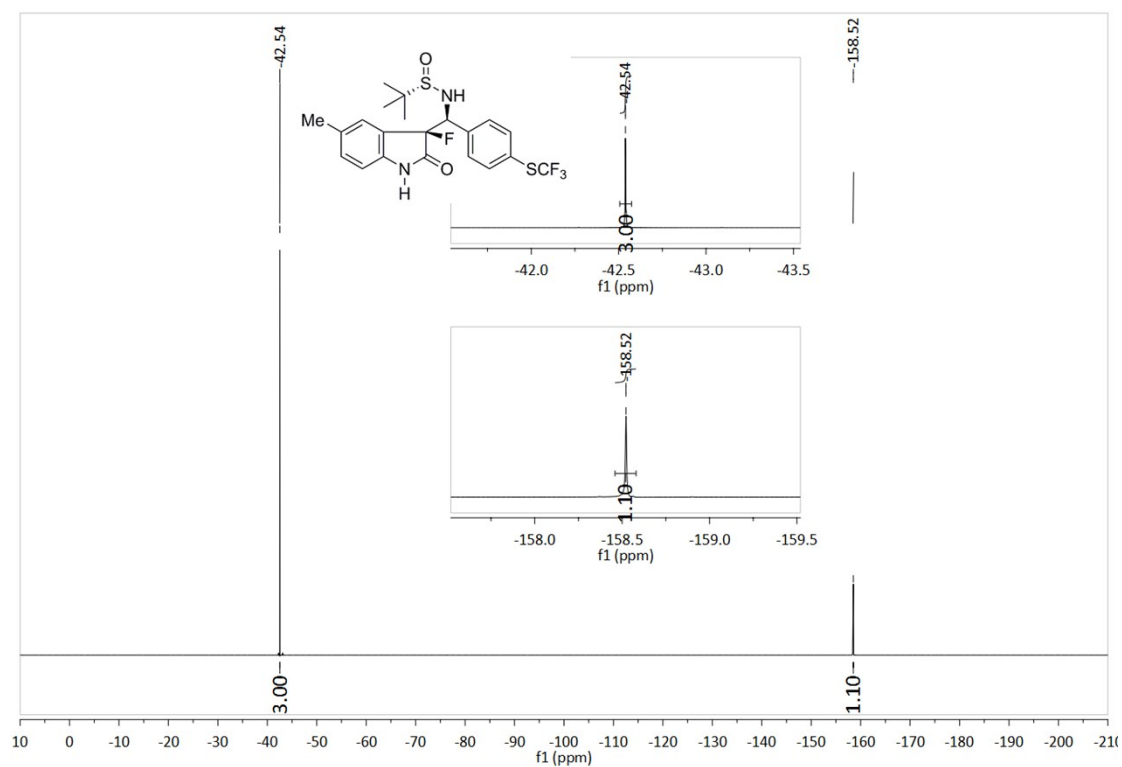

$^{19}\text{F}$  NMR spectrum of the crude reaction mixture

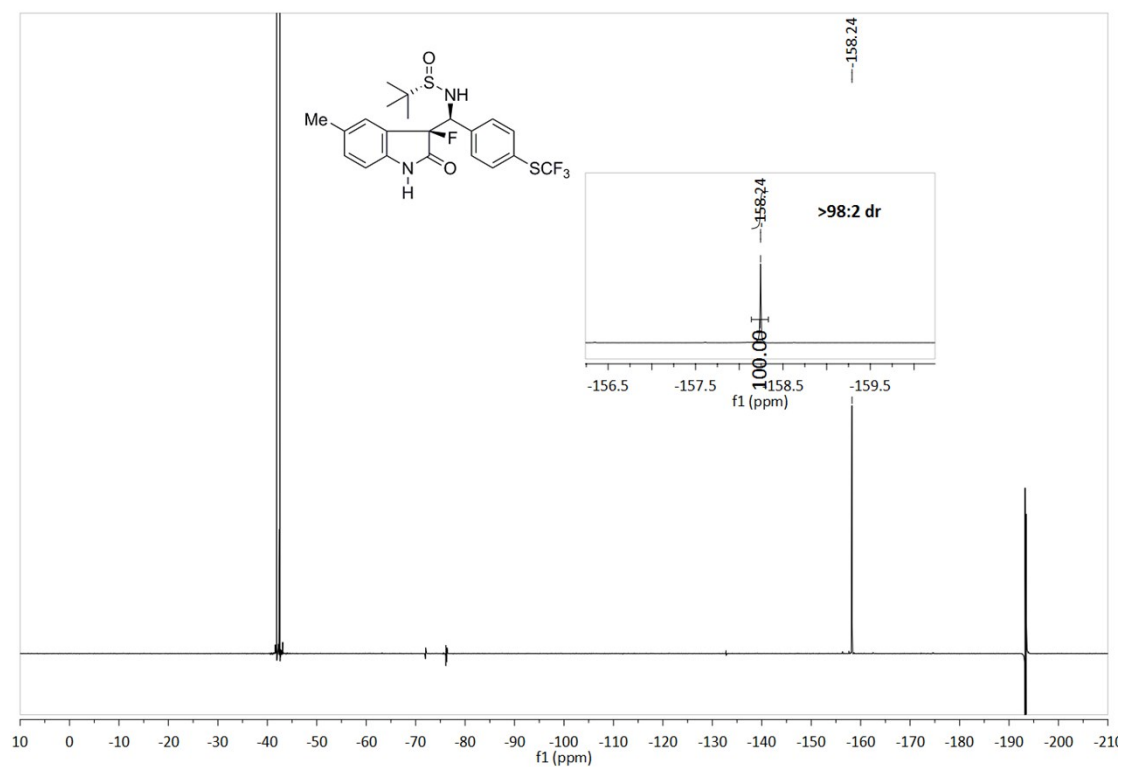



<sup>1</sup>H NMR spectrum of **13b**

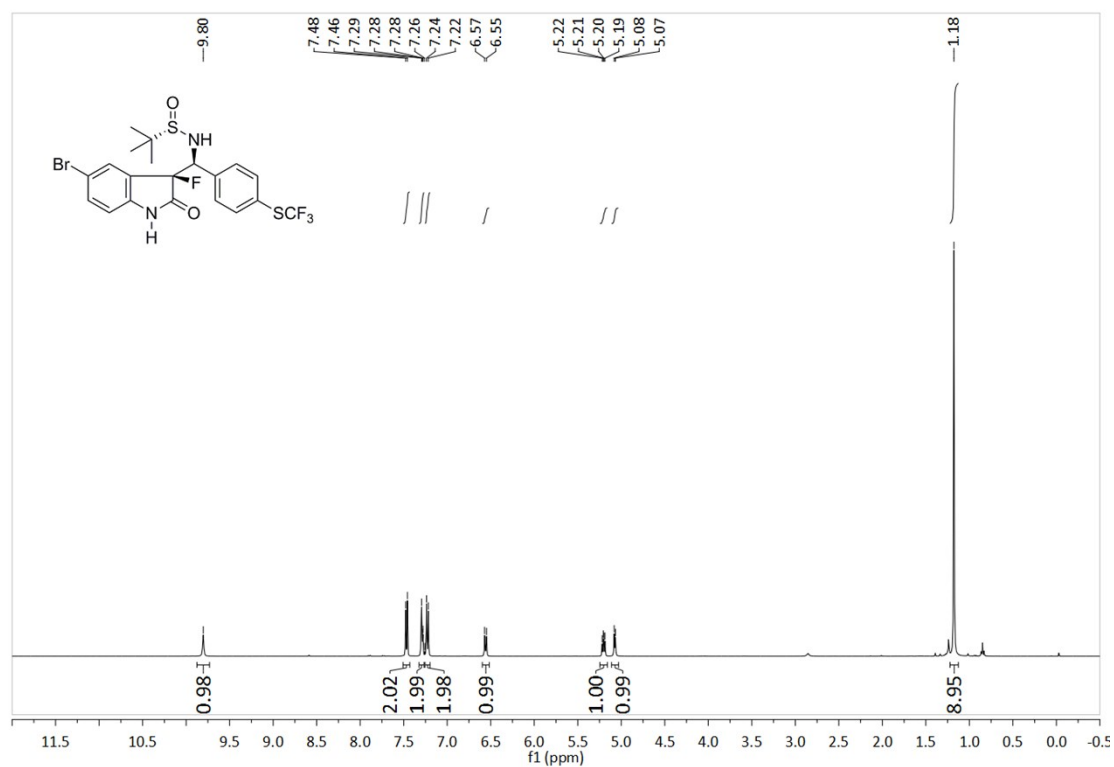

<sup>13</sup>C NMR spectrum of **13b**

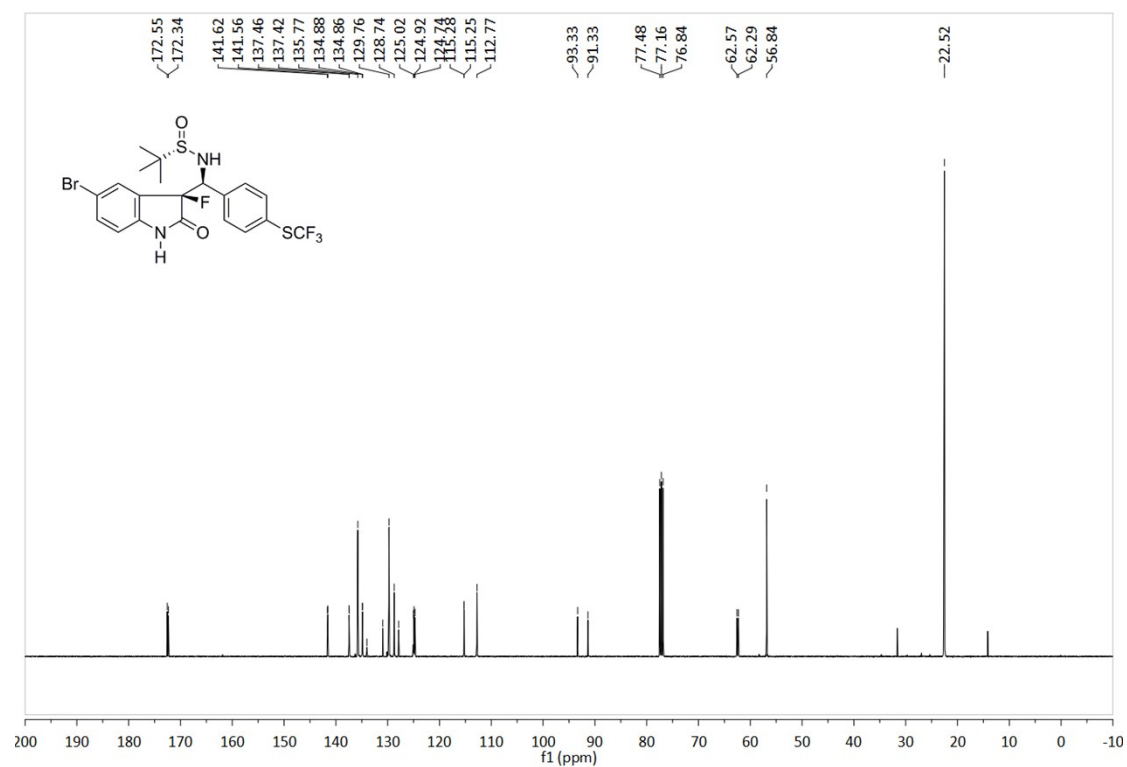

<sup>19</sup>F NMR spectrum of **13b**

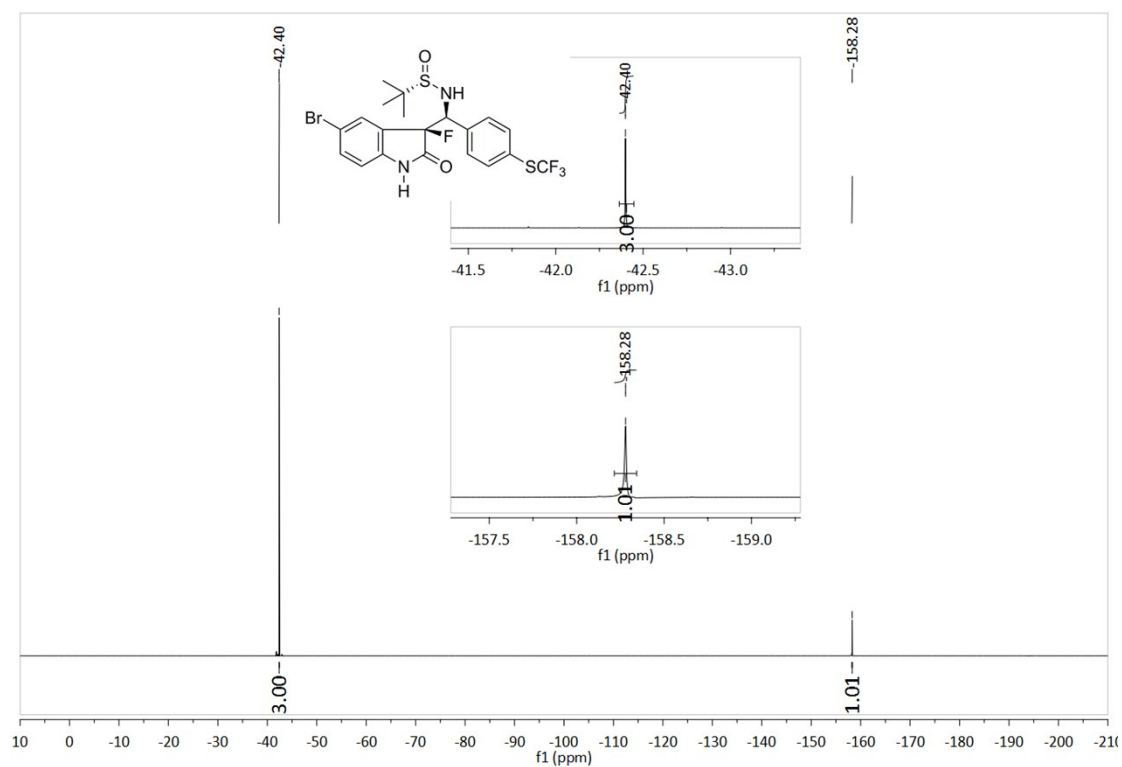

<sup>19</sup>F NMR spectrum of the crude reaction mixture

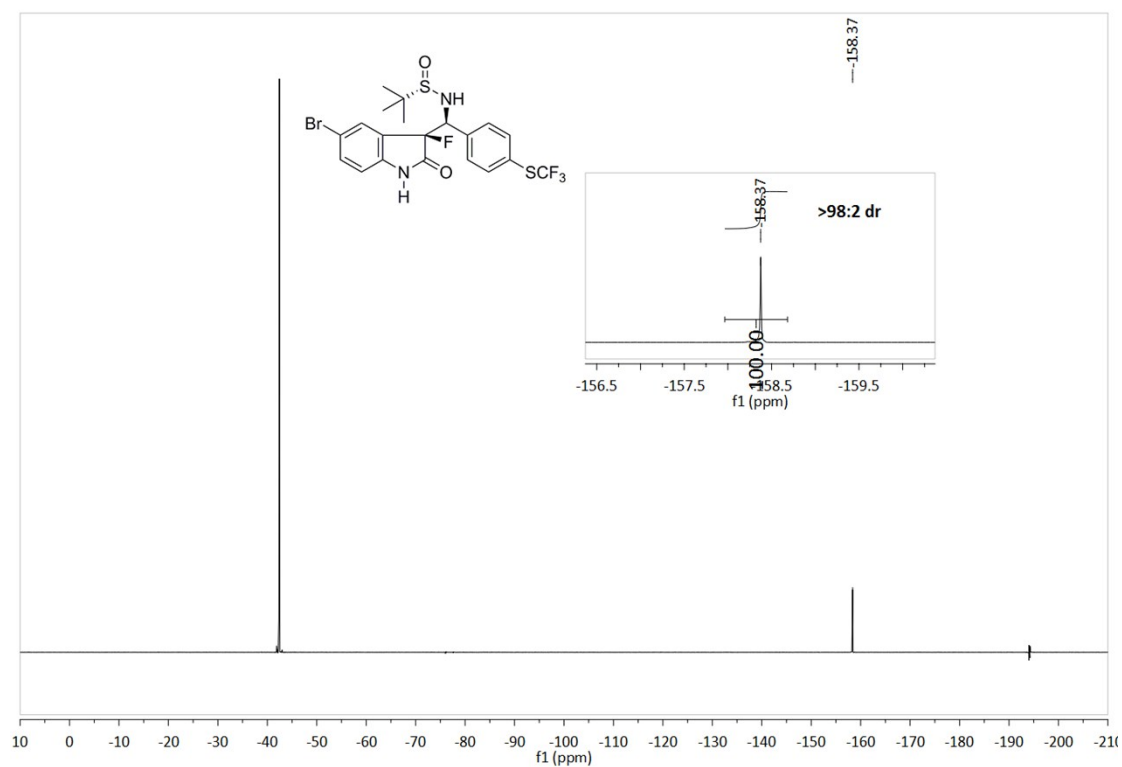

<sup>1</sup>H NMR spectrum of **13c**

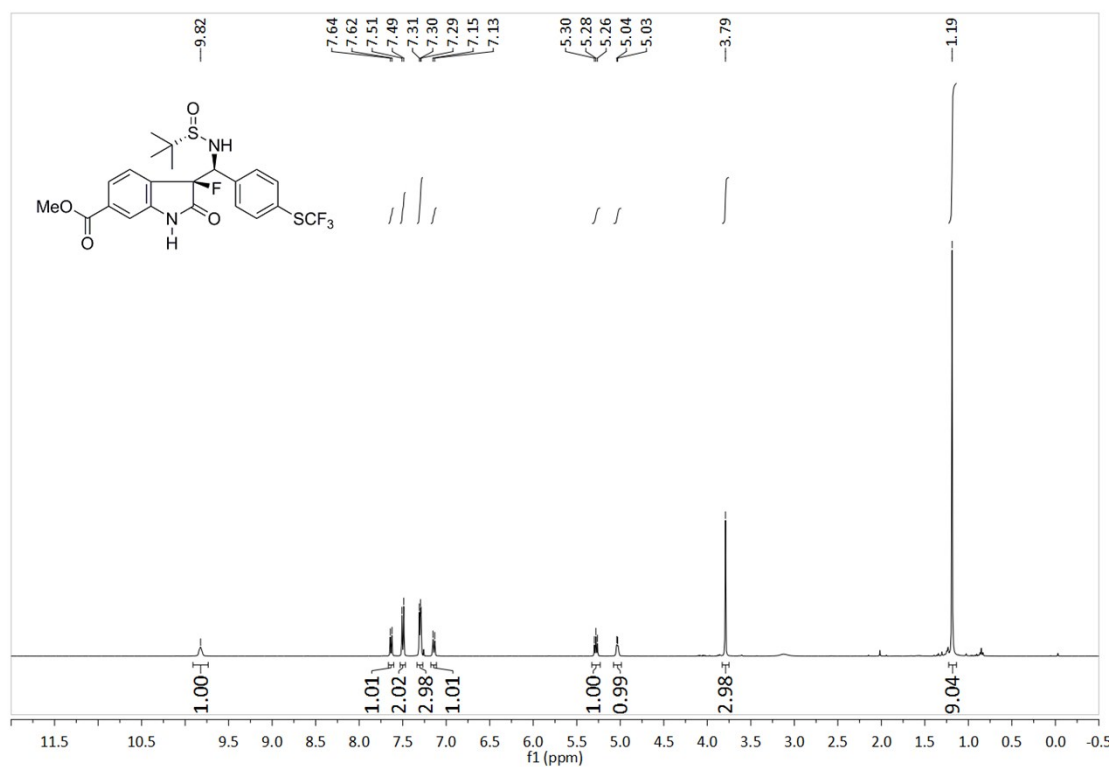

<sup>13</sup>C NMR spectrum of **13c**

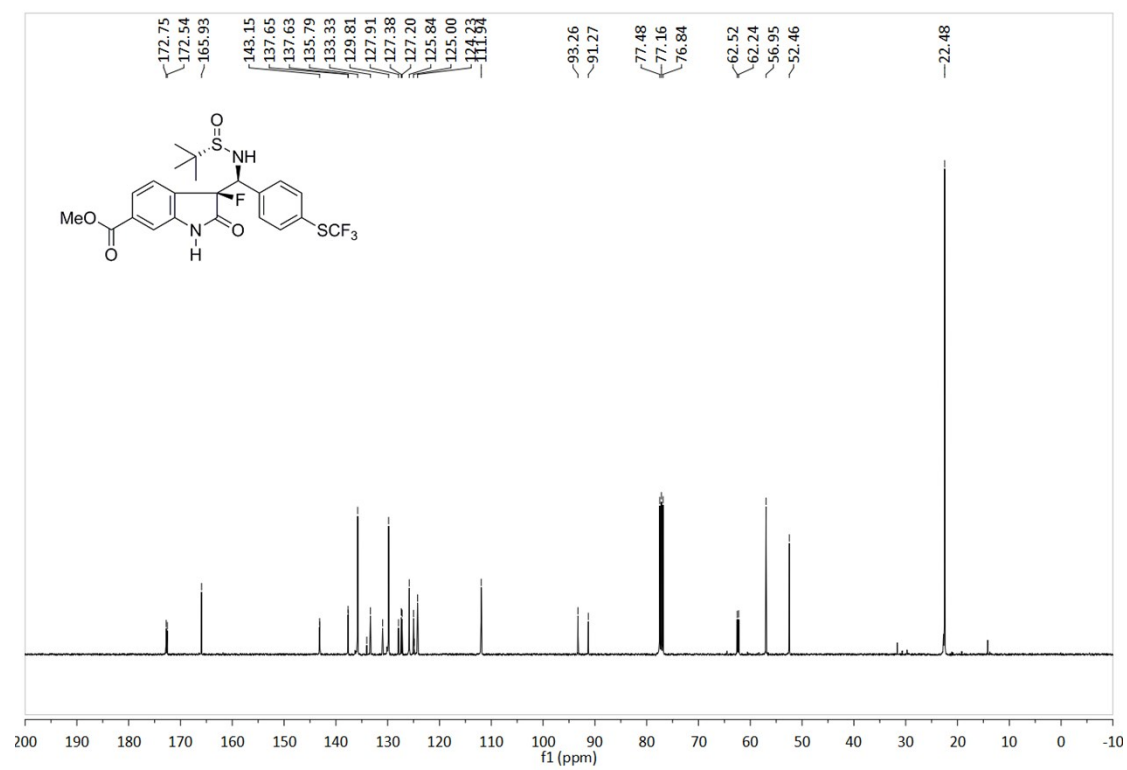

$^{19}\text{F}$  NMR spectrum of **13c**

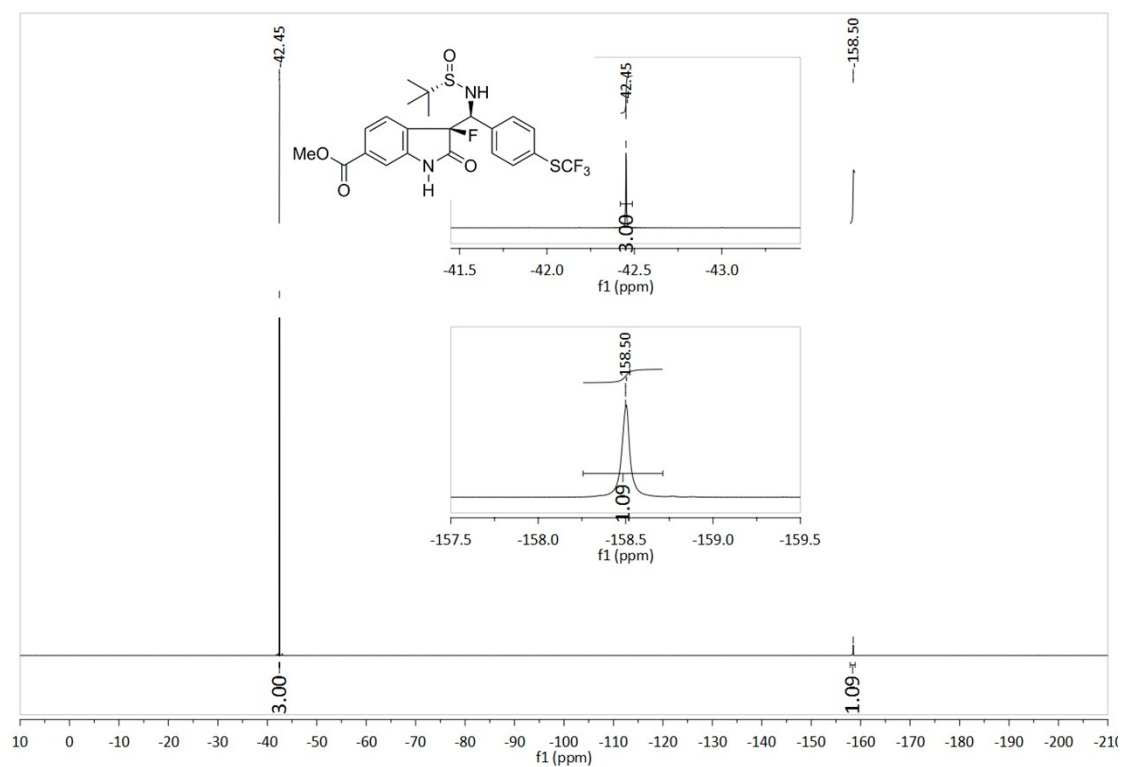

$^{19}\text{F}$  NMR spectrum of the crude reaction mixture

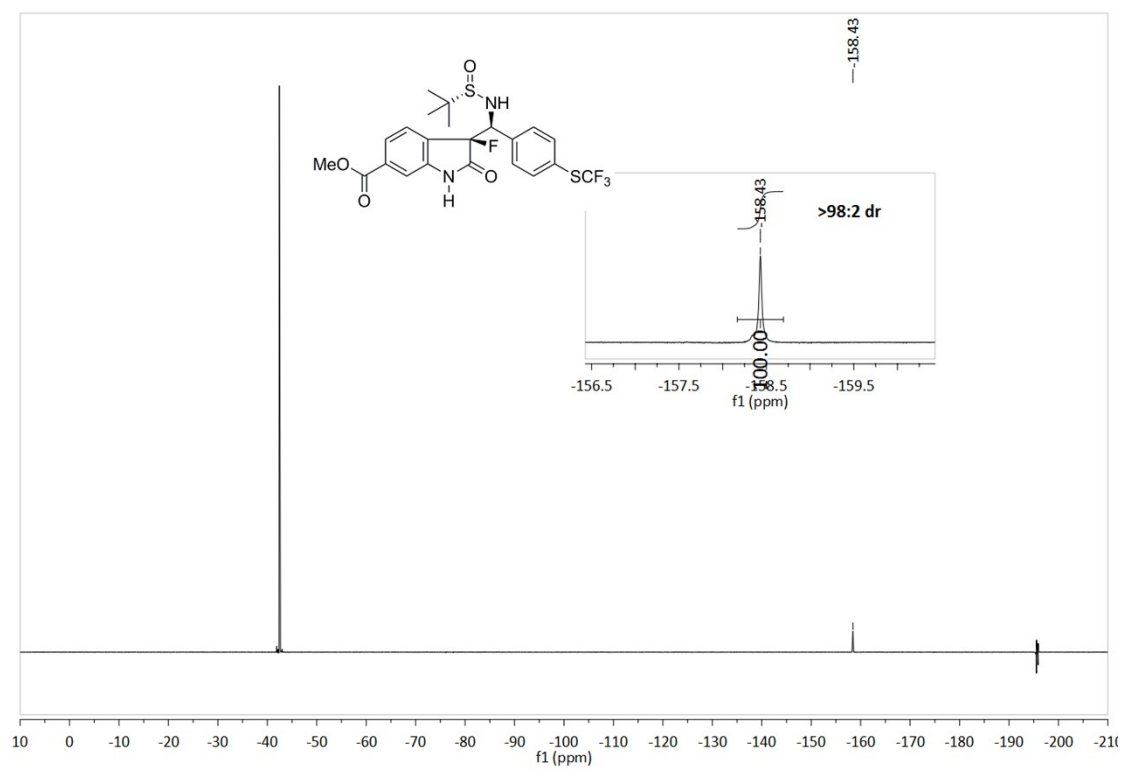

<sup>1</sup>H NMR spectrum of **13d**

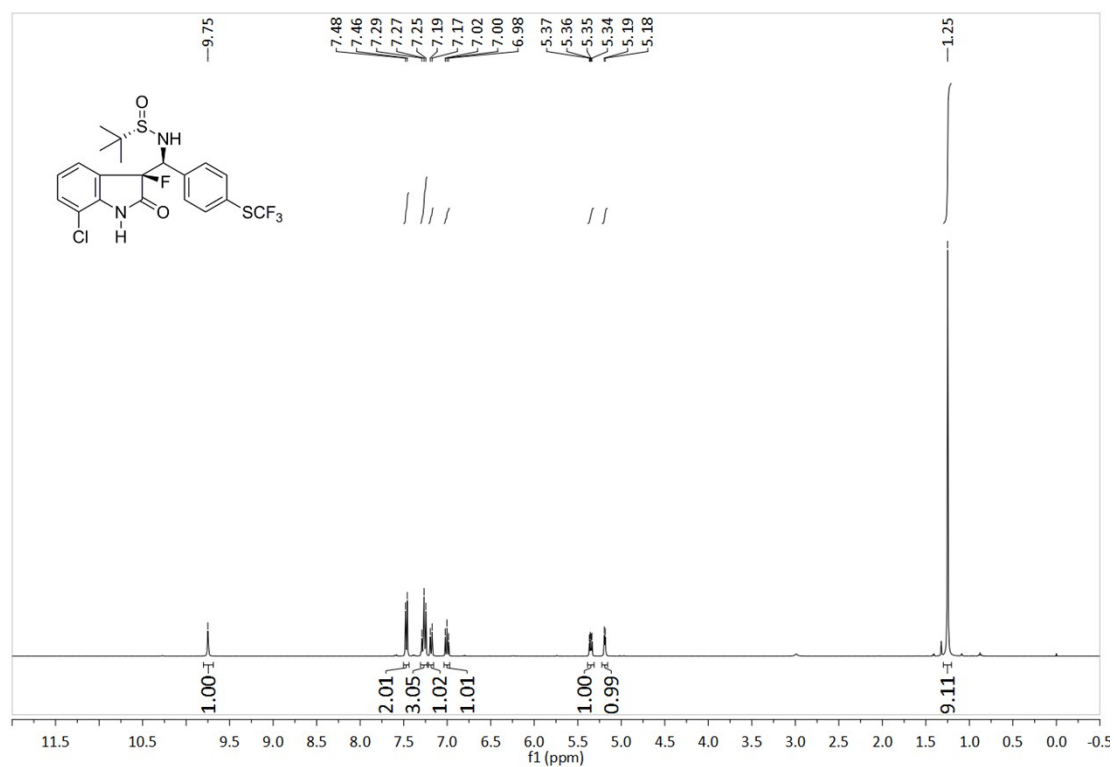

<sup>13</sup>C NMR spectrum of **13d**

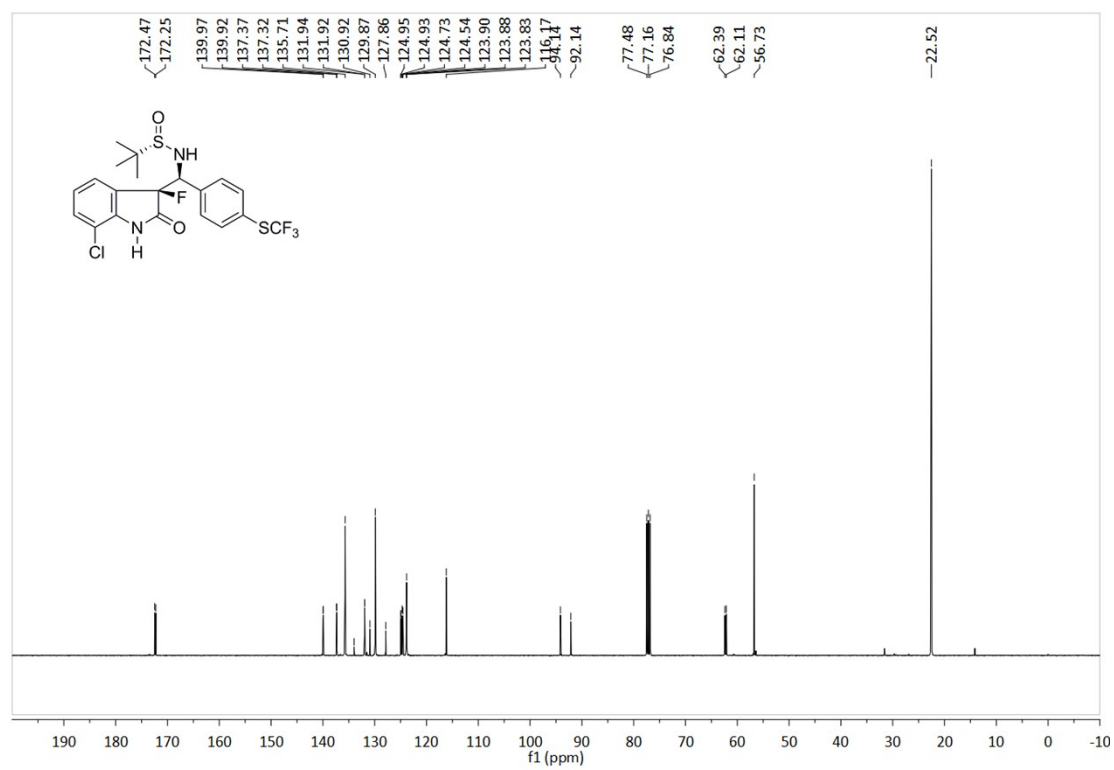

<sup>19</sup>F NMR spectrum of **13d**

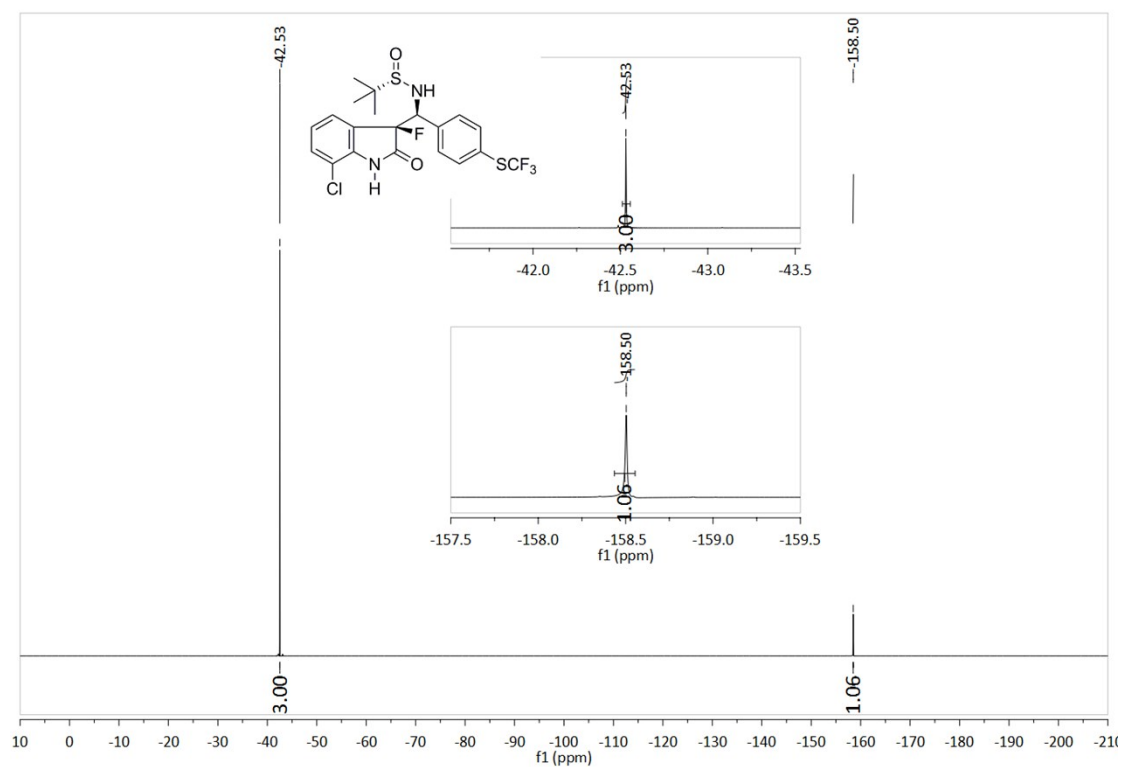

<sup>19</sup>F NMR spectrum of the crude reaction mixture

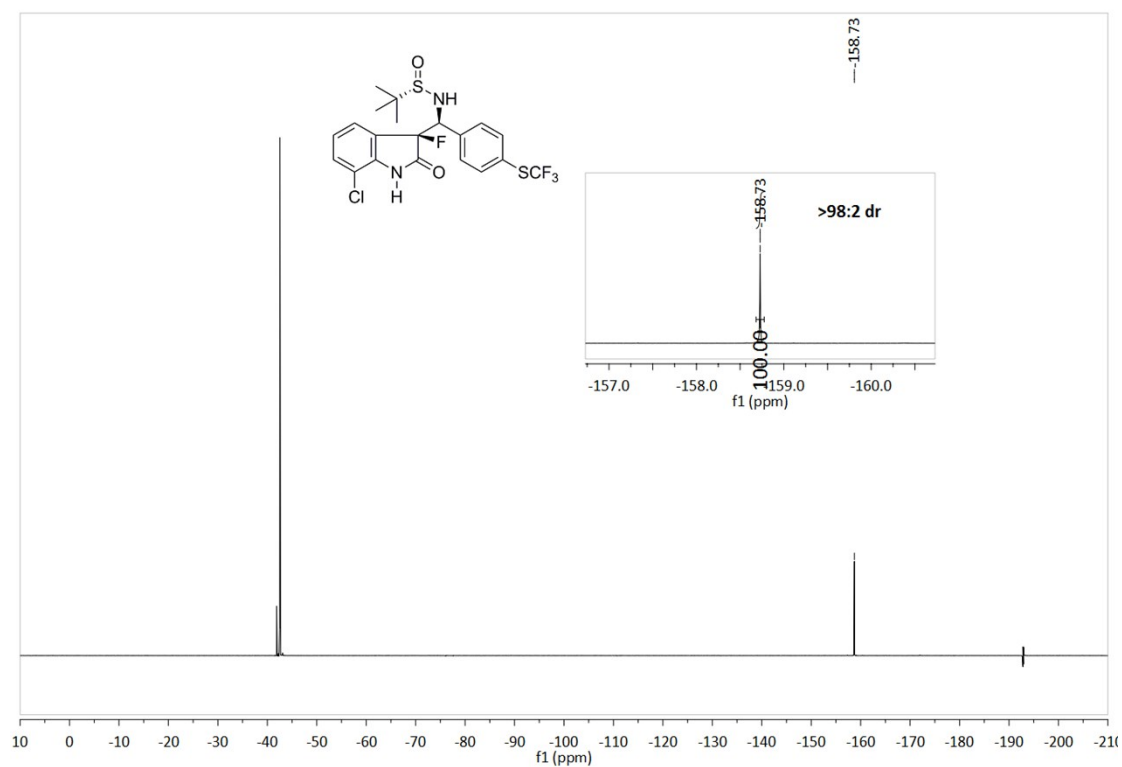

<sup>1</sup>H NMR spectrum of **13e**

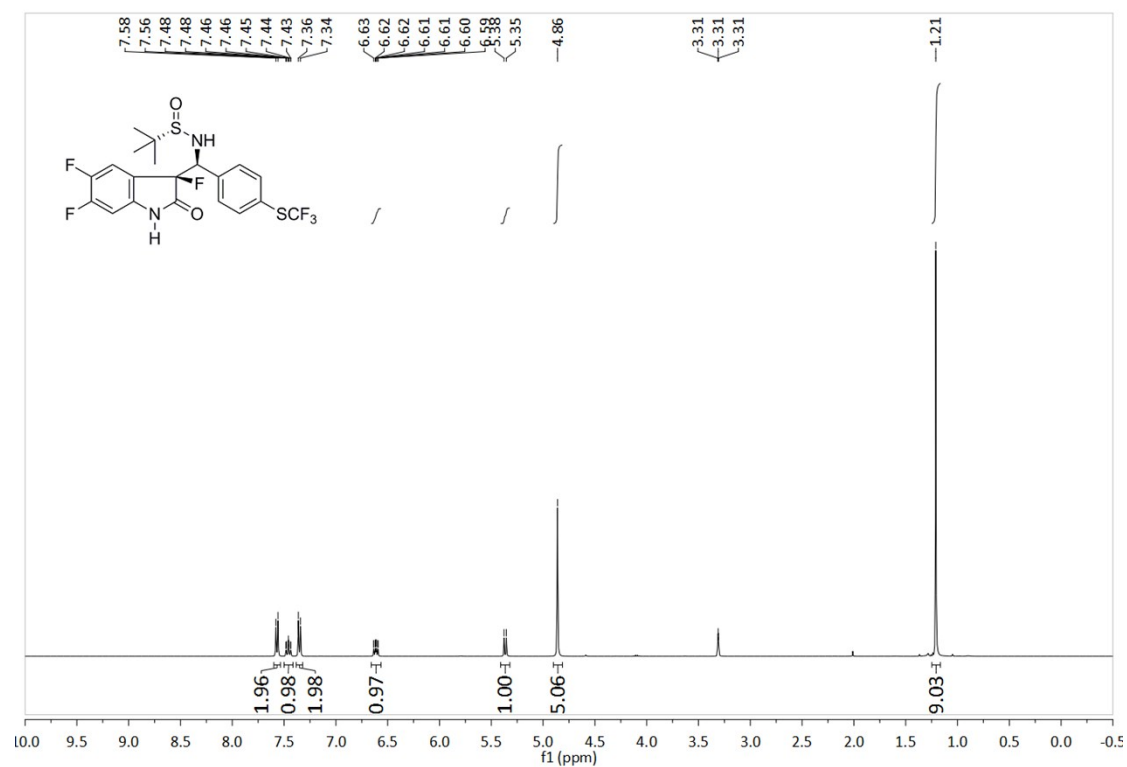

<sup>13</sup>C NMR spectrum of **13e**

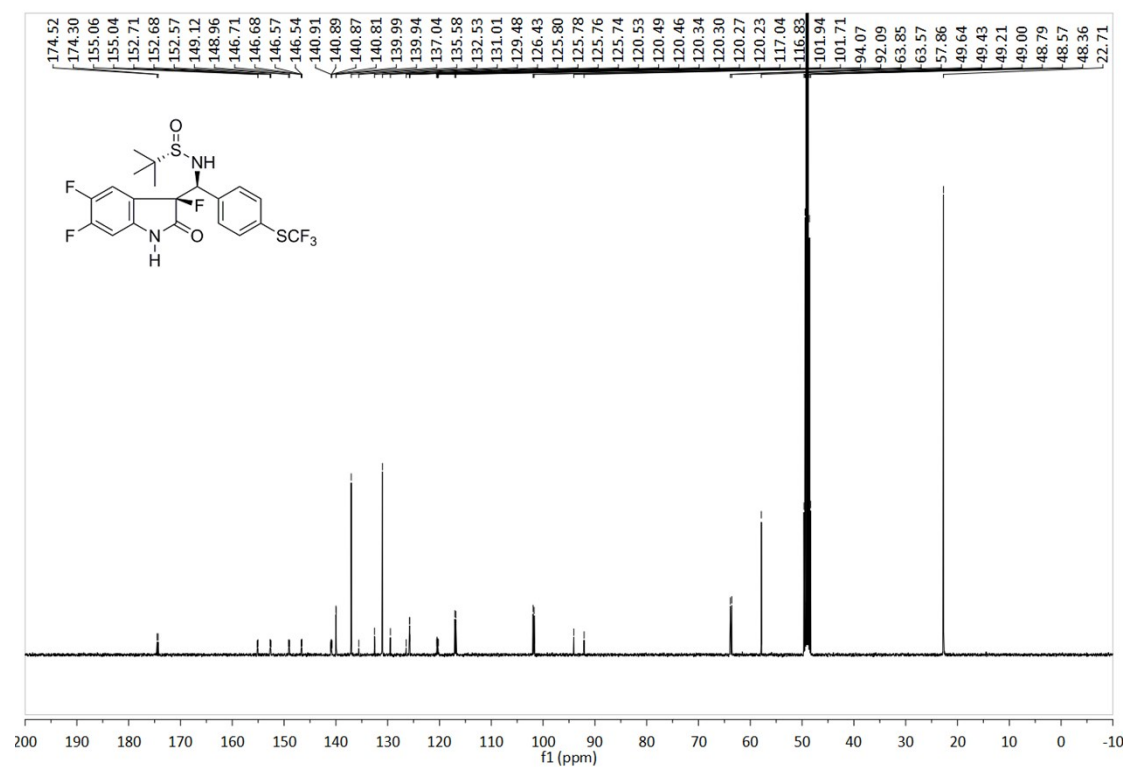

<sup>19</sup>F NMR spectrum of **13e**

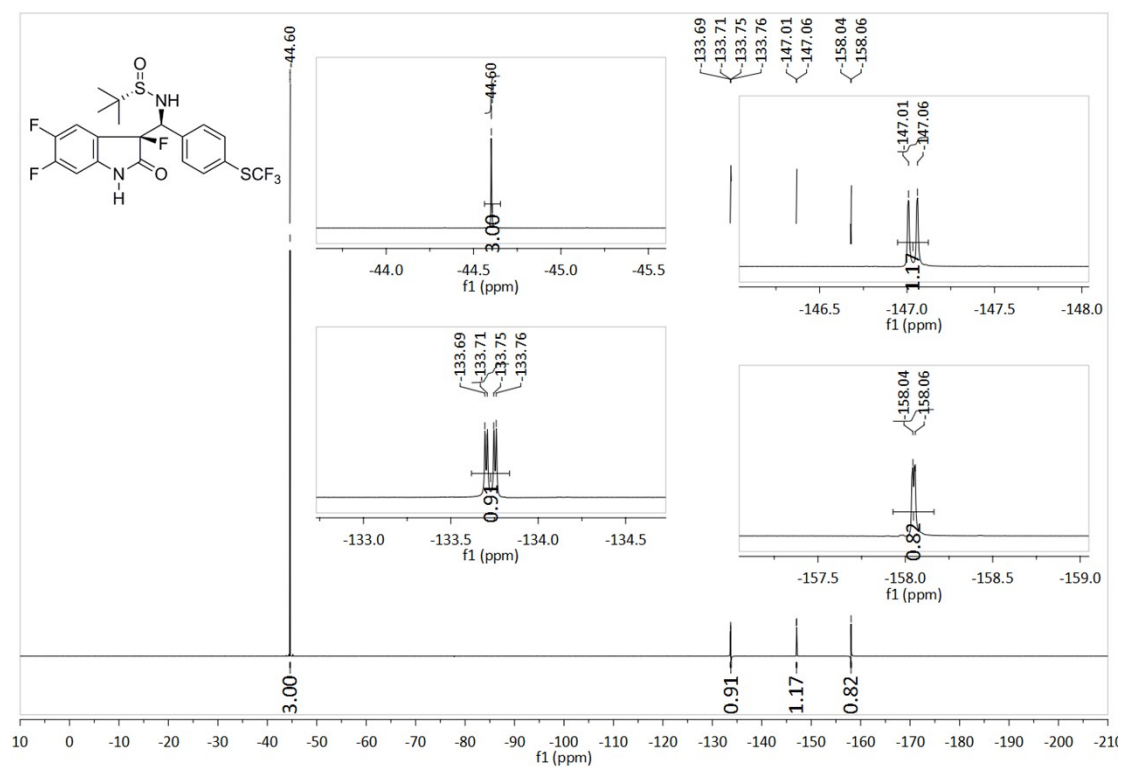

<sup>19</sup>F NMR spectrum of the crude reaction mixture

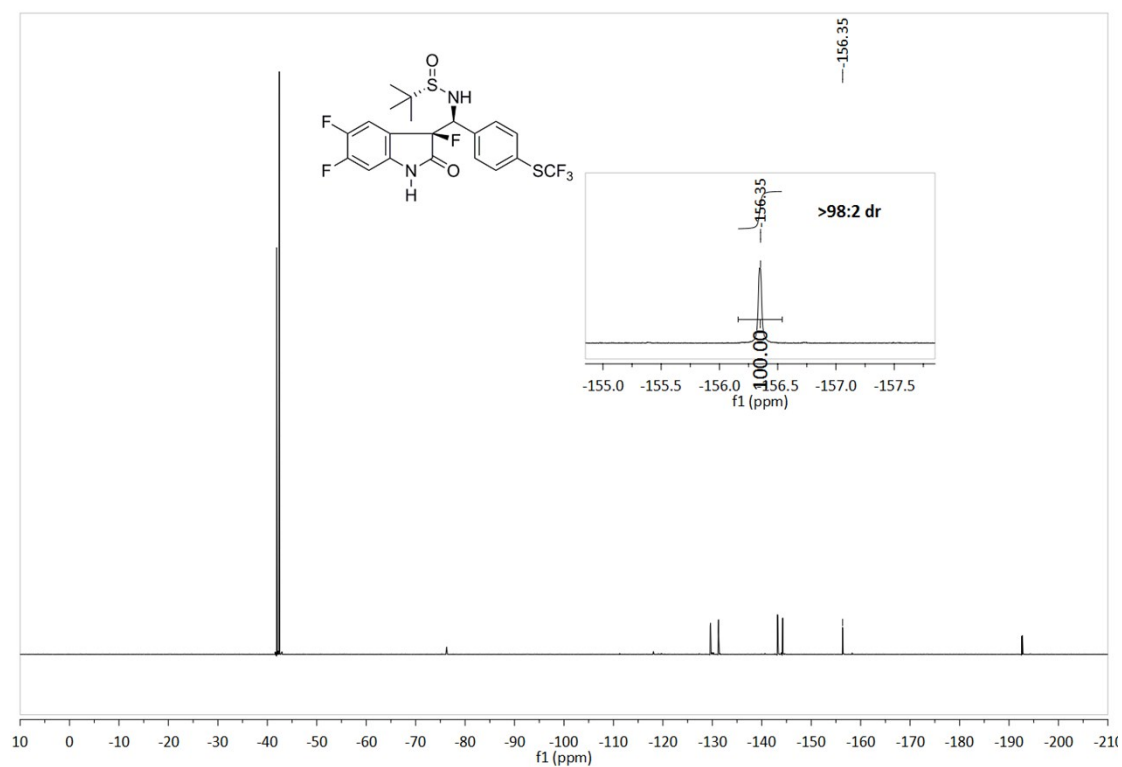



<sup>1</sup>H NMR spectrum of **13f**

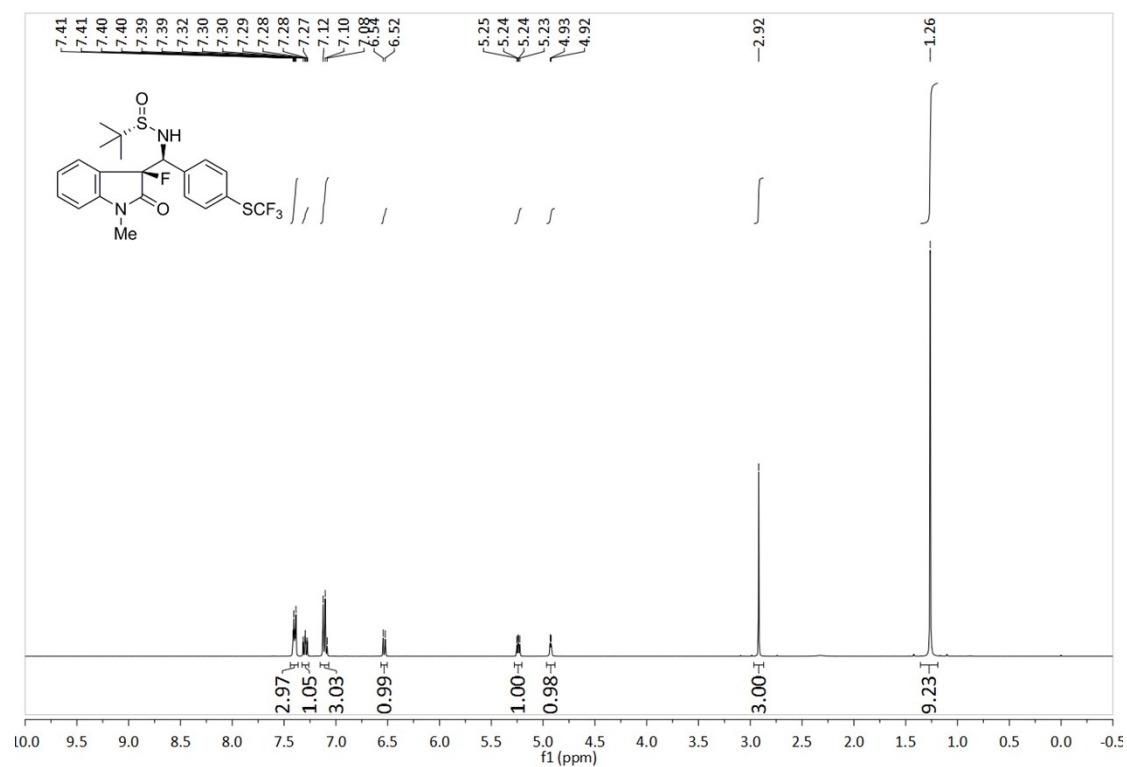

<sup>13</sup>C NMR spectrum of **13f**

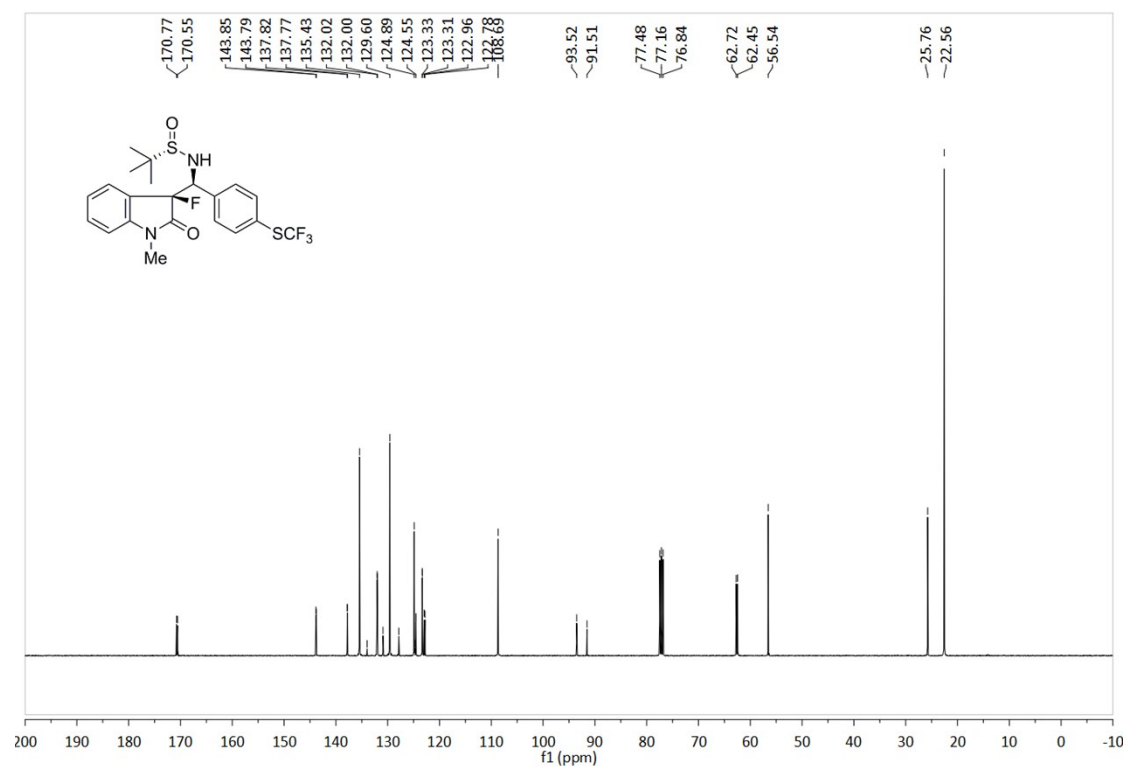

<sup>19</sup>F NMR spectrum of **13f**

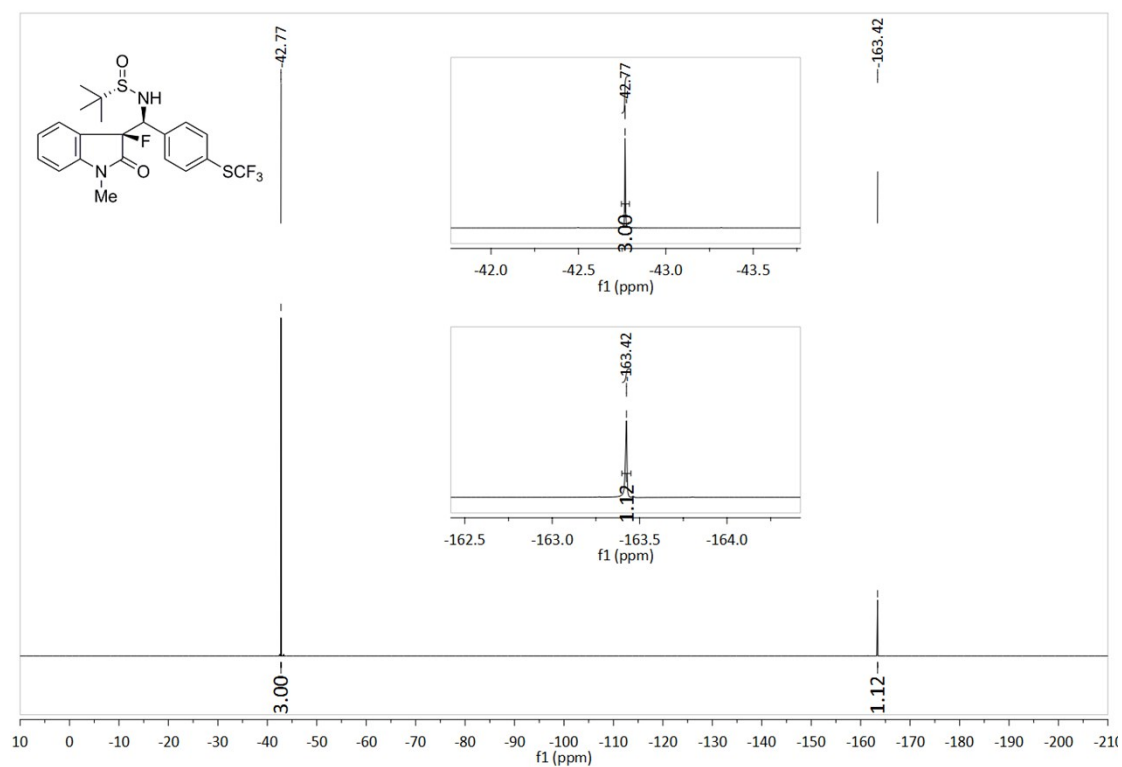

<sup>19</sup>F NMR spectrum of the crude reaction mixture

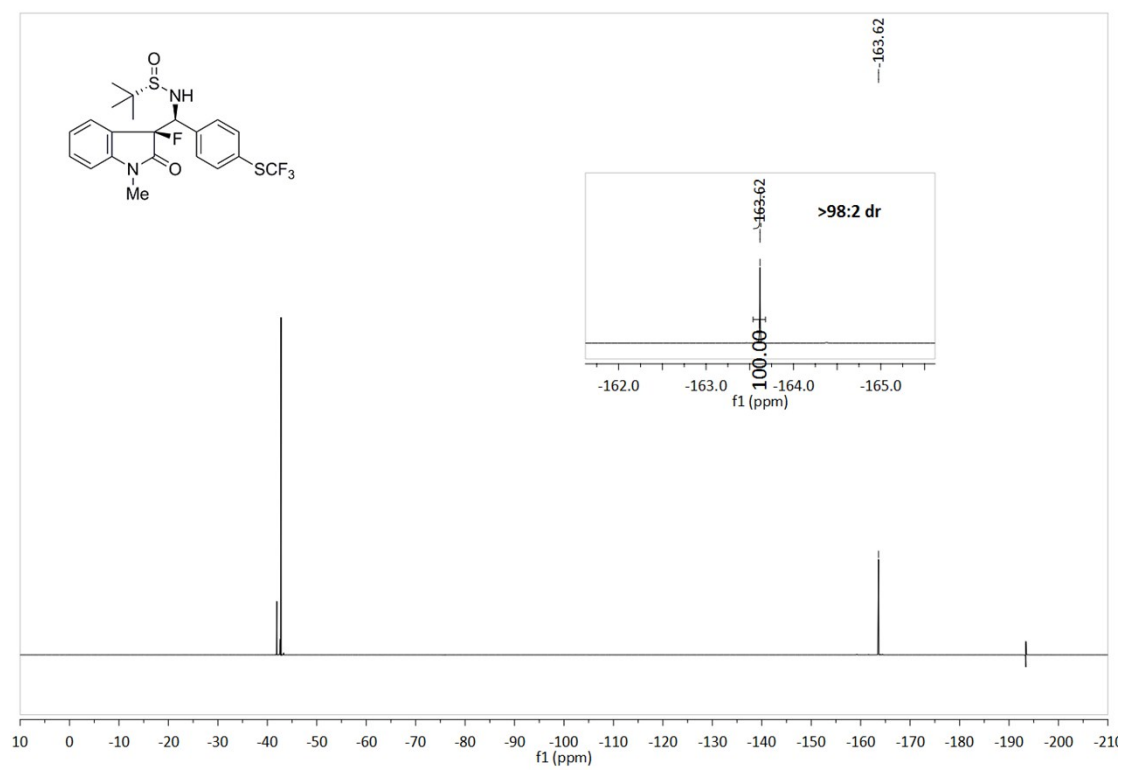

<sup>1</sup>H NMR spectrum of **13g**

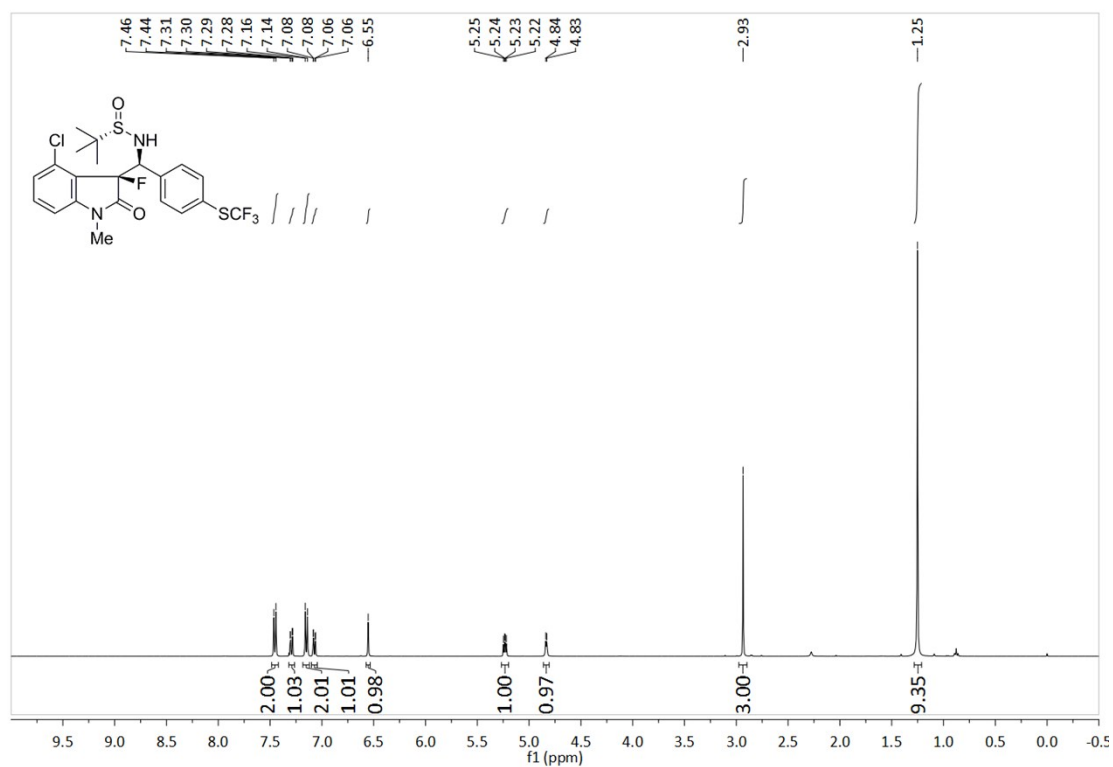

<sup>13</sup>C NMR spectrum of **13g**

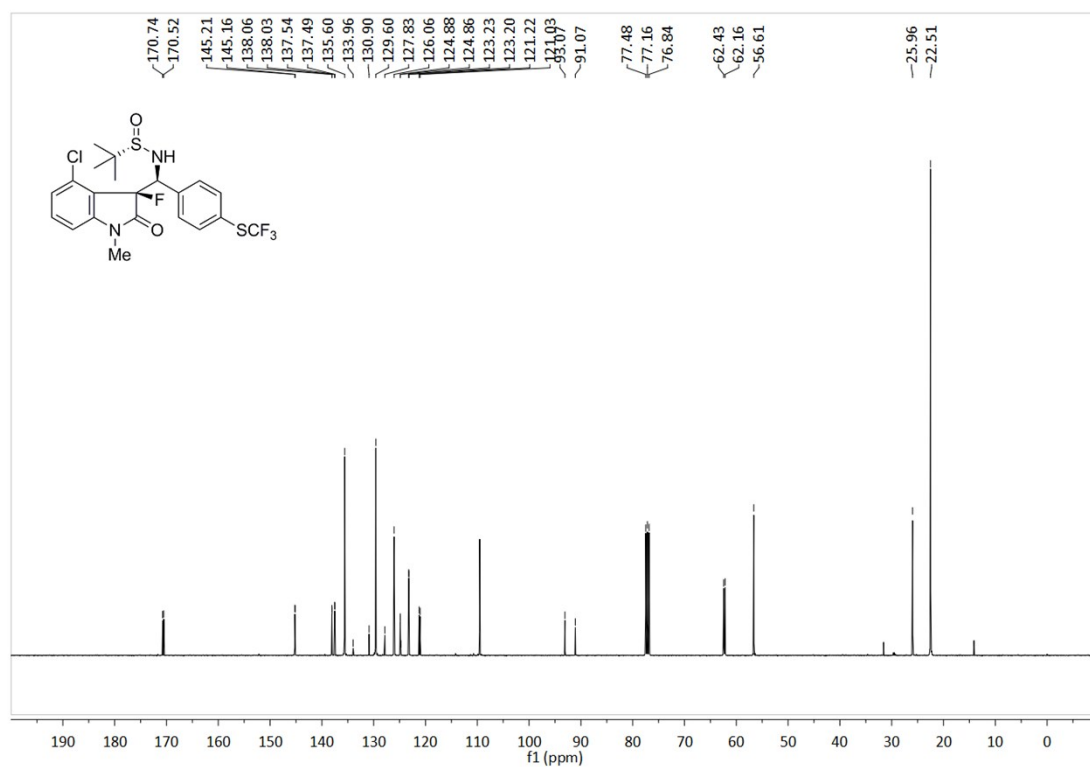

<sup>19</sup>F NMR spectrum of **13g**

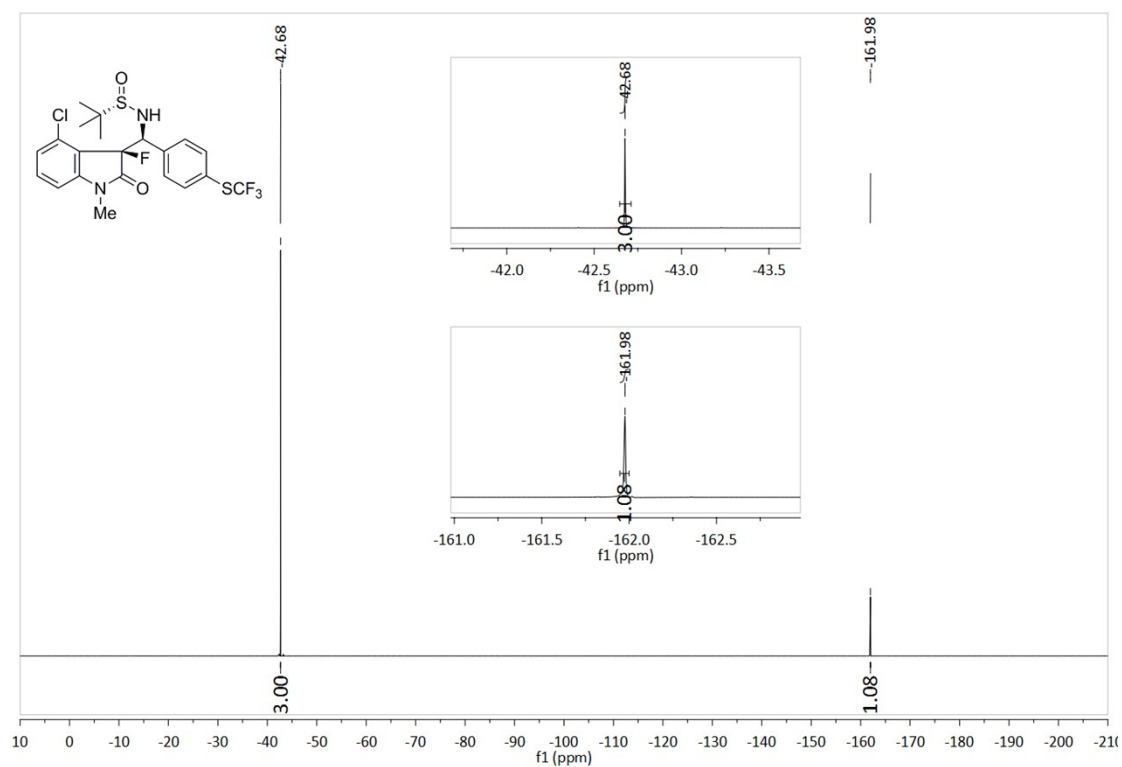

<sup>19</sup>F NMR spectrum of the crude reaction mixture

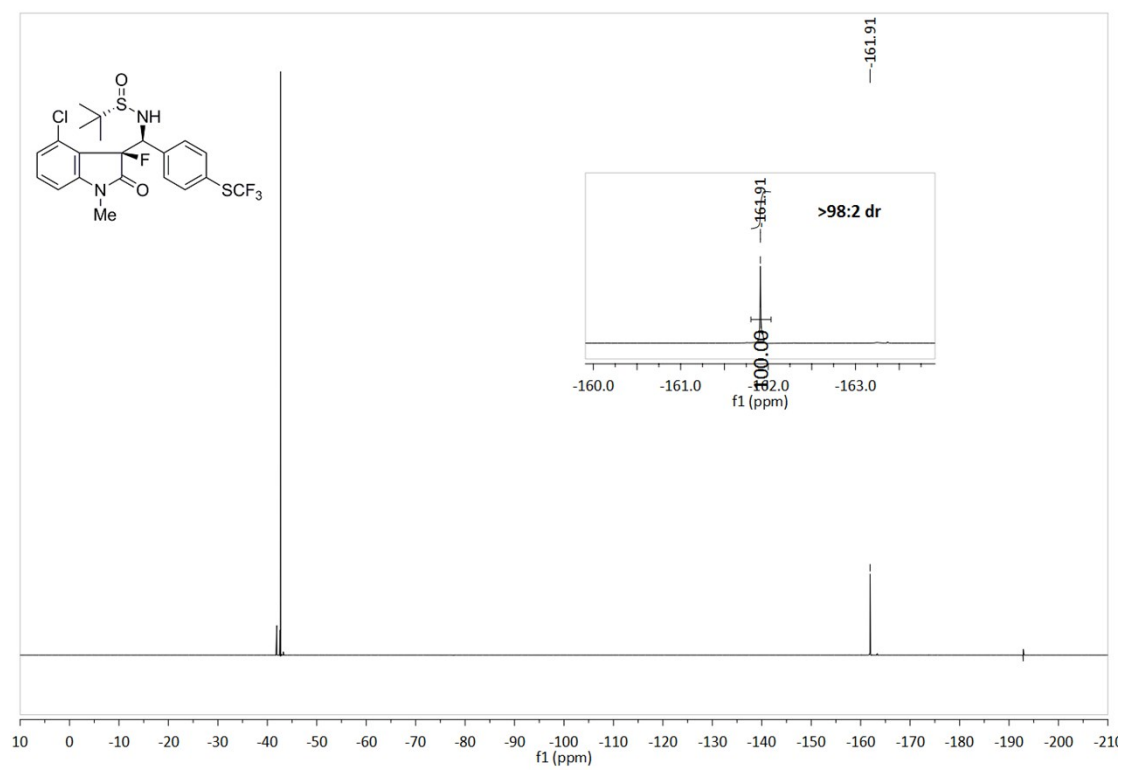



<sup>19</sup>F NMR spectrum of **13h**

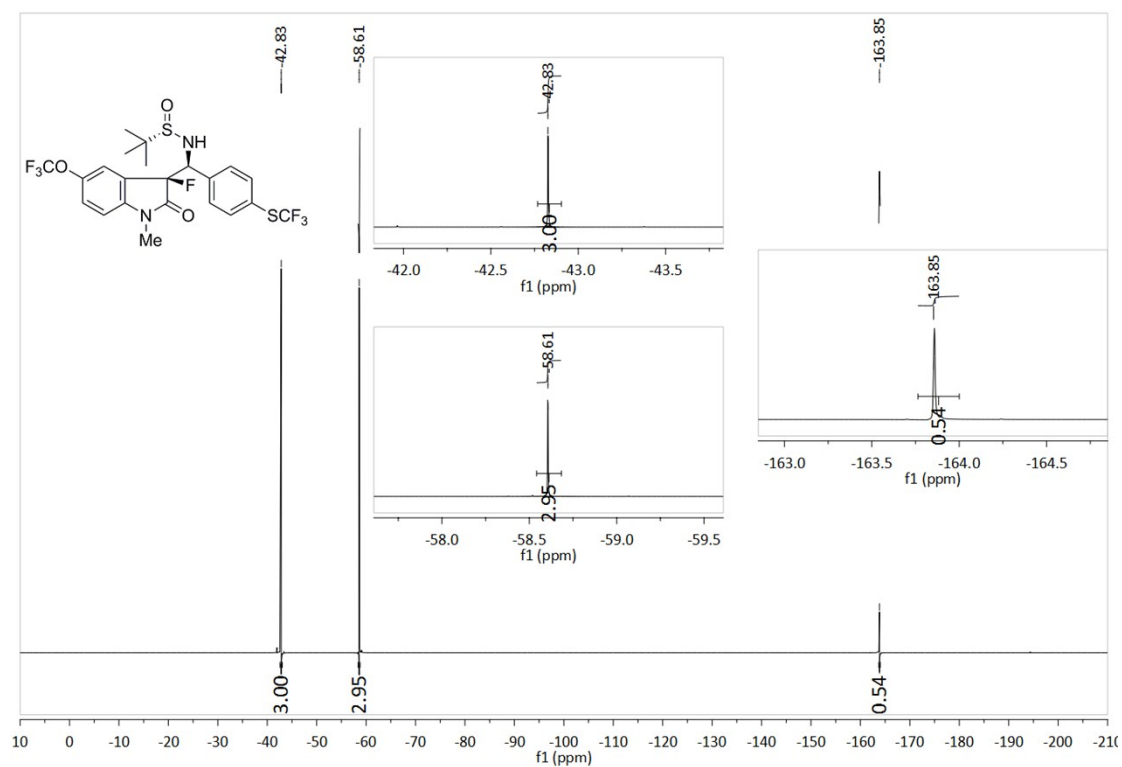

<sup>19</sup>F NMR spectrum of the crude reaction mixture

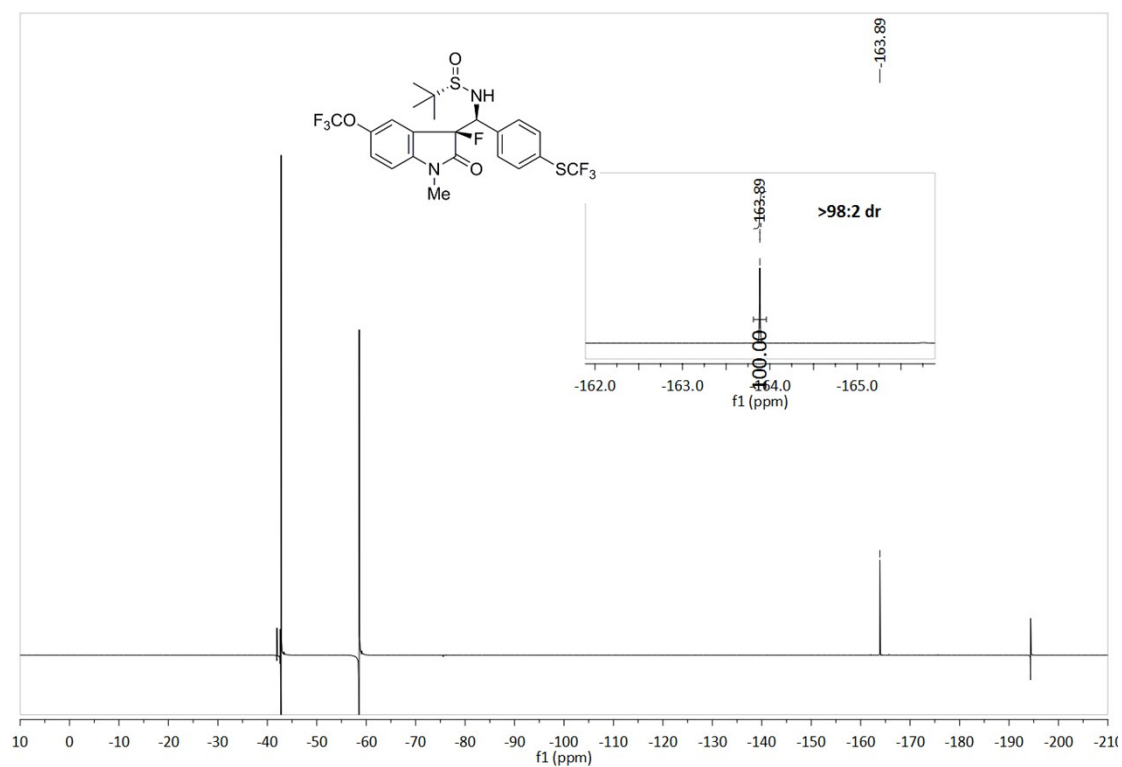

<sup>1</sup>H NMR spectrum of **13i**

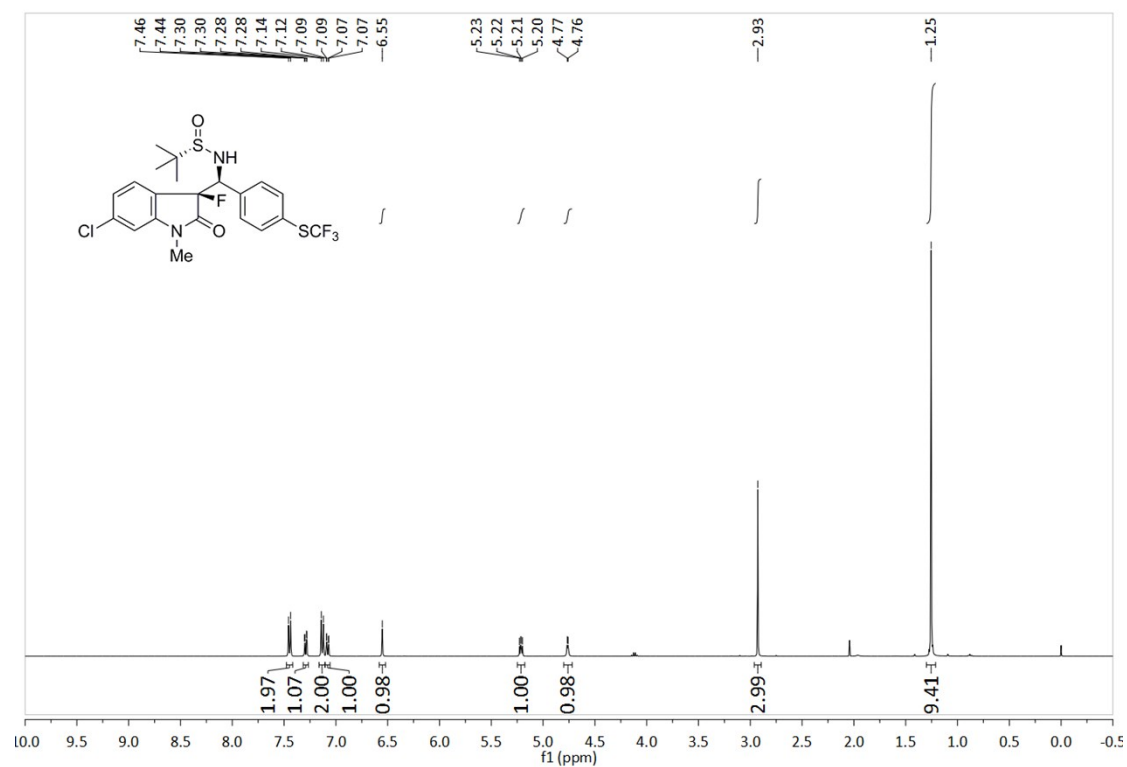

<sup>13</sup>C NMR spectrum of **13i**

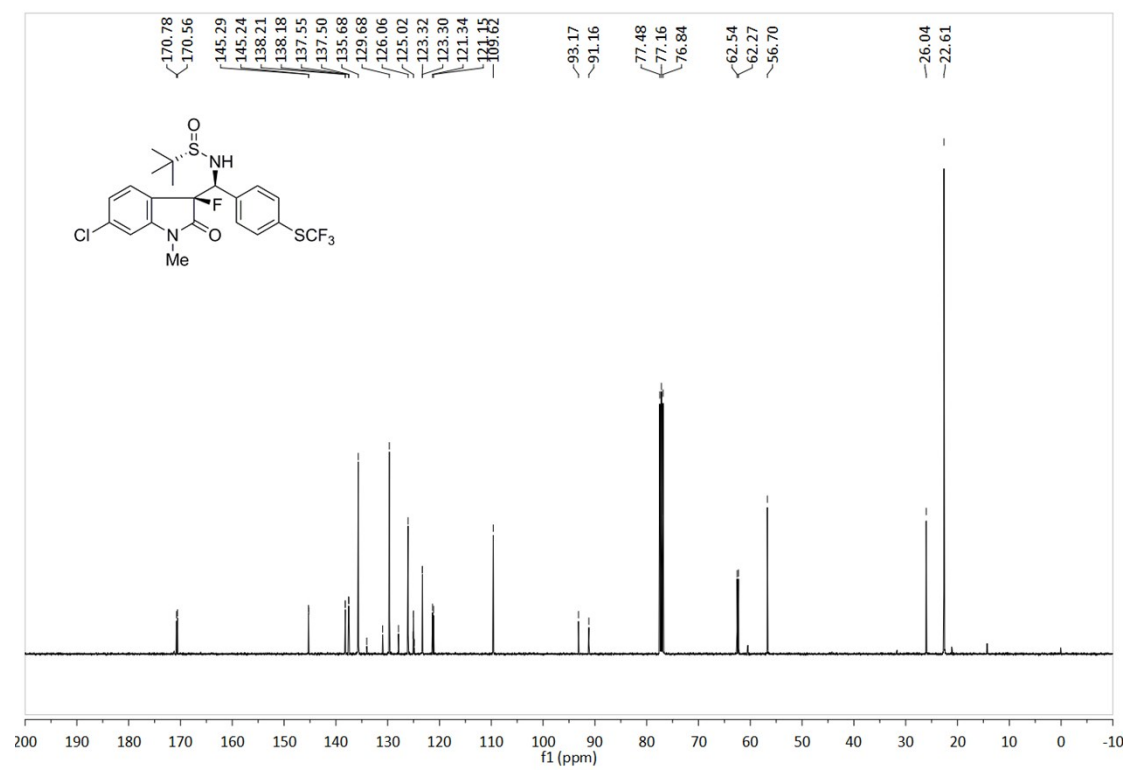

$^{19}\text{F}$  NMR spectrum of **13i**

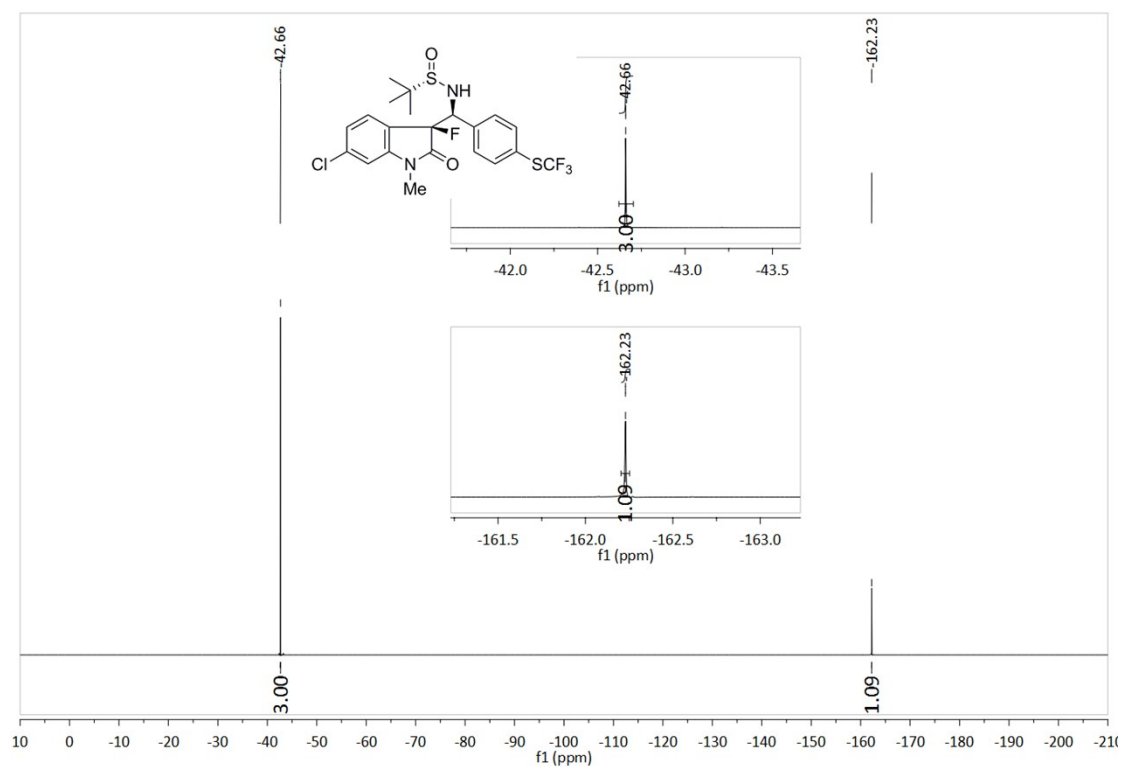

$^{19}\text{F}$  NMR spectrum of the crude reaction mixture

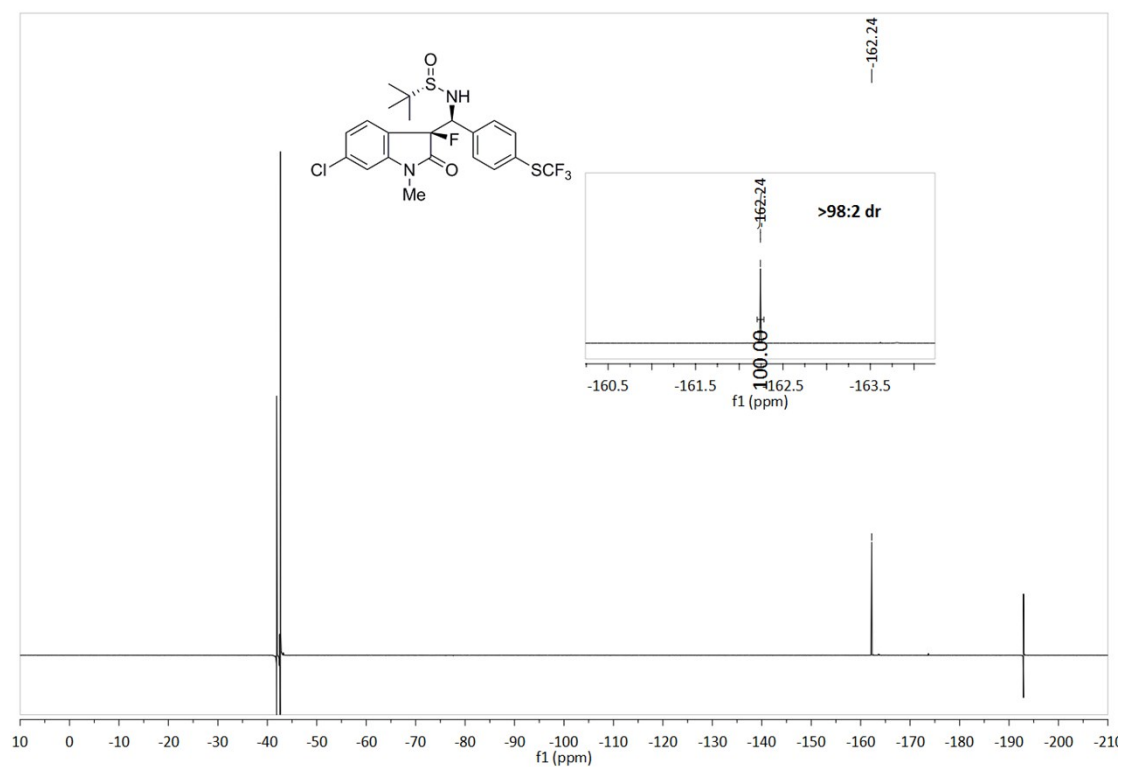



<sup>1</sup>H NMR spectrum of **13j**

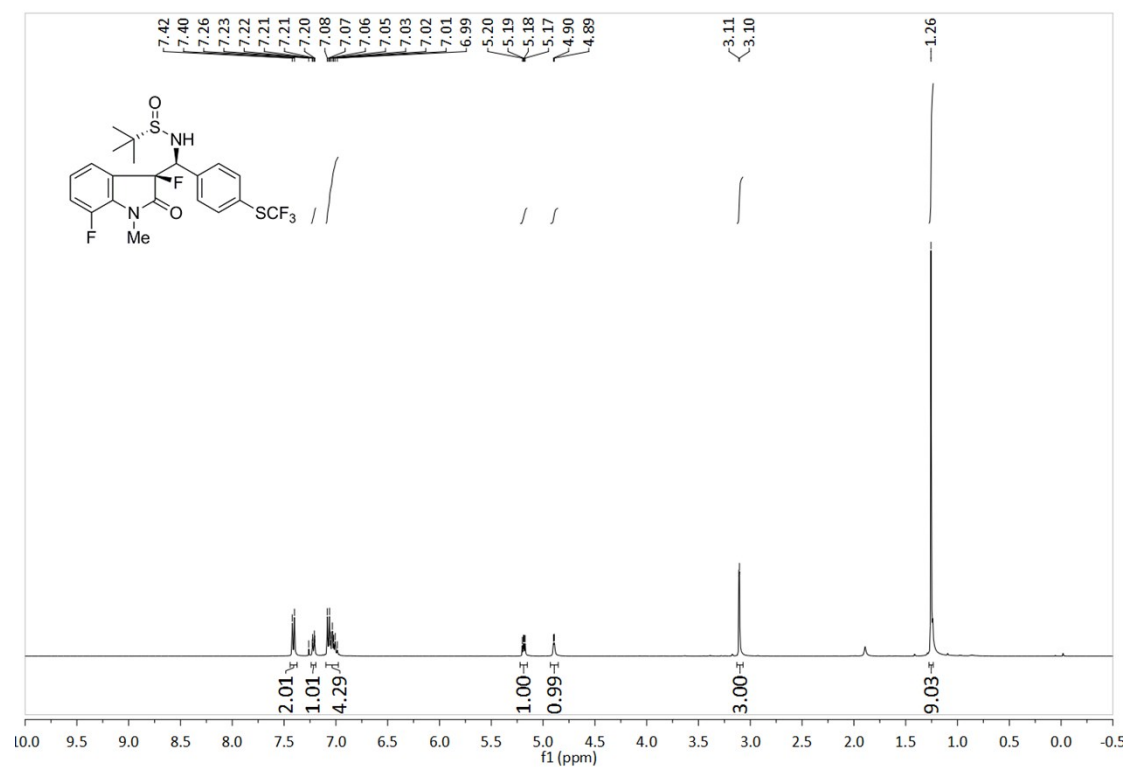

<sup>13</sup>C NMR spectrum of **13j**

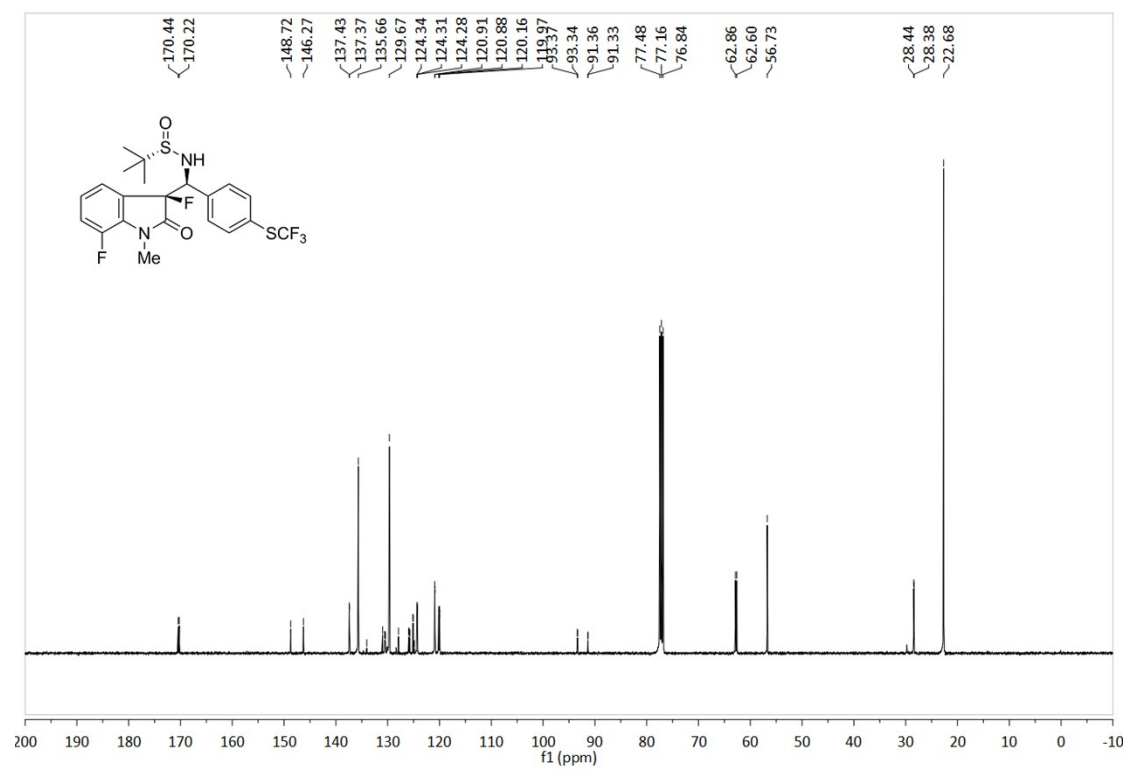

<sup>19</sup>F NMR spectrum of **13j**

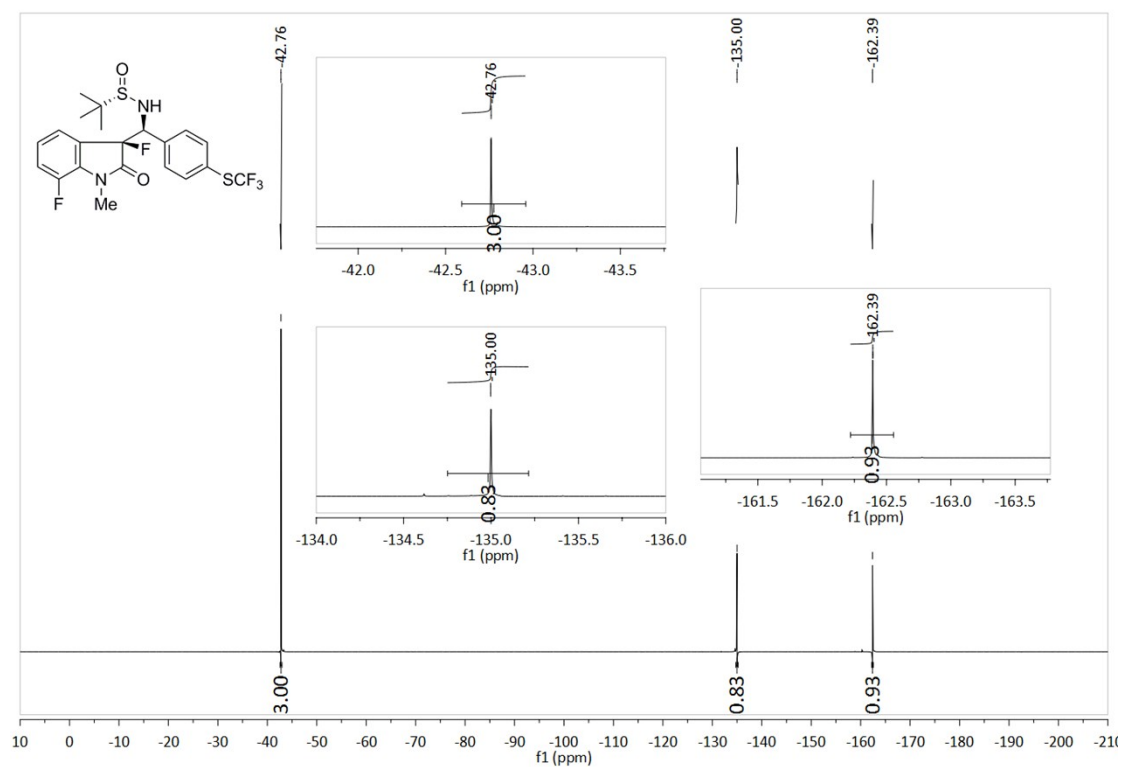

<sup>19</sup>F NMR spectrum of the crude reaction mixture

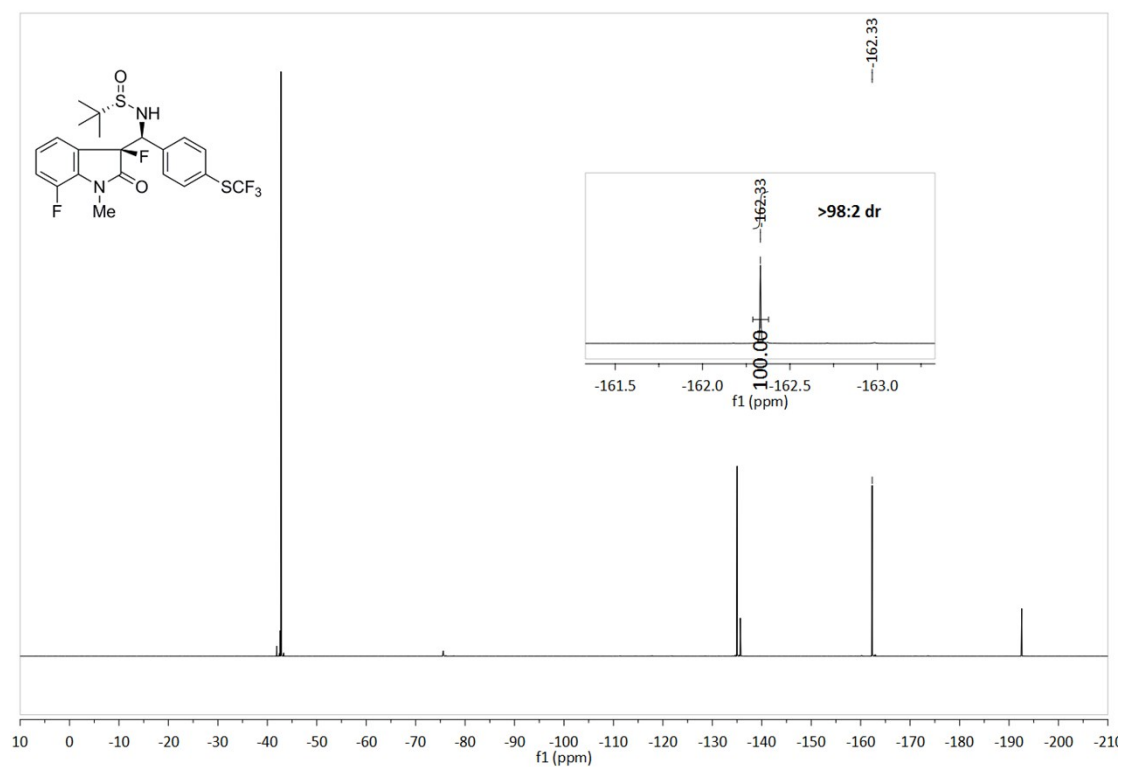

<sup>1</sup>H NMR spectrum of **13k**

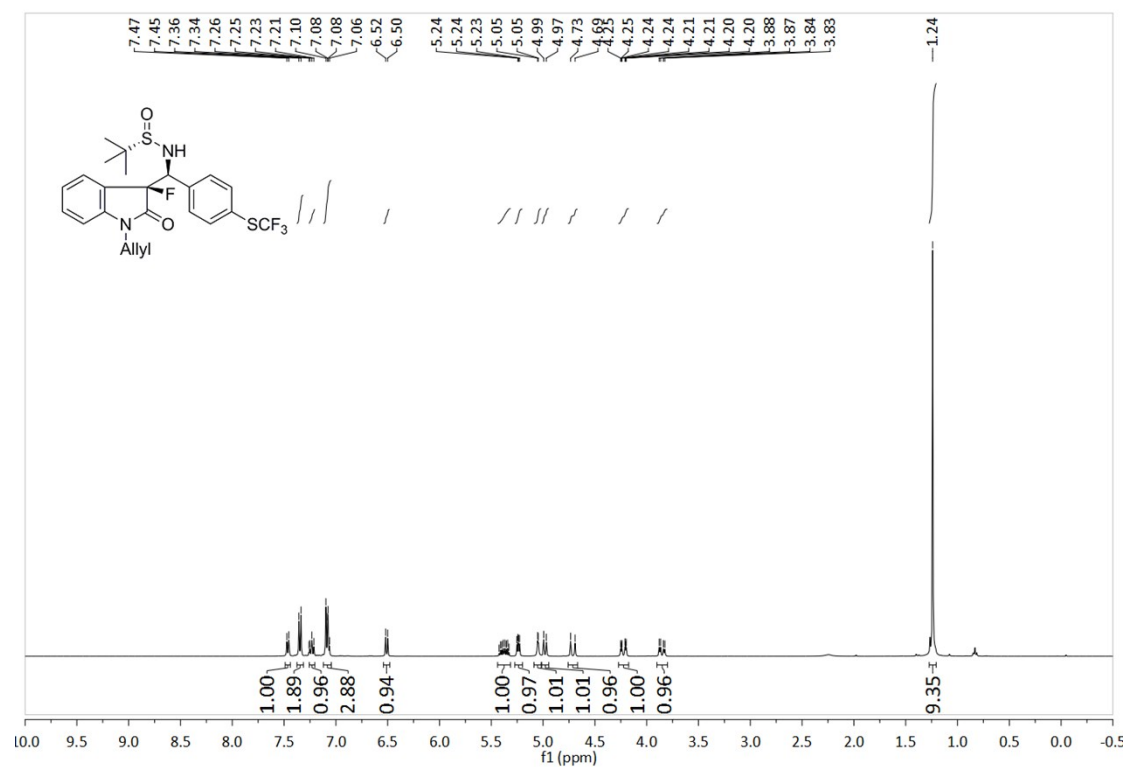

<sup>13</sup>C NMR spectrum of **13k**

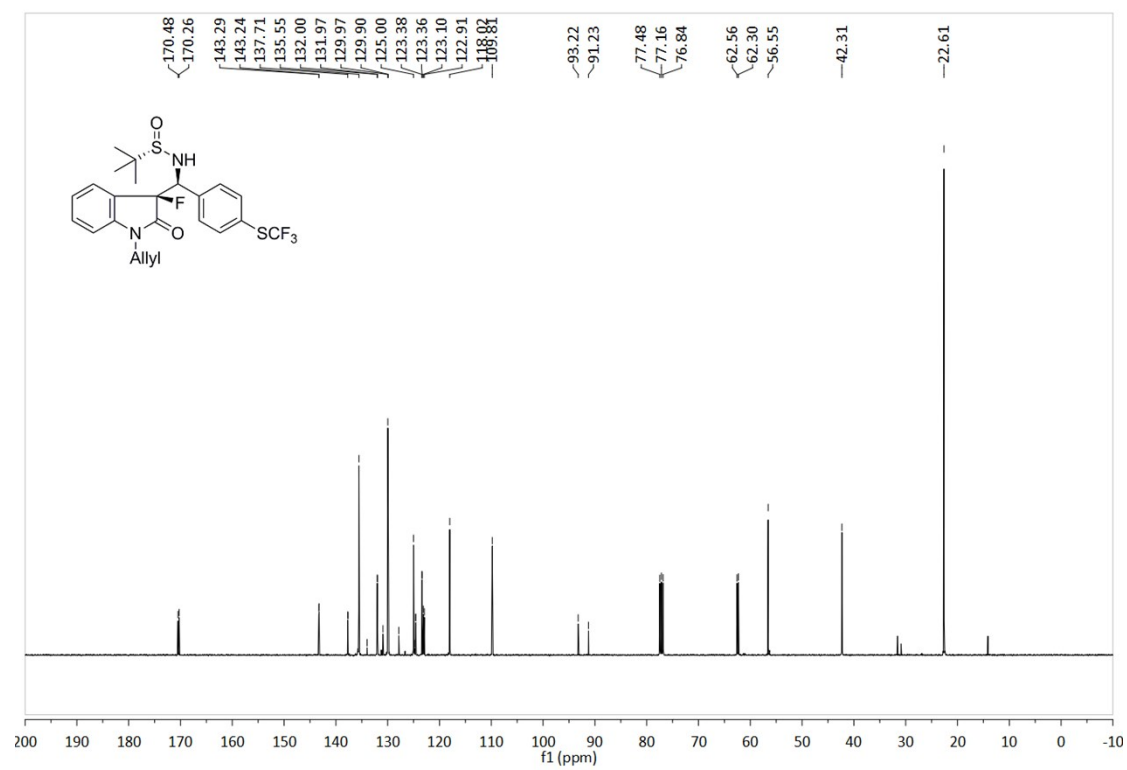

<sup>19</sup>F NMR spectrum of **13k**

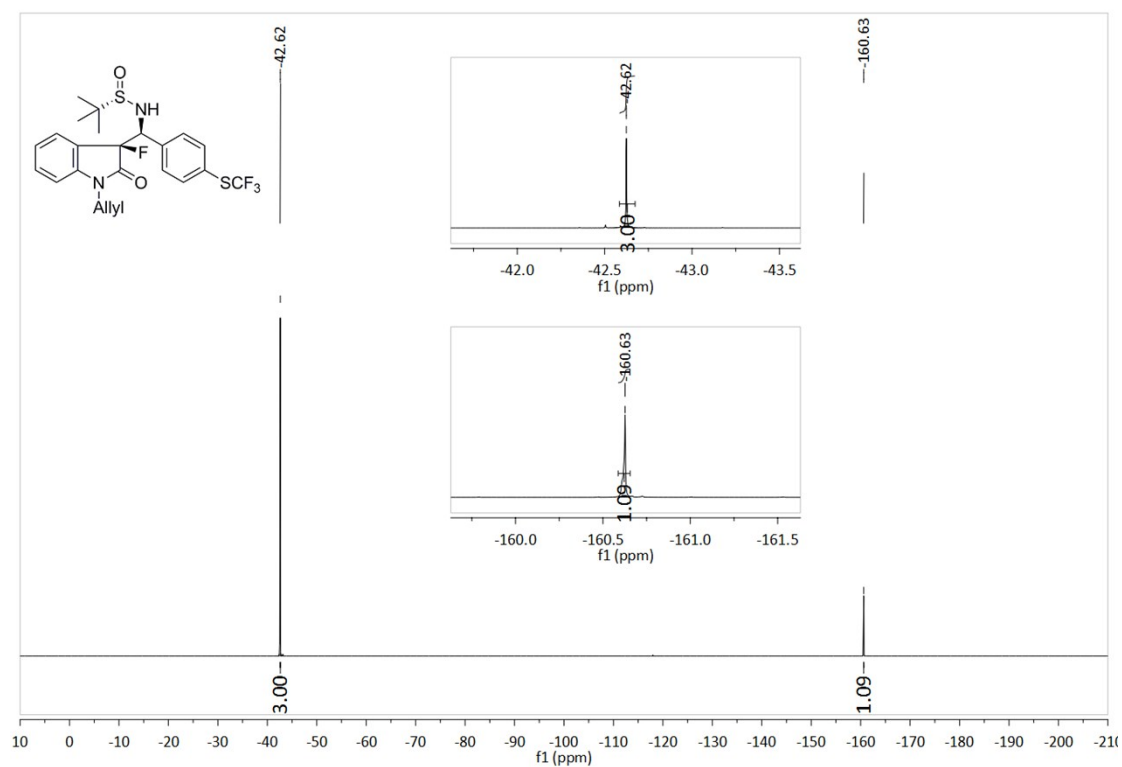

<sup>19</sup>F NMR spectrum of the crude reaction mixture

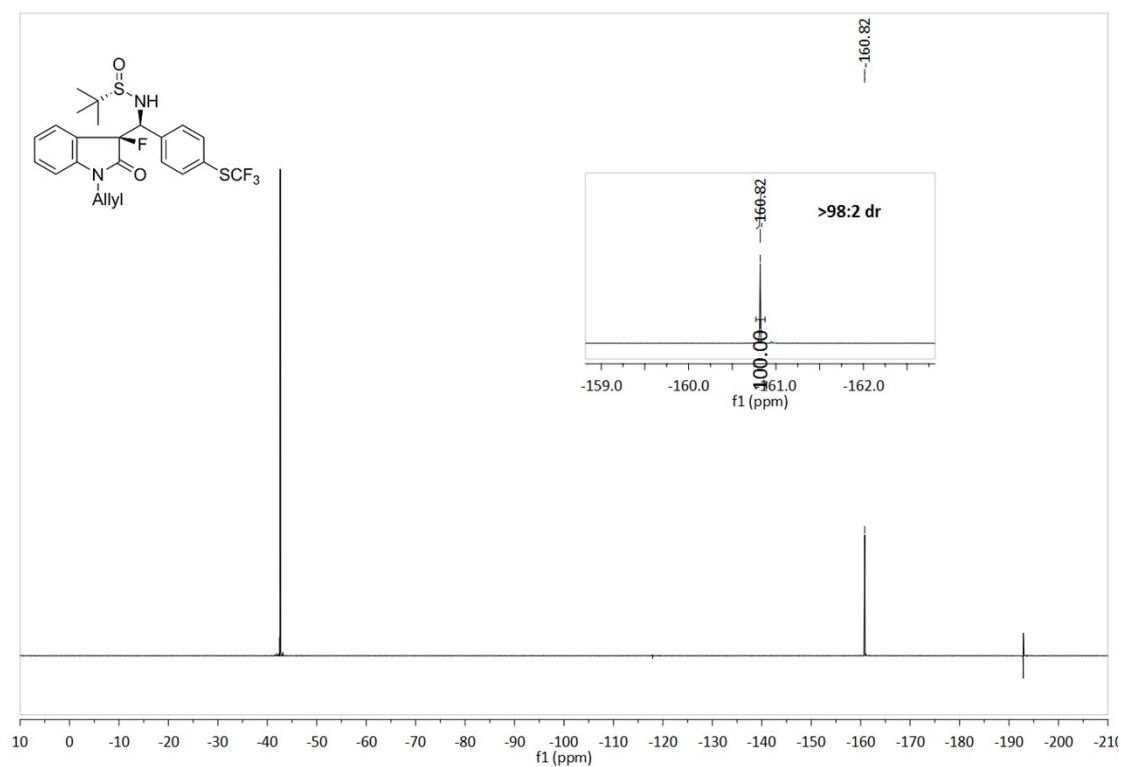

### <sup>1</sup>H NMR spectrum of **131**

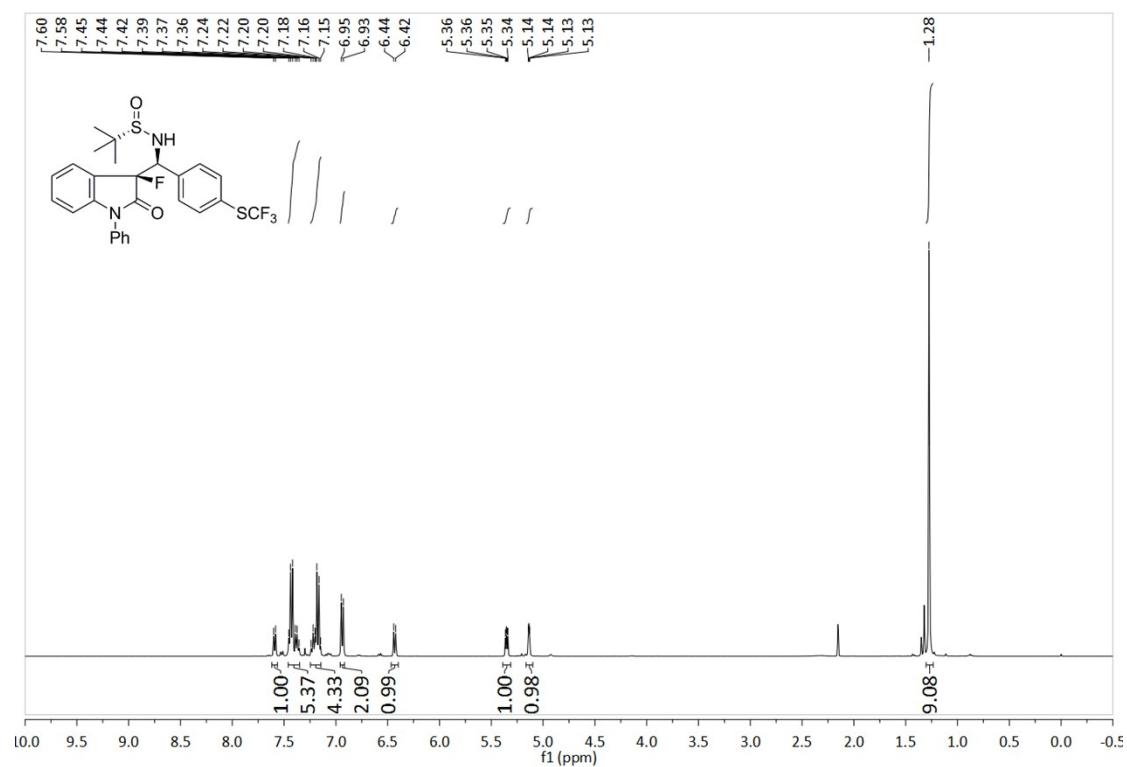

### <sup>13</sup>C NMR spectrum of **131**

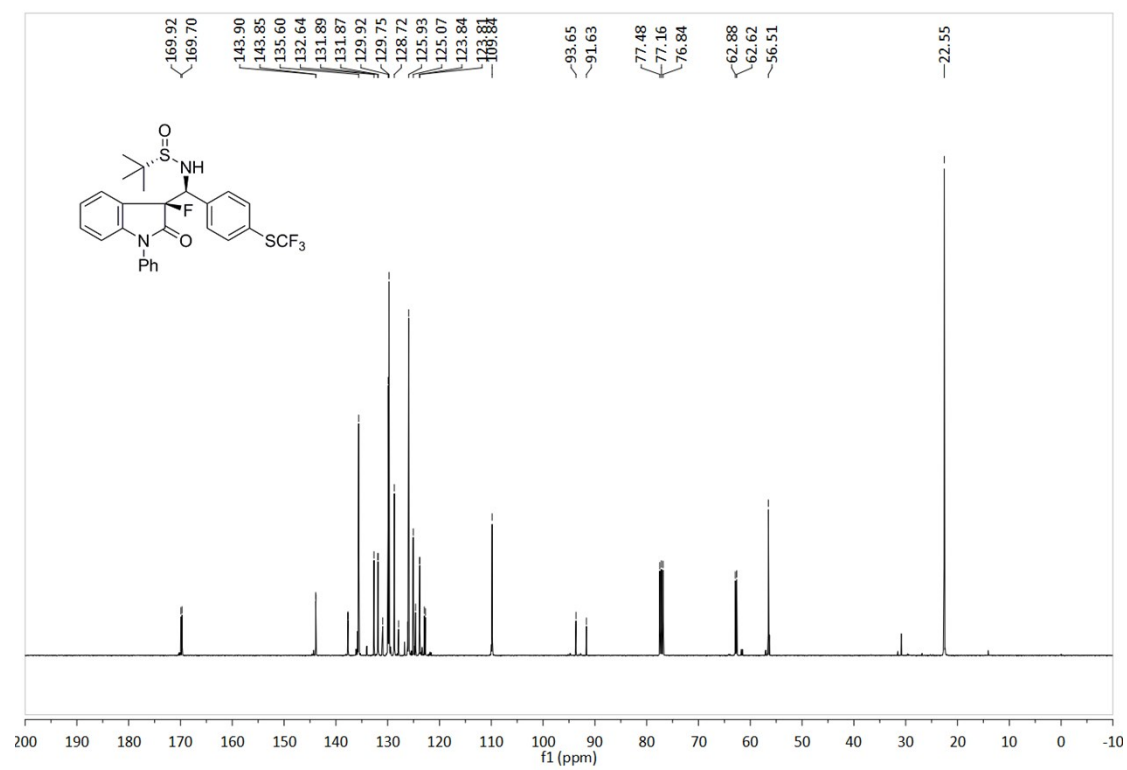

<sup>19</sup>F NMR spectrum of **131**

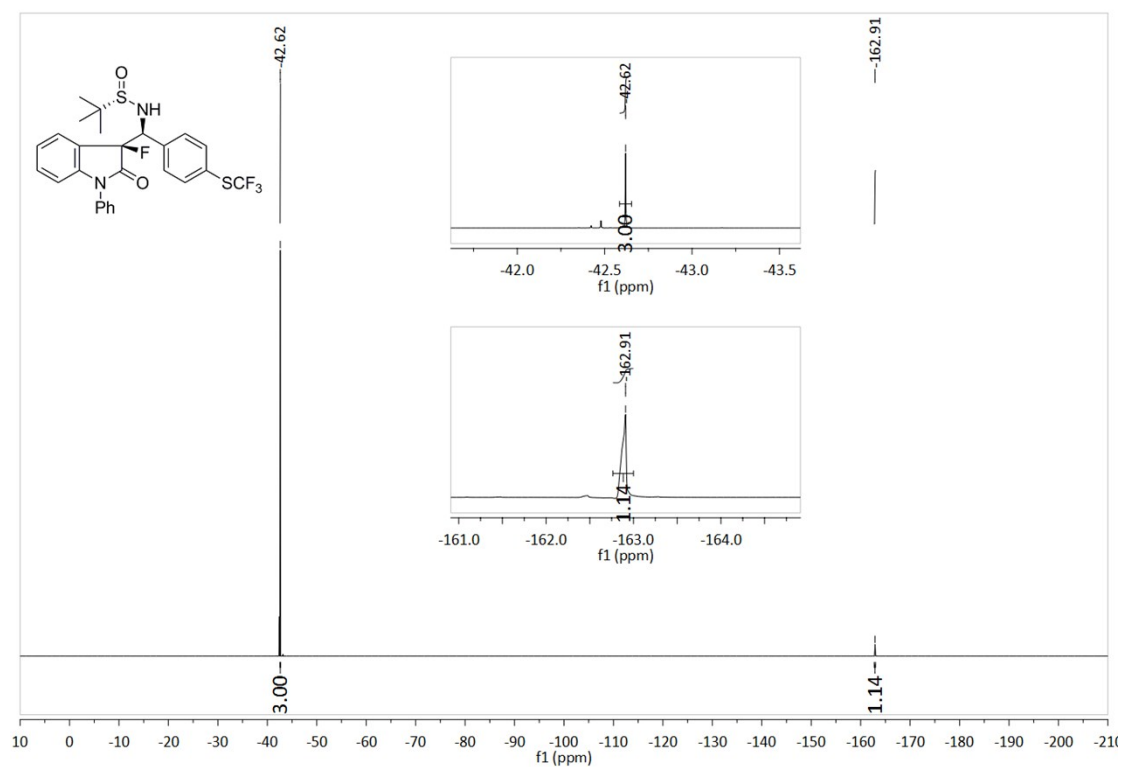

<sup>19</sup>F NMR spectrum of the crude reaction mixture

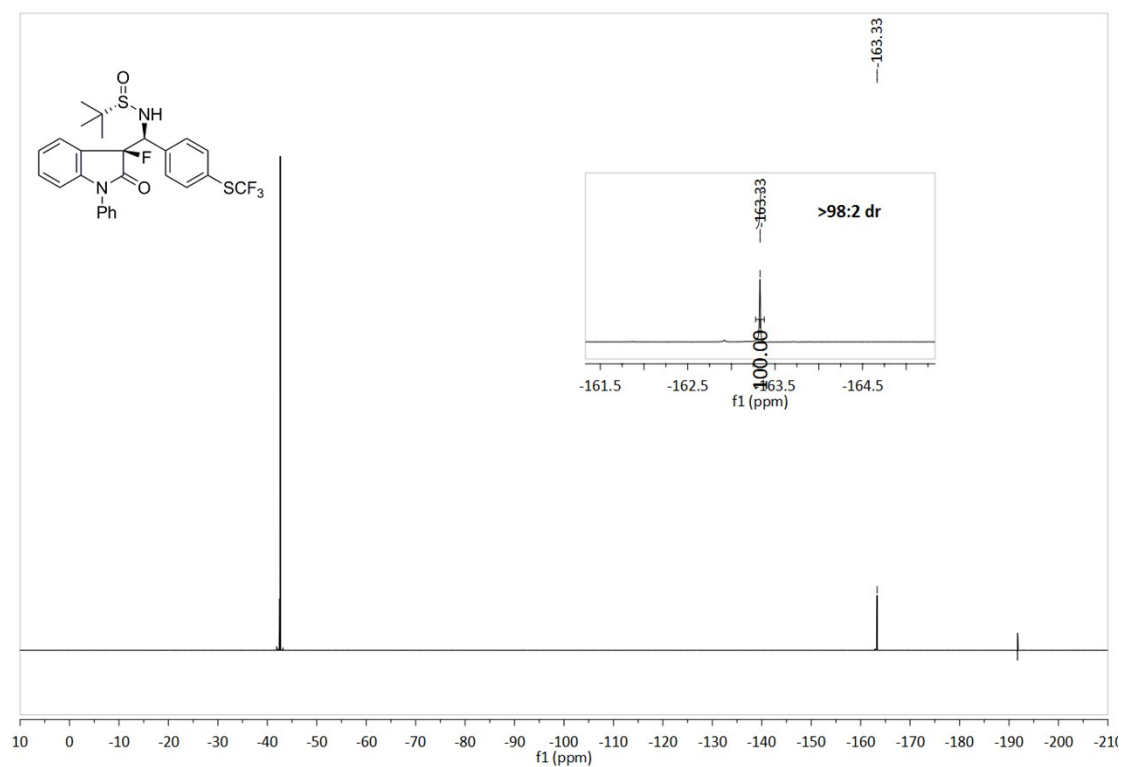

## 5.2. NMR spectra of deprotection product 14

<sup>1</sup>H NMR spectrum of 14

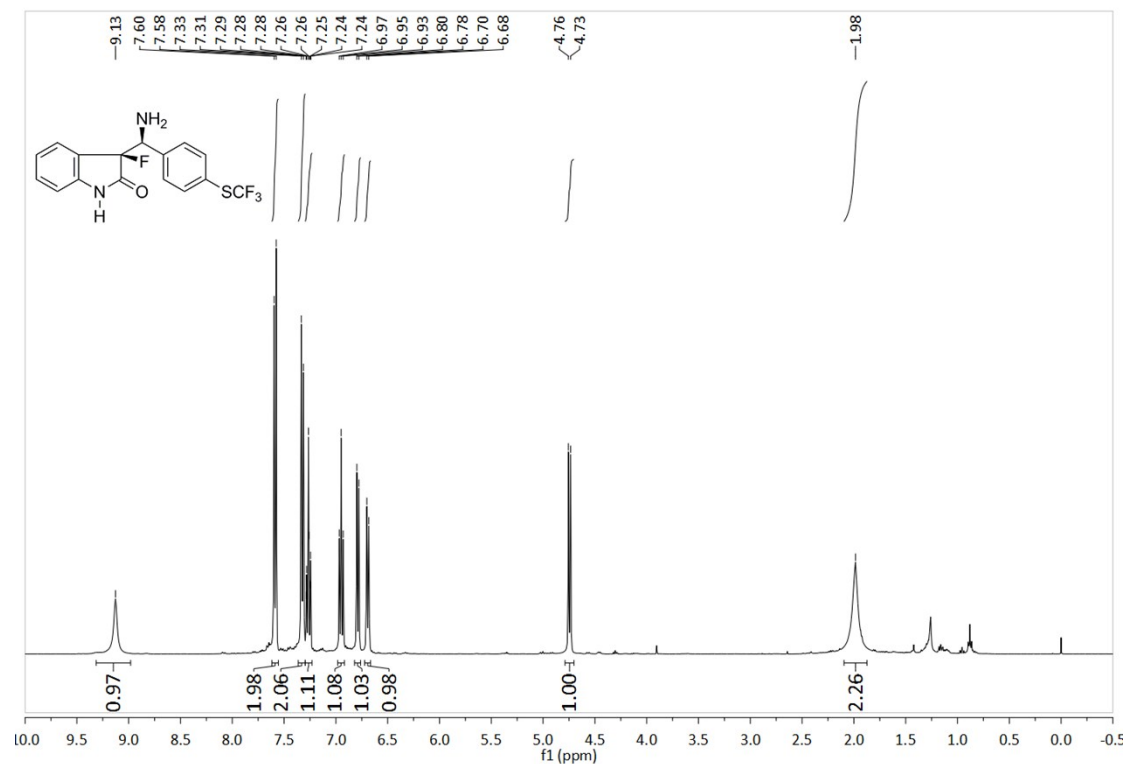

<sup>13</sup>C NMR spectrum of 14

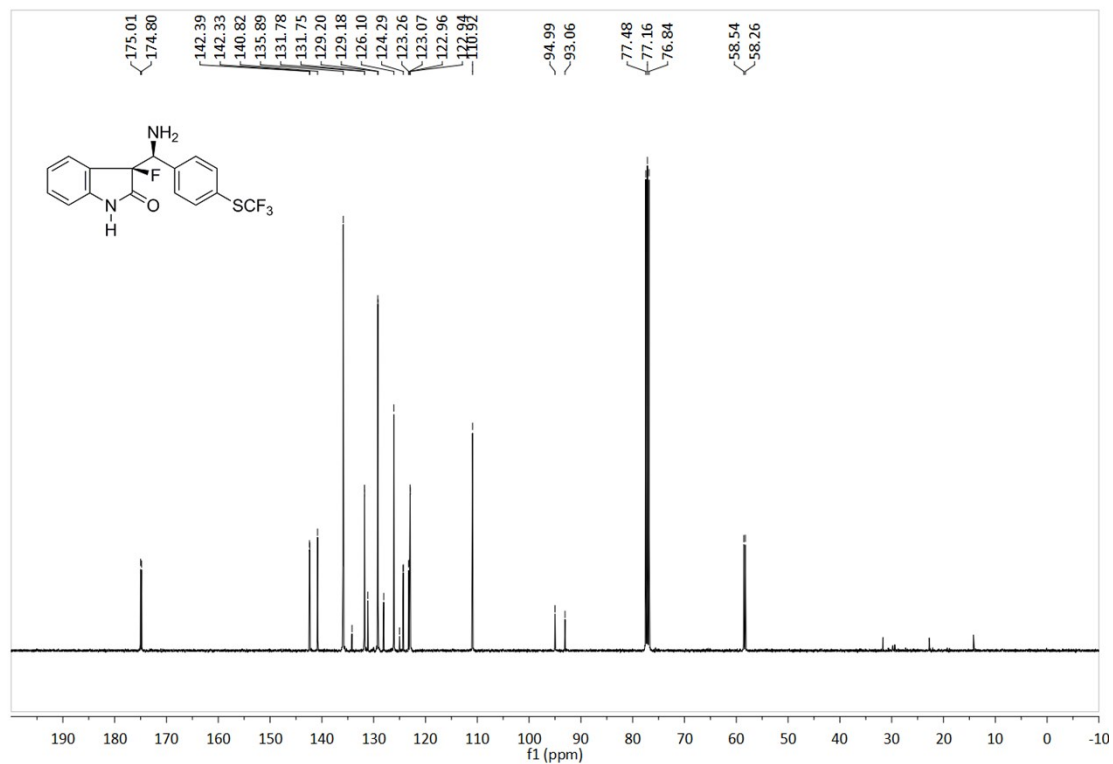

<sup>19</sup>F NMR spectrum of **14**

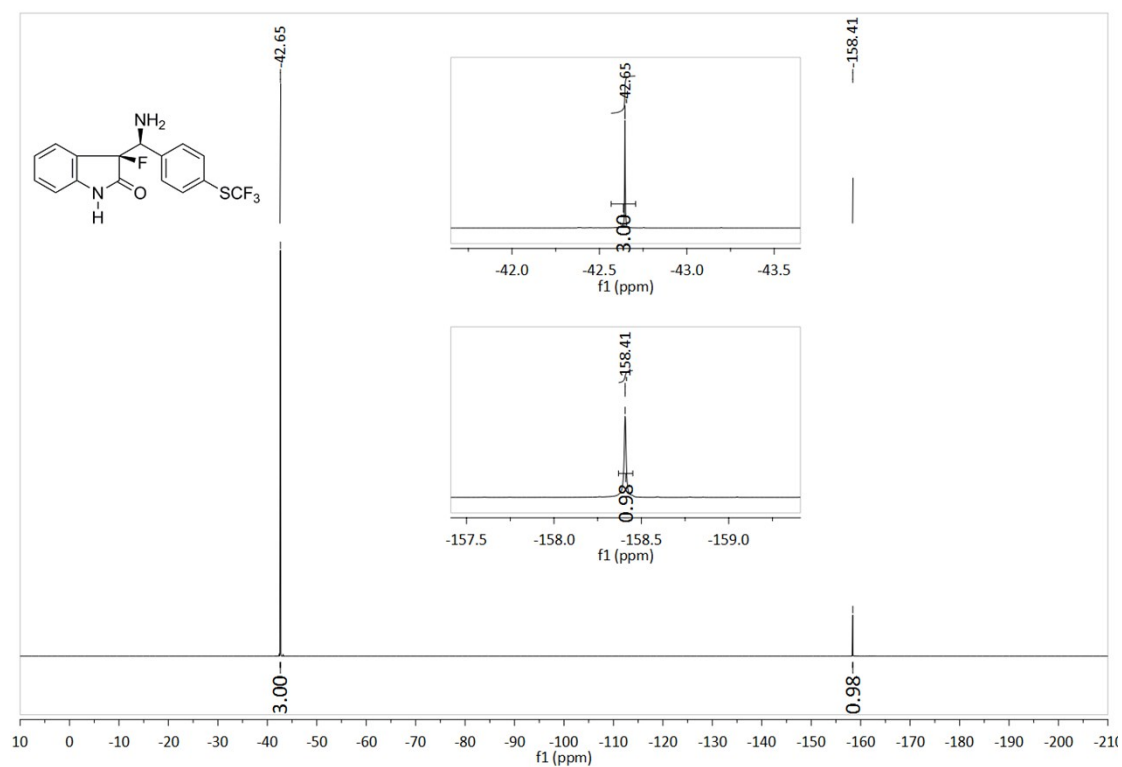



## 6. HPLC spectra of deprotection product 14

### HPLC spectrum of racemic-14

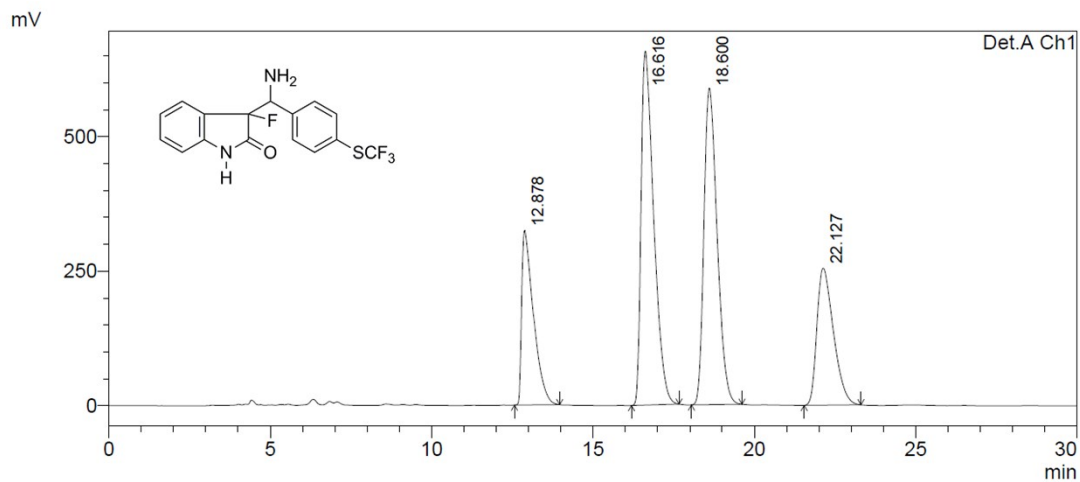

| Peak# | Ret. Time | Area     | Height  | Area %  | Height % |
|-------|-----------|----------|---------|---------|----------|
| 1     | 12.878    | 8207660  | 324798  | 15.760  | 17.789   |
| 2     | 16.616    | 17944787 | 657839  | 34.456  | 36.029   |
| 3     | 18.600    | 16817207 | 588625  | 32.291  | 32.239   |
| 4     | 22.127    | 9110306  | 254578  | 17.493  | 13.943   |
| Total |           | 52079960 | 1825840 | 100.000 | 100.000  |

### HPLC spectrum of (3*S*, 2'*S*)-14

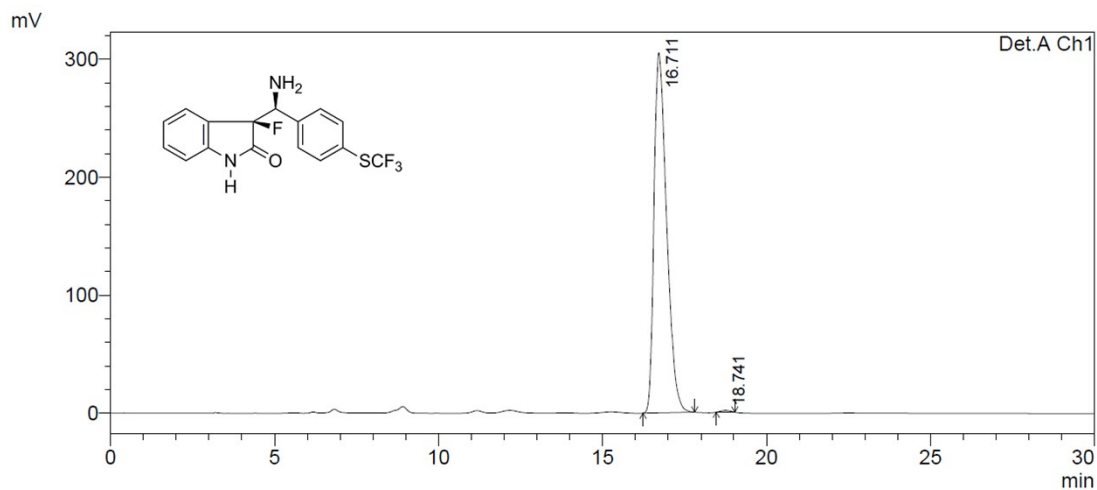

| Peak# | Ret. Time | Area    | Height | Area %  | Height % |
|-------|-----------|---------|--------|---------|----------|
| 1     | 16.711    | 8146878 | 305552 | 99.622  | 99.493   |
| 2     | 18.741    | 30952   | 1557   | 0.378   | 0.507    |
| Total |           | 8177830 | 307109 | 100.000 | 100.000  |
